# Supplementary material for: Pirikool® 300 CS, a new long-lasting capsule suspension formulation of the organophosphate insecticide pirimiphos-methyl for indoor residual spraying against pyrethroid-resistant malaria vectors
Source: PLoS One. 2022 Apr 18;17(4):e0267229. doi: 10.1371/journal.pone.0267229 (PMC9015130; doi:10.1371/journal.pone.0267229)
Supplement: S1 Table — (XLSX) [file pone.0267229.s001.xlsx]

## Sheet: Hut raw data
day	hut	treat	treat_name	treat_sub	sleeper	vrex_ufl	vrex_bfl	vrex_ufd	vrex_bfd	room_ufl	room_bfl	room_ufd	room_bfd	net_ufl	net_bfl	net_ufd	net_bfd	imm_dead	unf_live	unf_dead	bf_live	bf_dead	tot_unf	tot_blf	tot_live	tot_dead	tot_exop	tot_net	total	one	%bl_fed	%dead	%exophil
1	1	0	control	0	1	0	2	0	0	0	0	0	0	0	0	0	0	0	0	0	2	0	0	2	2	0	2	0	2	1	100	0	100
2	1	0	control	0	2	0	1	0	2	0	1	0	0	0	0	0	0	0	0	0	2	2	0	4	2	2	3	0	4	1	100	50	75
3	1	0	control	0	3	0	0	0	0	0	1	0	0	0	0	0	0	0	0	0	1	0	0	1	1	0	0	0	1	1	100	0	0
5	1	0	control	0	5	0	2	0	0	0	4	0	0	0	0	0	0	0	0	0	6	0	0	6	6	0	2	0	6	1	100	0	33.3333
6	1	0	control	0	6	0	1	0	1	0	0	0	0	0	0	0	0	0	0	0	1	1	0	2	1	1	2	0	2	1	100	50	100
7	1	0	control	0	7	0	1	0	0	0	0	0	0	0	0	0	0	0	0	0	1	0	0	1	1	0	1	0	1	1	100	0	100
8	1	0	control	0	8	0	1	0	0	1	3	0	0	0	0	0	0	0	1	0	4	0	1	4	5	0	1	0	5	1	80	0	20
10	1	0	control	0	1	0	4	0	1	0	5	0	0	0	0	0	0	0	0	0	9	1	0	10	9	1	5	0	10	1	100	10	50
11	1	0	control	0	2	0	3	0	0	0	0	0	0	0	0	0	0	0	0	0	3	0	0	3	3	0	3	0	3	1	100	0	100
12	1	0	control	0	3	0	5	0	0	0	0	0	0	0	0	0	0	0	0	0	5	0	0	5	5	0	5	0	5	1	100	0	100
13	1	0	control	0	4	0	6	0	0	0	7	0	0	0	0	0	0	0	0	0	13	0	0	13	13	0	6	0	13	1	100	0	46.1538
14	1	0	control	0	5	0	0	0	0	0	6	0	0	0	0	0	0	0	0	0	6	0	0	6	6	0	0	0	6	1	100	0	0
15	1	0	control	0	6	0	8	0	0	0	0	0	0	0	0	0	0	0	0	0	8	0	0	8	8	0	8	0	8	1	100	0	100
16	1	0	control	0	7	0	4	0	0	0	3	0	0	0	0	0	0	0	0	0	7	0	0	7	7	0	4	0	7	1	100	0	57.1429
17	1	0	control	0	8	0	9	0	0	0	10	0	0	0	0	0	0	0	0	0	19	0	0	19	19	0	9	0	19	1	100	0	47.3684
18	1	0	control	0	9	0	7	0	0	0	5	0	0	0	0	0	0	0	0	0	12	0	0	12	12	0	7	0	12	1	100	0	58.3333
19	1	0	control	0	1	0	9	1	1	0	11	0	0	0	0	0	0	1	0	1	20	1	1	21	20	2	11	0	22	1	95.4545	9.09091	50
20	1	0	control	0	2	0	6	0	2	0	7	0	0	0	0	0	0	0	0	0	13	2	0	15	13	2	8	0	15	1	100	13.3333	53.3333
21	1	0	control	0	3	0	6	0	1	0	6	0	0	0	0	0	0	0	0	0	12	1	0	13	12	1	7	0	13	1	100	7.69231	53.8462
22	1	0	control	0	4	0	2	0	8	0	1	2	9	0	0	0	0	15	0	2	3	17	2	20	3	19	10	0	22	1	90.9091	86.3636	45.4545
23	1	0	control	0	5	0	9	2	1	7	25	0	1	0	0	0	0	1	7	2	34	2	9	36	41	4	12	0	45	1	80	8.88889	26.6667
24	1	0	control	0	6	0	4	0	5	1	6	0	3	0	0	0	0	8	1	0	10	8	1	18	11	8	9	0	19	1	94.7368	42.1053	47.3684
25	1	0	control	0	7	0	2	0	0	0	5	0	0	0	0	0	0	0	0	0	7	0	0	7	7	0	2	0	7	1	100	0	28.5714
26	1	0	control	0	8	0	4	0	0	0	7	0	0	0	0	0	0	0	0	0	11	0	0	11	11	0	4	0	11	1	100	0	36.3636
27	1	0	control	0	9	0	10	0	1	0	12	0	1	0	0	0	0	1	0	0	22	2	0	24	22	2	11	0	24	1	100	8.33333	45.8333
28	1	0	control	0	1	0	11	0	0	0	18	0	0	0	0	0	0	0	0	0	29	0	0	29	29	0	11	0	29	1	100	0	37.931
29	1	0	control	0	2	0	9	0	0	0	3	0	0	0	0	0	0	0	0	0	12	0	0	12	12	0	9	0	12	1	100	0	75
30	1	0	control	0	3	0	14	0	0	0	15	0	0	0	0	0	0	0	0	0	29	0	0	29	29	0	14	0	29	1	100	0	48.2759
31	1	0	control	0	4	0	10	0	0	0	3	0	0	0	0	0	0	0	0	0	13	0	0	13	13	0	10	0	13	1	100	0	76.9231
32	1	0	control	0	5	0	11	0	0	1	15	0	0	0	0	0	0	0	1	0	26	0	1	26	27	0	11	0	27	1	96.2963	0	40.7407
33	1	0	control	0	6	5	9	0	0	0	0	0	0	0	0	0	0	0	5	0	9	0	5	9	14	0	14	0	14	1	64.2857	0	100
34	1	0	control	0	7	1	13	0	0	0	8	0	0	0	0	0	0	0	1	0	21	0	1	21	22	0	14	0	22	1	95.4545	0	63.6364
35	1	0	control	0	8	0	4	0	0	0	20	0	0	0	0	0	0	0	0	0	24	0	0	24	24	0	4	0	24	1	100	0	16.6667
36	1	0	control	0	9	0	8	0	0	0	13	0	0	0	0	0	0	0	0	0	21	0	0	21	21	0	8	0	21	1	100	0	38.0952
37	1	0	control	0	1	0	15	0	0	0	15	0	0	0	0	0	0	0	0	0	30	0	0	30	30	0	15	0	30	1	100	0	50
38	1	0	control	0	2	0	6	0	0	0	10	0	0	0	0	0	0	0	0	0	16	0	0	16	16	0	6	0	16	1	100	0	37.5
39	1	0	control	0	3	0	3	0	0	0	5	0	0	0	0	0	0	0	0	0	8	0	0	8	8	0	3	0	8	1	100	0	37.5
40	1	0	control	0	4	0	1	0	0	0	8	0	0	0	0	0	0	0	0	0	9	0	0	9	9	0	1	0	9	1	100	0	11.1111
41	1	0	control	0	5	0	9	0	0	0	7	0	0	0	0	0	0	0	0	0	16	0	0	16	16	0	9	0	16	1	100	0	56.25
42	1	0	control	0	6	1	10	0	0	0	0	0	0	0	0	0	0	0	1	0	10	0	1	10	11	0	11	0	11	1	90.9091	0	100
43	1	0	control	0	7	0	5	0	0	2	6	0	0	0	0	0	0	0	2	0	11	0	2	11	13	0	5	0	13	1	84.6154	0	38.4615
44	1	0	control	0	8	0	15	0	0	0	22	0	0	0	0	0	0	0	0	0	37	0	0	37	37	0	15	0	37	1	100	0	40.5405
45	1	0	control	0	9	0	18	0	0	0	40	0	0	0	0	0	0	0	0	0	58	0	0	58	58	0	18	0	58	1	100	0	31.0345
46	1	0	control	0	1	0	28	0	0	0	82	0	0	0	0	0	0	0	0	0	110	0	0	110	110	0	28	0	110	1	100	0	25.4545
47	1	0	control	0	2	0	12	0	0	0	46	0	0	0	0	0	0	0	0	0	58	0	0	58	58	0	12	0	58	1	100	0	20.6897
48	1	0	control	0	3	5	50	0	0	0	40	0	0	0	0	0	0	0	5	0	90	0	5	90	95	0	55	0	95	1	94.7368	0	57.8947
49	1	0	control	0	4	0	12	0	0	0	14	0	0	0	0	0	0	0	0	0	26	0	0	26	26	0	12	0	26	1	100	0	46.1538
50	1	0	control	0	5	2	21	0	0	3	40	0	0	0	0	0	0	0	5	0	61	0	5	61	66	0	23	0	66	1	92.4242	0	34.8485
51	1	0	control	0	6	1	31	0	0	0	3	0	0	0	0	0	0	0	1	0	34	0	1	34	35	0	32	0	35	1	97.1429	0	91.4286
52	1	0	control	0	7	0	43	0	0	0	53	0	0	0	0	0	0	0	0	0	96	0	0	96	96	0	43	0	96	1	100	0	44.7917
53	1	0	control	0	8	1	46	0	0	2	54	0	0	0	0	0	0	0	3	0	100	0	3	100	103	0	47	0	103	1	97.0874	0	45.6311
54	1	0	control	0	9	1	15	0	0	0	57	0	0	0	0	0	0	0	1	0	72	0	1	72	73	0	16	0	73	1	98.6301	0	21.9178
67	1	0	control	0	1	0	7	0	0	0	87	0	0	0	0	0	0	0	0	0	94	0	0	94	94	0	7	0	94	1	100	0	7.44681
68	1	0	control	0	2	0	16	0	0	0	57	0	0	0	0	0	0	0	0	0	73	0	0	73	73	0	16	0	73	1	100	0	21.9178
69	1	0	control	0	3	1	21	0	0	0	60	0	0	0	0	0	0	0	1	0	81	0	1	81	82	0	22	0	82	1	98.7805	0	26.8293
70	1	0	control	0	4	0	1	0	0	0	4	0	0	0	0	0	0	0	0	0	5	0	0	5	5	0	1	0	5	1	100	0	20
71	1	0	control	0	5	0	17	0	0	0	3	0	0	0	0	0	0	0	0	0	20	0	0	20	20	0	17	0	20	1	100	0	85
72	1	0	control	0	6	4	31	0	0	3	9	0	0	0	0	0	0	0	7	0	40	0	7	40	47	0	35	0	47	1	85.1064	0	74.4681
73	1	0	control	0	7	1	17	0	0	2	28	0	0	0	0	0	0	0	3	0	45	0	3	45	48	0	18	0	48	1	93.75	0	37.5
74	1	0	control	0	8	0	4	0	0	0	37	0	0	0	0	0	0	0	0	0	41	0	0	41	41	0	4	0	41	1	100	0	9.7561
75	1	0	control	0	9	1	21	0	0	1	33	0	0	0	0	0	0	0	2	0	54	0	2	54	56	0	22	0	56	1	96.4286	0	39.2857
76	1	0	control	0	1	1	16	0	0	0	24	0	0	0	0	0	0	0	1	0	40	0	1	40	41	0	17	0	41	1	97.561	0	41.4634
77	1	0	control	0	2	2	37	0	0	2	53	0	0	0	0	0	0	0	4	0	90	0	4	90	94	0	39	0	94	1	95.7447	0	41.4894
78	1	0	control	0	3	2	8	0	0	1	38	0	0	0	0	0	0	0	3	0	46	0	3	46	49	0	10	0	49	1	93.8776	0	20.4082
79	1	0	control	0	4	0	20	0	0	0	13	0	0	0	0	0	0	0	0	0	33	0	0	33	33	0	20	0	33	1	100	0	60.6061
80	1	0	control	0	5	1	5	0	0	0	17	0	0	0	0	0	0	0	1	0	22	0	1	22	23	0	6	0	23	1	95.6522	0	26.087
81	1	0	control	0	6	1	9	0	0	1	18	0	0	0	0	0	0	0	2	0	27	0	2	27	29	0	10	0	29	1	93.1034	0	34.4828
82	1	0	control	0	7	1	10	0	0	0	21	0	0	0	0	0	0	0	1	0	31	0	1	31	32	0	11	0	32	1	96.875	0	34.375
83	1	0	control	0	8	2	0	0	3	1	10	0	0	0	0	0	0	0	3	0	10	3	3	13	13	3	5	0	16	1	81.25	18.75	31.25
84	1	0	control	0	9	1	3	0	0	0	11	0	0	0	0	0	0	0	1	0	14	0	1	14	15	0	4	0	15	1	93.3333	0	26.6667
85	1	0	control	0	1	0	3	0	0	0	18	0	0	0	0	0	0	0	0	0	21	0	0	21	21	0	3	0	21	1	100	0	14.2857
86	1	0	control	0	2	1	7	0	0	0	18	0	0	0	0	0	0	0	1	0	25	0	1	25	26	0	8	0	26	1	96.1538	0	30.7692
87	1	0	control	0	3	1	1	0	0	0	10	0	0	0	0	0	0	0	1	0	11	0	1	11	12	0	2	0	12	1	91.6667	0	16.6667
88	1	0	control	0	4	1	11	0	0	0	12	0	0	0	0	0	0	0	1	0	23	0	1	23	24	0	12	0	24	1	95.8333	0	50
89	1	0	control	0	5	2	24	0	0	1	42	0	0	0	0	0	0	0	3	0	66	0	3	66	69	0	26	0	69	1	95.6522	0	37.6812
90	1	0	control	0	6	0	3	0	0	0	34	0	0	0	0	0	0	0	0	0	37	0	0	37	37	0	3	0	37	1	100	0	8.10811
91	1	0	control	0	7	0	7	0	0	0	13	0	0	0	0	0	0	0	0	0	20	0	0	20	20	0	7	0	20	1	100	0	35
92	1	0	control	0	8	0	10	0	0	1	14	0	0	0	0	0	0	0	1	0	24	0	1	24	25	0	10	0	25	1	96	0	40
93	1	0	control	0	9	1	33	0	0	0	42	0	0	0	0	0	0	0	1	0	75	0	1	75	76	0	34	0	76	1	98.6842	0	44.7368
94	1	0	control	0	1	0	39	0	0	0	53	0	0	0	0	0	0	0	0	0	92	0	0	92	92	0	39	0	92	1	100	0	42.3913
95	1	0	control	0	2	0	3	0	0	0	47	0	0	0	0	0	0	0	0	0	50	0	0	50	50	0	3	0	50	1	100	0	6
96	1	0	control	0	3	0	12	0	0	0	89	0	0	0	0	0	0	0	0	0	101	0	0	101	101	0	12	0	101	1	100	0	11.8812
97	1	0	control	0	4	0	9	0	0	0	41	0	0	0	0	0	0	0	0	0	50	0	0	50	50	0	9	0	50	1	100	0	18
98	1	0	control	0	5	0	27	0	0	0	18	0	0	0	0	0	0	0	0	0	45	0	0	45	45	0	27	0	45	1	100	0	60
99	1	0	control	0	6	0	9	0	0	0	10	0	0	0	0	0	0	0	0	0	19	0	0	19	19	0	9	0	19	1	100	0	47.3684
100	1	0	control	0	7	0	10	0	0	0	13	0	0	0	0	0	0	0	0	0	23	0	0	23	23	0	10	0	23	1	100	0	43.4783
101	1	0	control	0	8	0	5	0	0	0	18	0	0	0	0	0	0	0	0	0	23	0	0	23	23	0	5	0	23	1	100	0	21.7391
102	1	0	control	0	9	0	12	0	0	0	15	0	0	0	0	0	0	0	0	0	27	0	0	27	27	0	12	0	27	1	100	0	44.4444
103	1	0	control	0	1	0	12	0	0	0	15	0	0	0	0	0	0	0	0	0	27	0	0	27	27	0	12	0	27	1	100	0	44.4444
104	1	0	control	0	2	0	4	0	0	0	17	0	0	0	0	0	0	0	0	0	21	0	0	21	21	0	4	0	21	1	100	0	19.0476
105	1	0	control	0	3	0	9	0	0	0	31	0	0	0	0	0	0	0	0	0	40	0	0	40	40	0	9	0	40	1	100	0	22.5
106	1	0	control	0	4	0	11	0	0	0	12	0	0	0	0	0	0	0	0	0	23	0	0	23	23	0	11	0	23	1	100	0	47.8261
107	1	0	control	0	5	0	11	0	0	0	5	0	0	0	0	0	0	0	0	0	16	0	0	16	16	0	11	0	16	1	100	0	68.75
108	1	0	control	0	6	0	11	0	0	0	16	0	0	0	0	0	0	0	0	0	27	0	0	27	27	0	11	0	27	1	100	0	40.7407
109	1	0	control	0	7	0	5	0	0	0	9	0	0	0	0	0	0	0	0	0	14	0	0	14	14	0	5	0	14	1	100	0	35.7143
110	1	0	control	0	8	0	3	0	0	0	10	0	0	0	0	0	0	0	0	0	13	0	0	13	13	0	3	0	13	1	100	0	23.0769
111	1	0	control	0	9	0	5	0	0	0	2	0	0	0	0	0	0	0	0	0	7	0	0	7	7	0	5	0	7	1	100	0	71.4286
112	1	0	control	0	1	0	7	0	0	0	8	0	0	0	0	0	0	0	0	0	15	0	0	15	15	0	7	0	15	1	100	0	46.6667
113	1	0	control	0	2	0	9	0	0	0	13	0	0	0	0	0	0	0	0	0	22	0	0	22	22	0	9	0	22	1	100	0	40.9091
114	1	0	control	0	3	0	3	0	0	0	6	0	0	0	0	0	0	0	0	0	9	0	0	9	9	0	3	0	9	1	100	0	33.3333
115	1	0	control	0	4	0	11	0	0	0	2	0	0	0	0	0	0	0	0	0	13	0	0	13	13	0	11	0	13	1	100	0	84.6154
116	1	0	control	0	5	0	5	0	0	0	3	0	0	0	0	0	0	0	0	0	8	0	0	8	8	0	5	0	8	1	100	0	62.5
117	1	0	control	0	6	0	7	0	0	0	8	0	0	0	0	0	0	0	0	0	15	0	0	15	15	0	7	0	15	1	100	0	46.6667
118	1	0	control	0	7	0	2	0	0	0	4	0	0	0	0	0	0	0	0	0	6	0	0	6	6	0	2	0	6	1	100	0	33.3333
119	1	0	control	0	8	0	6	0	0	0	11	0	0	0	0	0	0	0	0	0	17	0	0	17	17	0	6	0	17	1	100	0	35.2941
120	1	0	control	0	9	0	2	0	0	0	10	0	0	0	0	0	0	0	0	0	12	0	0	12	12	0	2	0	12	1	100	0	16.6667
121	1	0	control	0	1	0	7	0	0	0	10	0	0	0	0	0	0	0	0	0	17	0	0	17	17	0	7	0	17	1	100	0	41.1765
122	1	0	control	0	2	0	9	0	0	0	2	0	0	0	0	0	0	0	0	0	11	0	0	11	11	0	9	0	11	1	100	0	81.8182
123	1	0	control	0	3	0	2	0	0	0	6	0	0	0	0	0	0	0	0	0	8	0	0	8	8	0	2	0	8	1	100	0	25
124	1	0	control	0	4	0	5	0	0	0	1	0	0	0	0	0	0	0	0	0	6	0	0	6	6	0	5	0	6	1	100	0	83.3333
125	1	0	control	0	5	0	7	0	0	0	12	0	0	0	0	0	0	0	0	0	19	0	0	19	19	0	7	0	19	1	100	0	36.8421
126	1	0	control	0	6	0	7	0	0	0	6	0	0	0	0	0	0	0	0	0	13	0	0	13	13	0	7	0	13	1	100	0	53.8462
127	1	0	control	0	7	0	5	0	0	0	2	0	0	0	0	0	0	0	0	0	7	0	0	7	7	0	5	0	7	1	100	0	71.4286
128	1	0	control	0	8	0	4	0	0	0	5	0	0	0	0	0	0	0	0	0	9	0	0	9	9	0	4	0	9	1	100	0	44.4444
129	1	0	control	0	9	0	10	0	0	0	8	0	0	0	0	0	0	0	0	0	18	0	0	18	18	0	10	0	18	1	100	0	55.5556
130	1	0	control	0	1	0	6	0	0	0	16	0	0	0	0	0	0	0	0	0	22	0	0	22	22	0	6	0	22	1	100	0	27.2727
131	1	0	control	0	2	0	17	0	0	0	12	0	0	0	0	0	0	0	0	0	29	0	0	29	29	0	17	0	29	1	100	0	58.6207
132	1	0	control	0	3	0	17	0	0	0	23	0	0	0	0	0	0	0	0	0	40	0	0	40	40	0	17	0	40	1	100	0	42.5
133	1	0	control	0	4	0	5	0	0	0	8	0	0	0	0	0	0	0	0	0	13	0	0	13	13	0	5	0	13	1	100	0	38.4615
134	1	0	control	0	5	0	5	0	0	0	6	0	0	0	0	0	0	0	0	0	11	0	0	11	11	0	5	0	11	1	100	0	45.4545
135	1	0	control	0	6	0	8	0	0	0	12	0	0	0	0	0	0	0	0	0	20	0	0	20	20	0	8	0	20	1	100	0	40
136	1	0	control	0	7	0	23	0	0	0	6	0	0	0	0	0	0	0	0	0	29	0	0	29	29	0	23	0	29	1	100	0	79.3103
137	1	0	control	0	8	0	5	0	0	0	8	0	0	0	0	0	0	0	0	0	13	0	0	13	13	0	5	0	13	1	100	0	38.4615
138	1	0	control	0	9	0	14	0	0	0	11	0	0	0	0	0	0	0	0	0	25	0	0	25	25	0	14	0	25	1	100	0	56
139	1	0	control	0	1	0	38	0	0	0	57	0	0	0	0	0	0	0	0	0	95	0	0	95	95	0	38	0	95	1	100	0	40
140	1	0	control	0	2	3	5	0	0	3	0	0	0	0	0	0	0	0	6	0	5	0	6	5	11	0	8	0	11	1	45.4545	0	72.7273
141	1	0	control	0	3	3	18	0	0	1	18	0	0	0	0	0	0	0	4	0	36	0	4	36	40	0	21	0	40	1	90	0	52.5
142	1	0	control	0	4	2	5	0	0	0	7	0	0	0	0	0	0	0	2	0	12	0	2	12	14	0	7	0	14	1	85.7143	0	50
143	1	0	control	0	5	0	6	0	0	0	4	0	0	0	0	0	0	0	0	0	10	0	0	10	10	0	6	0	10	1	100	0	60
144	1	0	control	0	6	0	15	0	0	1	14	0	0	0	0	0	0	0	1	0	29	0	1	29	30	0	15	0	30	1	96.6667	0	50
145	1	0	control	0	7	0	4	0	0	0	5	0	0	0	0	0	0	0	0	0	9	0	0	9	9	0	4	0	9	1	100	0	44.4444
146	1	0	control	0	8	0	4	0	0	0	12	0	0	0	0	0	0	0	0	0	16	0	0	16	16	0	4	0	16	1	100	0	25
147	1	0	control	0	9	0	2	0	0	0	10	0	0	0	0	0	0	0	0	0	12	0	0	12	12	0	2	0	12	1	100	0	16.6667
148	1	0	control	0	1	2	15	0	0	0	14	0	0	0	0	0	0	0	2	0	29	0	2	29	31	0	17	0	31	1	93.5484	0	54.8387
149	1	0	control	0	2	0	8	0	0	0	14	0	0	0	0	0	0	0	0	0	22	0	0	22	22	0	8	0	22	1	100	0	36.3636
150	1	0	control	0	3	0	4	0	0	0	6	0	0	0	0	0	0	0	0	0	10	0	0	10	10	0	4	0	10	1	100	0	40
151	1	0	control	0	4	1	4	0	0	0	2	0	0	0	0	0	0	0	1	0	6	0	1	6	7	0	5	0	7	1	85.7143	0	71.4286
152	1	0	control	0	5	0	6	0	0	1	3	0	0	0	0	0	0	0	1	0	9	0	1	9	10	0	6	0	10	1	90	0	60
153	1	0	control	0	6	0	10	0	0	0	6	0	0	0	0	0	0	0	0	0	16	0	0	16	16	0	10	0	16	1	100	0	62.5
154	1	0	control	0	7	0	4	0	0	1	4	0	0	0	0	0	0	0	1	0	8	0	1	8	9	0	4	0	9	1	88.8889	0	44.4444
155	1	0	control	0	8	0	2	0	0	0	6	0	0	0	0	0	0	0	0	0	8	0	0	8	8	0	2	0	8	1	100	0	25
156	1	0	control	0	9	0	14	0	0	0	9	0	0	0	0	0	0	0	0	0	23	0	0	23	23	0	14	0	23	1	100	0	60.8696
157	1	0	control	0	1	0	10	0	0	0	15	0	0	0	0	0	0	0	0	0	25	0	0	25	25	0	10	0	25	1	100	0	40
158	1	0	control	0	2	0	12	0	0	0	7	0	0	0	0	0	0	0	0	0	19	0	0	19	19	0	12	0	19	1	100	0	63.1579
159	1	0	control	0	3	0	21	0	0	0	5	0	0	0	0	0	0	0	0	0	26	0	0	26	26	0	21	0	26	1	100	0	80.7692
160	1	0	control	0	4	0	18	0	0	0	6	0	0	0	0	0	0	0	0	0	24	0	0	24	24	0	18	0	24	1	100	0	75
161	1	0	control	0	5	0	12	0	0	0	2	0	0	0	0	0	0	0	0	0	14	0	0	14	14	0	12	0	14	1	100	0	85.7143
162	1	0	control	0	6	0	3	0	0	0	6	0	0	0	0	0	0	0	0	0	9	0	0	9	9	0	3	0	9	1	100	0	33.3333
163	1	0	control	0	7	0	1	0	0	0	8	0	0	0	0	0	0	0	0	0	9	0	0	9	9	0	1	0	9	1	100	0	11.1111
164	1	0	control	0	8	0	5	0	0	0	14	0	0	0	0	0	0	0	0	0	19	0	0	19	19	0	5	0	19	1	100	0	26.3158
165	1	0	control	0	9	0	9	0	0	0	11	0	0	0	0	0	0	0	0	0	20	0	0	20	20	0	9	0	20	1	100	0	45
166	1	0	control	0	1	0	22	0	0	0	14	0	0	0	0	0	0	0	0	0	36	0	0	36	36	0	22	0	36	1	100	0	61.1111
167	1	0	control	0	2	0	12	0	0	0	16	0	0	0	0	0	0	0	0	0	28	0	0	28	28	0	12	0	28	1	100	0	42.8571
168	1	0	control	0	3	0	18	0	0	0	41	0	0	0	0	0	0	0	0	0	59	0	0	59	59	0	18	0	59	1	100	0	30.5085
169	1	0	control	0	4	0	13	0	0	0	13	0	0	0	0	0	0	0	0	0	26	0	0	26	26	0	13	0	26	1	100	0	50
170	1	0	control	0	5	0	17	0	0	0	12	0	0	0	0	0	0	0	0	0	29	0	0	29	29	0	17	0	29	1	100	0	58.6207
171	1	0	control	0	6	0	23	0	0	0	41	0	0	0	0	0	0	0	0	0	64	0	0	64	64	0	23	0	64	1	100	0	35.9375
172	1	0	control	0	7	0	12	0	0	0	35	0	0	0	0	0	0	0	0	0	47	0	0	47	47	0	12	0	47	1	100	0	25.5319
173	1	0	control	0	8	0	24	0	0	0	33	0	0	0	0	0	0	0	0	0	57	0	0	57	57	0	24	0	57	1	100	0	42.1053
174	1	0	control	0	9	0	48	0	0	0	42	0	0	0	0	0	0	0	0	0	90	0	0	90	90	0	48	0	90	1	100	0	53.3333
175	1	0	control	0	1	0	10	0	0	0	39	0	0	0	0	0	0	0	0	0	49	0	0	49	49	0	10	0	49	1	100	0	20.4082
176	1	0	control	0	2	0	14	0	0	0	41	0	0	0	0	0	0	0	0	0	55	0	0	55	55	0	14	0	55	1	100	0	25.4545
177	1	0	control	0	3	0	32	0	0	0	36	0	0	0	0	0	0	0	0	0	68	0	0	68	68	0	32	0	68	1	100	0	47.0588
178	1	0	control	0	4	0	40	0	0	0	9	0	0	0	0	0	0	0	0	0	49	0	0	49	49	0	40	0	49	1	100	0	81.6327
179	1	0	control	0	5	0	9	0	0	0	4	0	0	0	0	0	0	0	0	0	13	0	0	13	13	0	9	0	13	1	100	0	69.2308
180	1	0	control	0	6	0	2	0	0	0	21	0	0	0	0	0	0	0	0	0	23	0	0	23	23	0	2	0	23	1	100	0	8.69565
181	1	0	control	0	7	0	12	0	0	0	12	0	0	0	0	0	0	0	0	0	24	0	0	24	24	0	12	0	24	1	100	0	50
182	1	0	control	0	8	2	4	0	0	0	12	0	0	0	0	0	0	0	2	0	16	0	2	16	18	0	6	0	18	1	88.8889	0	33.3333
183	1	0	control	0	9	0	11	0	0	0	8	0	0	0	0	0	0	0	0	0	19	0	0	19	19	0	11	0	19	1	100	0	57.8947
184	1	0	control	0	1	0	8	0	0	0	13	0	0	0	0	0	0	0	0	0	21	0	0	21	21	0	8	0	21	1	100	0	38.0952
185	1	0	control	0	2	0	3	0	0	0	10	0	0	0	0	0	0	0	0	0	13	0	0	13	13	0	3	0	13	1	100	0	23.0769
186	1	0	control	0	3	0	8	0	0	0	19	0	0	0	0	0	0	0	0	0	27	0	0	27	27	0	8	0	27	1	100	0	29.6296
187	1	0	control	0	4	0	15	0	0	0	8	0	0	0	0	0	0	0	0	0	23	0	0	23	23	0	15	0	23	1	100	0	65.2174
188	1	0	control	0	5	0	2	0	0	0	9	0	0	0	0	0	0	0	0	0	11	0	0	11	11	0	2	0	11	1	100	0	18.1818
189	1	0	control	0	6	0	19	0	0	0	1	0	0	0	0	0	0	0	0	0	20	0	0	20	20	0	19	0	20	1	100	0	95
190	1	0	control	0	7	0	11	0	0	0	17	0	0	0	0	0	0	0	0	0	28	0	0	28	28	0	11	0	28	1	100	0	39.2857
191	1	0	control	0	8	0	6	0	0	0	12	0	0	0	0	0	0	0	0	0	18	0	0	18	18	0	6	0	18	1	100	0	33.3333
192	1	0	control	0	9	0	1	0	0	0	4	0	0	0	0	0	0	0	0	0	5	0	0	5	5	0	1	0	5	1	100	0	20
193	1	0	control	0	1	0	6	0	0	0	14	0	0	0	0	0	0	0	0	0	20	0	0	20	20	0	6	0	20	1	100	0	30
194	1	0	control	0	2	0	2	0	0	0	15	0	0	0	0	0	0	0	0	0	17	0	0	17	17	0	2	0	17	1	100	0	11.7647
195	1	0	control	0	3	0	5	0	0	0	10	0	0	0	0	0	0	0	0	0	15	0	0	15	15	0	5	0	15	1	100	0	33.3333
196	1	0	control	0	4	0	2	0	0	0	1	0	0	0	0	0	0	0	0	0	3	0	0	3	3	0	2	0	3	1	100	0	66.6667
197	1	0	control	0	5	0	3	0	0	2	4	0	0	0	0	0	0	0	2	0	7	0	2	7	9	0	3	0	9	1	77.7778	0	33.3333
198	1	0	control	0	6	2	1	0	0	0	9	0	0	0	0	0	0	0	2	0	10	0	2	10	12	0	3	0	12	1	83.3333	0	25
199	1	0	control	0	7	0	4	0	0	0	0	0	0	0	0	0	0	0	0	0	4	0	0	4	4	0	4	0	4	1	100	0	100
200	1	0	control	0	8	1	0	0	0	0	3	0	0	0	0	0	0	0	1	0	3	0	1	3	4	0	1	0	4	1	75	0	25
201	1	0	control	0	9	0	1	0	0	0	1	0	0	0	0	0	0	0	0	0	2	0	0	2	2	0	1	0	2	1	100	0	50
202	1	0	control	0	1	0	3	0	0	0	7	0	0	0	0	0	0	0	0	0	10	0	0	10	10	0	3	0	10	1	100	0	30
203	1	0	control	0	2	0	2	0	0	0	14	0	0	0	0	0	0	0	0	0	16	0	0	16	16	0	2	0	16	1	100	0	12.5
204	1	0	control	0	3	0	3	0	0	0	31	0	0	0	0	0	0	0	0	0	34	0	0	34	34	0	3	0	34	1	100	0	8.82353
205	1	0	control	0	4	0	9	0	0	0	2	0	0	0	0	0	0	0	0	0	11	0	0	11	11	0	9	0	11	1	100	0	81.8182
206	1	0	control	0	5	0	3	0	0	0	2	0	0	0	0	0	0	0	0	0	5	0	0	5	5	0	3	0	5	1	100	0	60
207	1	0	control	0	6	0	6	0	0	0	0	0	0	0	0	0	0	0	0	0	6	0	0	6	6	0	6	0	6	1	100	0	100
208	1	0	control	0	7	0	3	0	0	0	8	0	0	0	0	0	0	0	0	0	11	0	0	11	11	0	3	0	11	1	100	0	27.2727
209	1	0	control	0	8	0	4	0	0	0	3	0	0	0	0	0	0	0	0	0	7	0	0	7	7	0	4	0	7	1	100	0	57.1429
210	1	0	control	0	9	0	0	0	0	0	9	0	0	0	0	0	0	0	0	0	9	0	0	9	9	0	0	0	9	1	100	0	0
211	1	0	control	0	1	0	8	0	0	0	0	0	0	0	0	0	0	0	0	0	8	0	0	8	8	0	8	0	8	1	100	0	100
212	1	0	control	0	2	0	4	0	0	0	6	0	0	0	0	0	0	0	0	0	10	0	0	10	10	0	4	0	10	1	100	0	40
213	1	0	control	0	3	0	3	0	0	0	3	0	0	0	0	0	0	0	0	0	6	0	0	6	6	0	3	0	6	1	100	0	50
214	1	0	control	0	4	0	3	0	0	0	1	0	0	0	0	0	0	0	0	0	4	0	0	4	4	0	3	0	4	1	100	0	75
216	1	0	control	0	6	0	4	0	0	0	1	0	0	0	0	0	0	0	0	0	5	0	0	5	5	0	4	0	5	1	100	0	80
217	1	0	control	0	7	0	3	0	0	0	2	0	0	0	0	0	0	0	0	0	5	0	0	5	5	0	3	0	5	1	100	0	60
218	1	0	control	0	8	0	2	0	0	1	2	0	0	0	0	0	0	0	1	0	4	0	1	4	5	0	2	0	5	1	80	0	40
219	1	0	control	0	9	0	0	0	0	0	1	0	0	0	0	0	0	0	0	0	1	0	0	1	1	0	0	0	1	1	100	0	0
220	1	0	control	0	1	0	3	0	0	0	3	0	0	0	0	0	0	0	0	0	6	0	0	6	6	0	3	0	6	1	100	0	50
221	1	0	control	0	2	1	2	0	0	0	2	0	0	0	0	0	0	0	1	0	4	0	1	4	5	0	3	0	5	1	80	0	60
222	1	0	control	0	3	1	1	0	0	0	5	0	0	0	0	0	0	0	1	0	6	0	1	6	7	0	2	0	7	1	85.7143	0	28.5714
223	1	0	control	0	4	1	1	0	0	1	0	0	0	0	0	0	0	0	2	0	1	0	2	1	3	0	2	0	3	1	33.3333	0	66.6667
224	1	0	control	0	5	0	1	0	0	0	0	0	0	0	0	0	0	0	0	0	1	0	0	1	1	0	1	0	1	1	100	0	100
226	1	0	control	0	7	0	2	0	0	0	0	0	0	0	0	0	0	0	0	0	2	0	0	2	2	0	2	0	2	1	100	0	100
227	1	0	control	0	8	1	2	0	0	0	2	0	0	0	0	0	0	0	1	0	4	0	1	4	5	0	3	0	5	1	80	0	60
228	1	0	control	0	9	0	2	0	0	0	3	0	0	0	0	0	0	0	0	0	5	0	0	5	5	0	2	0	5	1	100	0	40
229	1	0	control	0	1	0	3	0	0	0	1	0	0	0	0	0	0	0	0	0	4	0	0	4	4	0	3	0	4	1	100	0	75
232	1	0	control	0	4	0	1	0	0	0	0	0	0	0	0	0	0	0	0	0	1	0	0	1	1	0	1	0	1	1	100	0	100
233	1	0	control	0	5	0	1	0	0	0	0	0	0	0	0	0	0	0	0	0	1	0	0	1	1	0	1	0	1	1	100	0	100
234	1	0	control	0	6	2	0	0	0	0	5	0	0	0	0	0	0	0	2	0	5	0	2	5	7	0	2	0	7	1	71.4286	0	28.5714
235	1	0	control	0	7	0	0	0	0	0	2	0	0	0	0	0	0	0	0	0	2	0	0	2	2	0	0	0	2	1	100	0	0
236	1	0	control	0	8	0	2	0	0	0	0	0	0	0	0	0	0	0	0	0	2	0	0	2	2	0	2	0	2	1	100	0	100
240	1	0	control	0	3	0	0	0	0	0	2	0	0	0	0	0	0	0	0	0	2	0	0	2	2	0	0	0	2	1	100	0	0
252	1	0	control	0	6	0	0	0	0	0	2	0	0	0	0	0	0	0	0	0	2	0	0	2	2	0	0	0	2	1	100	0	0
254	1	0	control	0	8	0	0	0	0	0	1	0	0	0	0	0	0	0	0	0	1	0	0	1	1	0	0	0	1	1	100	0	0
258	1	0	control	0	3	0	0	0	0	0	1	0	0	0	0	0	0	0	0	0	1	0	0	1	1	0	0	0	1	1	100	0	0
260	1	0	control	0	5	0	1	0	0	0	3	0	0	0	0	0	0	0	0	0	4	0	0	4	4	0	1	0	4	1	100	0	25
261	1	0	control	0	6	0	1	0	0	0	1	0	0	0	0	0	0	0	0	0	2	0	0	2	2	0	1	0	2	1	100	0	50
262	1	0	control	0	7	0	1	0	0	0	1	0	0	0	0	0	0	0	0	0	2	0	0	2	2	0	1	0	2	1	100	0	50
263	1	0	control	0	8	0	4	0	0	0	5	0	0	0	0	0	0	0	0	0	9	0	0	9	9	0	4	0	9	1	100	0	44.4444
264	1	0	control	0	9	0	1	0	0	0	2	0	0	0	0	0	0	0	0	0	3	0	0	3	3	0	1	0	3	1	100	0	33.3333
265	1	0	control	0	1	0	1	0	0	0	2	0	1	0	0	0	0	0	0	0	3	1	0	4	3	1	1	0	4	1	100	25	25
266	1	0	control	0	2	0	1	0	0	0	0	0	0	0	0	0	0	0	0	0	1	0	0	1	1	0	1	0	1	1	100	0	100
267	1	0	control	0	3	0	0	0	0	0	2	0	0	0	0	0	0	0	0	0	2	0	0	2	2	0	0	0	2	1	100	0	0
268	1	0	control	0	4	0	1	0	0	0	4	0	0	0	0	0	0	0	0	0	5	0	0	5	5	0	1	0	5	1	100	0	20
270	1	0	control	0	6	0	1	0	0	0	4	0	0	0	0	0	0	0	0	0	5	0	0	5	5	0	1	0	5	1	100	0	20
271	1	0	control	0	7	0	3	0	0	1	2	0	0	0	0	0	0	0	1	0	5	0	1	5	6	0	3	0	6	1	83.3333	0	50
272	1	0	control	0	8	0	4	0	0	0	1	0	0	0	0	0	0	0	0	0	5	0	0	5	5	0	4	0	5	1	100	0	80
273	1	0	control	0	9	0	1	0	0	0	1	0	0	0	0	0	0	0	0	0	2	0	0	2	2	0	1	0	2	1	100	0	50
274	1	0	control	0	1	0	1	0	0	0	3	0	0	0	0	0	0	0	0	0	4	0	0	4	4	0	1	0	4	1	100	0	25
275	1	0	control	0	2	0	1	0	0	0	3	0	0	0	0	0	0	0	0	0	4	0	0	4	4	0	1	0	4	1	100	0	25
276	1	0	control	0	3	0	6	0	0	0	8	0	0	0	0	0	0	0	0	0	14	0	0	14	14	0	6	0	14	1	100	0	42.8571
277	1	0	control	0	4	0	3	0	0	0	6	0	0	0	0	0	0	0	0	0	9	0	0	9	9	0	3	0	9	1	100	0	33.3333
278	1	0	control	0	5	0	1	0	0	0	0	0	0	0	0	0	0	0	0	0	1	0	0	1	1	0	1	0	1	1	100	0	100
279	1	0	control	0	6	1	0	0	0	0	3	0	0	0	0	0	0	0	1	0	3	0	1	3	4	0	1	0	4	1	75	0	25
282	1	0	control	0	9	0	0	0	0	0	1	0	0	0	0	0	0	0	0	0	1	0	0	1	1	0	0	0	1	1	100	0	0
285	1	0	control	0	3	0	2	0	0	0	1	0	0	0	0	0	0	0	0	0	3	0	0	3	3	0	2	0	3	1	100	0	66.6667
287	1	0	control	0	5	0	2	0	0	0	3	0	0	0	0	0	0	0	0	0	5	0	0	5	5	0	2	0	5	1	100	0	40
288	1	0	control	0	6	1	2	0	0	0	2	0	0	0	0	0	0	0	1	0	4	0	1	4	5	0	3	0	5	1	80	0	60
1	2	1	Pirikool Cement R1	1	2	0	0	0	2	0	0	0	0	0	0	0	0	2	0	0	0	2	0	2	0	2	2	0	2	1	100	100	100
2	2	1	Pirikool Cement R1	1	3	0	0	0	2	0	0	0	0	0	0	0	0	0	0	0	0	2	0	2	0	2	2	0	2	1	100	100	100
4	2	1	Pirikool Cement R1	1	5	0	0	0	1	0	0	0	0	0	0	0	0	1	0	0	0	1	0	1	0	1	1	0	1	1	100	100	100
5	2	1	Pirikool Cement R1	1	6	0	0	0	1	0	0	0	0	0	0	0	0	0	0	0	0	1	0	1	0	1	1	0	1	1	100	100	100
6	2	1	Pirikool Cement R1	1	7	0	0	0	0	0	0	0	2	0	0	0	0	1	0	0	0	2	0	2	0	2	0	0	2	1	100	100	0
8	2	1	Pirikool Cement R1	1	9	0	0	0	2	0	0	0	1	0	0	0	0	3	0	0	0	3	0	3	0	3	2	0	3	1	100	100	66.6667
9	2	1	Pirikool Cement R1	1	1	0	0	0	4	0	0	0	0	0	0	0	0	2	0	0	0	4	0	4	0	4	4	0	4	1	100	100	100
10	2	1	Pirikool Cement R1	1	2	0	1	0	3	0	0	0	0	0	0	0	0	2	0	0	1	3	0	4	1	3	4	0	4	1	100	75	100
11	2	1	Pirikool Cement R1	1	3	0	2	0	4	0	0	0	0	0	0	0	0	3	0	0	2	4	0	6	2	4	6	0	6	1	100	66.6667	100
12	2	1	Pirikool Cement R1	1	4	0	0	0	1	0	0	0	0	0	0	0	0	0	0	0	0	1	0	1	0	1	1	0	1	1	100	100	100
14	2	1	Pirikool Cement R1	1	6	1	2	0	9	0	0	0	0	0	0	0	0	0	1	0	2	9	1	11	3	9	12	0	12	1	91.6667	75	100
15	2	1	Pirikool Cement R1	1	7	0	0	0	1	0	0	2	4	0	0	0	0	6	0	2	0	5	2	5	0	7	1	0	7	1	71.4286	100	14.2857
16	2	1	Pirikool Cement R1	1	8	0	0	0	0	0	0	0	3	0	0	0	0	3	0	0	0	3	0	3	0	3	0	0	3	1	100	100	0
17	2	1	Pirikool Cement R1	1	9	0	1	0	3	0	0	0	0	0	0	0	0	3	0	0	1	3	0	4	1	3	4	0	4	1	100	75	100
18	2	1	Pirikool Cement R1	1	1	0	0	0	3	0	0	0	3	0	0	0	0	6	0	0	0	6	0	6	0	6	3	0	6	1	100	100	50
19	2	1	Pirikool Cement R1	1	2	0	1	0	10	0	0	0	4	0	0	0	0	11	0	0	1	14	0	15	1	14	11	0	15	1	100	93.3333	73.3333
20	2	1	Pirikool Cement R1	1	3	0	2	0	3	0	0	0	9	0	0	0	0	12	0	0	2	12	0	14	2	12	5	0	14	1	100	85.7143	35.7143
21	2	1	Pirikool Cement R1	1	4	0	0	0	2	0	0	0	7	0	0	0	0	9	0	0	0	9	0	9	0	9	2	0	9	1	100	100	22.2222
22	2	1	Pirikool Cement R1	1	5	0	0	0	4	0	0	1	4	0	0	0	0	9	0	1	0	8	1	8	0	9	4	0	9	1	88.8889	100	44.4444
23	2	1	Pirikool Cement R1	1	6	0	0	1	18	0	0	0	6	0	0	0	0	23	0	1	0	24	1	24	0	25	19	0	25	1	96	100	76
24	2	1	Pirikool Cement R1	1	7	0	3	1	15	0	0	0	5	0	0	0	0	20	0	1	3	20	1	23	3	21	19	0	24	1	95.8333	87.5	79.1667
25	2	1	Pirikool Cement R1	1	8	0	1	2	4	0	0	0	4	0	0	0	0	10	0	2	1	8	2	9	1	10	7	0	11	1	81.8182	90.9091	63.6364
26	2	1	Pirikool Cement R1	1	9	0	0	0	6	0	0	0	5	0	0	0	0	11	0	0	0	11	0	11	0	11	6	0	11	1	100	100	54.5455
27	2	1	Pirikool Cement R1	1	1	0	0	0	4	0	0	0	8	0	0	0	0	12	0	0	0	12	0	12	0	12	4	0	12	1	100	100	33.3333
28	2	1	Pirikool Cement R1	1	2	0	0	0	5	0	0	0	5	0	0	0	0	9	0	0	0	10	0	10	0	10	5	0	10	1	100	100	50
29	2	1	Pirikool Cement R1	1	3	0	0	0	6	0	0	0	4	0	0	0	0	10	0	0	0	10	0	10	0	10	6	0	10	1	100	100	60
30	2	1	Pirikool Cement R1	1	4	0	0	0	3	0	0	0	4	0	0	0	0	7	0	0	0	7	0	7	0	7	3	0	7	1	100	100	42.8571
31	2	1	Pirikool Cement R1	1	5	0	0	0	1	0	0	0	4	0	0	0	0	5	0	0	0	5	0	5	0	5	1	0	5	1	100	100	20
32	2	1	Pirikool Cement R1	1	6	0	0	0	9	0	0	0	1	0	0	0	0	8	0	0	0	10	0	10	0	10	9	0	10	1	100	100	90
33	2	1	Pirikool Cement R1	1	7	0	1	0	5	0	0	0	7	0	0	0	0	11	0	0	1	12	0	13	1	12	6	0	13	1	100	92.3077	46.1538
34	2	1	Pirikool Cement R1	1	8	0	2	0	1	0	0	0	1	0	0	0	0	2	0	0	2	2	0	4	2	2	3	0	4	1	100	50	75
35	2	1	Pirikool Cement R1	1	9	0	0	0	5	0	0	0	3	0	0	0	0	8	0	0	0	8	0	8	0	8	5	0	8	1	100	100	62.5
36	2	1	Pirikool Cement R1	1	1	0	0	0	7	0	0	0	2	0	0	0	0	6	0	0	0	9	0	9	0	9	7	0	9	1	100	100	77.7778
37	2	1	Pirikool Cement R1	1	2	0	0	0	2	0	0	0	6	0	0	0	0	7	0	0	0	8	0	8	0	8	2	0	8	1	100	100	25
38	2	1	Pirikool Cement R1	1	3	0	1	0	3	0	0	0	3	0	0	0	0	5	0	0	1	6	0	7	1	6	4	0	7	1	100	85.7143	57.1429
39	2	1	Pirikool Cement R1	1	4	0	0	0	1	0	0	0	13	0	0	0	0	14	0	0	0	14	0	14	0	14	1	0	14	1	100	100	7.14286
40	2	1	Pirikool Cement R1	1	5	0	1	0	8	0	0	0	8	0	0	0	0	16	0	0	1	16	0	17	1	16	9	0	17	1	100	94.1176	52.9412
41	2	1	Pirikool Cement R1	1	6	0	0	0	3	0	0	0	6	0	0	0	0	9	0	0	0	9	0	9	0	9	3	0	9	1	100	100	33.3333
42	2	1	Pirikool Cement R1	1	7	0	2	0	11	0	0	0	12	0	0	0	0	21	0	0	2	23	0	25	2	23	13	0	25	1	100	92	52
43	2	1	Pirikool Cement R1	1	8	0	1	0	9	0	0	0	4	0	0	0	0	13	0	0	1	13	0	14	1	13	10	0	14	1	100	92.8571	71.4286
44	2	1	Pirikool Cement R1	1	9	0	2	0	25	0	0	0	19	0	0	0	0	42	0	0	2	44	0	46	2	44	27	0	46	1	100	95.6522	58.6957
45	2	1	Pirikool Cement R1	1	1	0	0	0	18	0	0	0	7	0	0	0	0	23	0	0	0	25	0	25	0	25	18	0	25	1	100	100	72
46	2	1	Pirikool Cement R1	1	2	1	0	4	14	0	0	1	19	0	0	0	0	38	1	5	0	33	6	33	1	38	19	0	39	1	84.6154	97.4359	48.7179
47	2	1	Pirikool Cement R1	1	3	0	1	0	15	0	0	0	33	0	0	0	0	48	0	0	1	48	0	49	1	48	16	0	49	1	100	97.9592	32.6531
48	2	1	Pirikool Cement R1	1	4	0	0	3	31	0	0	0	25	0	0	0	0	58	0	3	0	56	3	56	0	59	34	0	59	1	94.9153	100	57.6271
49	2	1	Pirikool Cement R1	1	5	0	3	0	35	0	0	0	5	0	0	0	0	30	0	0	3	40	0	43	3	40	38	0	43	1	100	93.0233	88.3721
50	2	1	Pirikool Cement R1	1	6	0	0	1	14	0	0	2	5	0	0	0	0	22	0	3	0	19	3	19	0	22	15	0	22	1	86.3636	100	68.1818
51	2	1	Pirikool Cement R1	1	7	0	0	0	18	0	0	0	27	0	0	0	0	44	0	0	0	45	0	45	0	45	18	0	45	1	100	100	40
52	2	1	Pirikool Cement R1	1	8	0	0	2	12	0	0	0	6	0	0	0	0	15	0	2	0	18	2	18	0	20	14	0	20	1	90	100	70
53	2	1	Pirikool Cement R1	1	9	0	1	4	47	0	0	5	44	0	0	0	0	99	0	9	1	91	9	92	1	100	52	0	101	1	91.0891	99.0099	51.4851
54	2	1	Pirikool Cement R1	1	1	0	1	1	37	0	0	1	27	0	0	0	0	63	0	2	1	64	2	65	1	66	39	0	67	1	97.0149	98.5075	58.209
67	2	1	Pirikool Cement R1	1	2	0	0	0	9	0	0	0	23	0	0	0	0	32	0	0	0	32	0	32	0	32	9	0	32	1	100	100	28.125
68	2	1	Pirikool Cement R1	1	3	0	1	0	25	0	0	2	40	0	0	0	0	67	0	2	1	65	2	66	1	67	26	0	68	1	97.0588	98.5294	38.2353
69	2	1	Pirikool Cement R1	1	4	0	0	1	31	0	0	3	36	0	0	0	0	70	0	4	0	67	4	67	0	71	32	0	71	1	94.3662	100	45.0704
70	2	1	Pirikool Cement R1	1	5	0	0	0	12	0	0	0	23	0	0	0	0	34	0	0	0	35	0	35	0	35	12	0	35	1	100	100	34.2857
71	2	1	Pirikool Cement R1	1	6	0	0	0	5	0	0	0	2	0	0	0	0	7	0	0	0	7	0	7	0	7	5	0	7	1	100	100	71.4286
72	2	1	Pirikool Cement R1	1	7	0	0	5	13	0	0	1	3	0	0	0	0	20	0	6	0	16	6	16	0	22	18	0	22	1	72.7273	100	81.8182
73	2	1	Pirikool Cement R1	1	8	0	0	0	15	0	0	3	14	0	0	0	0	29	0	3	0	29	3	29	0	32	15	0	32	1	90.625	100	46.875
74	2	1	Pirikool Cement R1	1	9	0	0	1	9	0	0	2	23	0	0	0	0	28	0	3	0	32	3	32	0	35	10	0	35	1	91.4286	100	28.5714
75	2	1	Pirikool Cement R1	1	1	0	0	1	15	0	0	1	16	0	0	0	0	29	0	2	0	31	2	31	0	33	16	0	33	1	93.9394	100	48.4848
76	2	1	Pirikool Cement R1	1	2	0	0	1	23	0	0	2	17	0	0	0	0	37	0	3	0	40	3	40	0	43	24	0	43	1	93.0233	100	55.814
77	2	1	Pirikool Cement R1	1	3	0	0	1	21	0	0	2	23	0	0	0	0	46	0	3	0	44	3	44	0	47	22	0	47	1	93.617	100	46.8085
78	2	1	Pirikool Cement R1	1	4	2	-1	3	11	0	0	0	25	0	0	0	0	38	2	3	-1	36	5	35	1	39	15	0	40	1	87.5	97.5	37.5
79	2	1	Pirikool Cement R1	1	5	0	0	0	4	0	0	3	3	0	0	0	0	7	0	3	0	7	3	7	0	10	4	0	10	1	70	100	40
80	2	1	Pirikool Cement R1	1	6	0	0	1	21	0	0	0	27	0	0	0	0	46	0	1	0	48	1	48	0	49	22	0	49	1	97.9592	100	44.898
81	2	1	Pirikool Cement R1	1	7	0	0	1	13	0	0	1	14	0	0	0	0	28	0	2	0	27	2	27	0	29	14	0	29	1	93.1034	100	48.2759
82	2	1	Pirikool Cement R1	1	8	0	0	0	5	0	0	1	15	0	0	0	0	21	0	1	0	20	1	20	0	21	5	0	21	1	95.2381	100	23.8095
83	2	1	Pirikool Cement R1	1	9	0	0	1	2	0	0	0	6	0	0	0	0	7	0	1	0	8	1	8	0	9	3	0	9	1	88.8889	100	33.3333
84	2	1	Pirikool Cement R1	1	1	0	0	1	1	0	0	2	6	0	0	0	0	9	0	3	0	7	3	7	0	10	2	0	10	1	70	100	20
85	2	1	Pirikool Cement R1	1	2	0	0	1	2	0	0	0	0	0	0	0	0	2	0	1	0	2	1	2	0	3	3	0	3	1	66.6667	100	100
86	2	1	Pirikool Cement R1	1	3	0	0	0	3	0	0	0	6	0	0	0	0	8	0	0	0	9	0	9	0	9	3	0	9	1	100	100	33.3333
87	2	1	Pirikool Cement R1	1	4	0	0	2	4	0	0	0	4	0	0	0	0	6	0	2	0	8	2	8	0	10	6	0	10	1	80	100	60
88	2	1	Pirikool Cement R1	1	5	0	0	1	4	0	0	0	10	0	0	0	0	15	0	1	0	14	1	14	0	15	5	0	15	1	93.3333	100	33.3333
89	2	1	Pirikool Cement R1	1	6	0	0	0	9	0	0	1	14	0	0	0	0	23	0	1	0	23	1	23	0	24	9	0	24	1	95.8333	100	37.5
90	2	1	Pirikool Cement R1	1	7	0	0	0	6	0	0	0	13	0	0	0	0	19	0	0	0	19	0	19	0	19	6	0	19	1	100	100	31.5789
91	2	1	Pirikool Cement R1	1	8	0	0	0	0	0	0	2	9	0	0	0	0	11	0	2	0	9	2	9	0	11	0	0	11	1	81.8182	100	0
92	2	1	Pirikool Cement R1	1	9	0	0	1	14	0	0	0	16	0	0	0	0	28	0	1	0	30	1	30	0	31	15	0	31	1	96.7742	100	48.3871
93	2	1	Pirikool Cement R1	1	1	0	0	0	34	0	0	1	32	0	0	0	0	67	0	1	0	66	1	66	0	67	34	0	67	1	98.5075	100	50.7463
94	2	1	Pirikool Cement R1	1	2	0	0	0	8	0	0	0	28	0	0	0	0	35	0	0	0	36	0	36	0	36	8	0	36	1	100	100	22.2222
95	2	1	Pirikool Cement R1	1	3	0	1	0	8	0	0	0	12	0	0	0	0	17	0	0	1	20	0	21	1	20	9	0	21	1	100	95.2381	42.8571
96	2	1	Pirikool Cement R1	1	4	0	0	0	5	0	0	0	15	0	0	0	0	17	0	0	0	20	0	20	0	20	5	0	20	1	100	100	25
97	2	1	Pirikool Cement R1	1	5	0	0	0	6	0	0	0	22	0	0	0	0	28	0	0	0	28	0	28	0	28	6	0	28	1	100	100	21.4286
98	2	1	Pirikool Cement R1	1	6	0	1	0	15	0	0	0	12	0	0	0	0	22	0	0	1	27	0	28	1	27	16	0	28	1	100	96.4286	57.1429
99	2	1	Pirikool Cement R1	1	7	0	0	0	8	0	0	0	18	0	0	0	0	26	0	0	0	26	0	26	0	26	8	0	26	1	100	100	30.7692
100	2	1	Pirikool Cement R1	1	8	0	0	0	8	0	0	0	12	0	0	0	0	20	0	0	0	20	0	20	0	20	8	0	20	1	100	100	40
101	2	1	Pirikool Cement R1	1	9	0	0	0	4	0	0	0	13	0	0	0	0	17	0	0	0	17	0	17	0	17	4	0	17	1	100	100	23.5294
102	2	1	Pirikool Cement R1	1	1	0	0	0	7	0	0	0	14	0	0	0	0	20	0	0	0	21	0	21	0	21	7	0	21	1	100	100	33.3333
103	2	1	Pirikool Cement R1	1	2	0	0	0	12	0	0	0	10	0	0	0	0	22	0	0	0	22	0	22	0	22	12	0	22	1	100	100	54.5455
104	2	1	Pirikool Cement R1	1	3	0	0	0	15	0	0	0	27	0	0	0	0	42	0	0	0	42	0	42	0	42	15	0	42	1	100	100	35.7143
105	2	1	Pirikool Cement R1	1	4	0	0	0	8	0	0	0	13	0	0	0	0	21	0	0	0	21	0	21	0	21	8	0	21	1	100	100	38.0952
106	2	1	Pirikool Cement R1	1	5	0	0	0	16	0	0	0	8	0	0	0	0	22	0	0	0	24	0	24	0	24	16	0	24	1	100	100	66.6667
107	2	1	Pirikool Cement R1	1	6	0	0	0	6	0	0	0	10	0	0	0	0	16	0	0	0	16	0	16	0	16	6	0	16	1	100	100	37.5
108	2	1	Pirikool Cement R1	1	7	0	0	0	17	0	0	0	8	0	0	0	0	25	0	0	0	25	0	25	0	25	17	0	25	1	100	100	68
109	2	1	Pirikool Cement R1	1	8	0	0	0	7	0	0	0	3	0	0	0	0	10	0	0	0	10	0	10	0	10	7	0	10	1	100	100	70
110	2	1	Pirikool Cement R1	1	9	0	0	0	4	0	0	0	4	0	0	0	0	8	0	0	0	8	0	8	0	8	4	0	8	1	100	100	50
111	2	1	Pirikool Cement R1	1	1	0	0	0	6	0	0	0	0	0	0	0	0	4	0	0	0	6	0	6	0	6	6	0	6	1	100	100	100
112	2	1	Pirikool Cement R1	1	2	0	0	0	6	0	0	0	8	0	0	0	0	14	0	0	0	14	0	14	0	14	6	0	14	1	100	100	42.8571
113	2	1	Pirikool Cement R1	1	3	0	0	1	11	0	0	0	5	0	0	0	0	16	0	1	0	16	1	16	0	17	12	0	17	1	94.1176	100	70.5882
114	2	1	Pirikool Cement R1	1	4	0	0	0	7	0	0	0	2	0	0	0	0	8	0	0	0	9	0	9	0	9	7	0	9	1	100	100	77.7778
115	2	1	Pirikool Cement R1	1	5	0	0	0	4	0	0	0	0	0	0	0	0	4	0	0	0	4	0	4	0	4	4	0	4	1	100	100	100
116	2	1	Pirikool Cement R1	1	6	0	0	0	6	0	0	0	6	0	0	0	0	12	0	0	0	12	0	12	0	12	6	0	12	1	100	100	50
117	2	1	Pirikool Cement R1	1	7	0	0	0	4	0	0	0	3	0	0	0	0	7	0	0	0	7	0	7	0	7	4	0	7	1	100	100	57.1429
118	2	1	Pirikool Cement R1	1	8	0	0	0	3	0	0	0	0	0	0	0	0	3	0	0	0	3	0	3	0	3	3	0	3	1	100	100	100
119	2	1	Pirikool Cement R1	1	9	0	1	0	7	0	0	0	0	0	0	0	0	4	0	0	1	7	0	8	1	7	8	0	8	1	100	87.5	100
120	2	1	Pirikool Cement R1	1	1	0	1	0	5	0	0	0	4	0	0	0	0	8	0	0	1	9	0	10	1	9	6	0	10	1	100	90	60
121	2	1	Pirikool Cement R1	1	2	0	2	0	5	0	0	0	2	0	0	0	0	6	0	0	2	7	0	9	2	7	7	0	9	1	100	77.7778	77.7778
122	2	1	Pirikool Cement R1	1	3	0	0	0	4	0	0	0	10	0	0	0	0	13	0	0	0	14	0	14	0	14	4	0	14	1	100	100	28.5714
123	2	1	Pirikool Cement R1	1	4	0	0	0	3	0	0	0	9	0	0	0	0	12	0	0	0	12	0	12	0	12	3	0	12	1	100	100	25
125	2	1	Pirikool Cement R1	1	6	0	3	0	1	0	0	0	1	0	0	0	0	2	0	0	3	2	0	5	3	2	4	0	5	1	100	40	80
126	2	1	Pirikool Cement R1	1	7	0	1	0	3	0	0	0	1	0	0	0	0	4	0	0	1	4	0	5	1	4	4	0	5	1	100	80	80
127	2	1	Pirikool Cement R1	1	8	0	0	1	2	0	0	0	4	0	0	0	0	7	0	1	0	6	1	6	0	7	3	0	7	1	85.7143	100	42.8571
128	2	1	Pirikool Cement R1	1	9	0	0	0	2	0	0	0	4	0	0	0	0	6	0	0	0	6	0	6	0	6	2	0	6	1	100	100	33.3333
129	2	1	Pirikool Cement R1	1	1	0	1	0	3	0	0	0	6	0	0	0	0	9	0	0	1	9	0	10	1	9	4	0	10	1	100	90	40
130	2	1	Pirikool Cement R1	1	2	0	4	0	5	0	0	0	9	0	0	0	0	13	0	0	4	14	0	18	4	14	9	0	18	1	100	77.7778	50
131	2	1	Pirikool Cement R1	1	3	0	2	0	5	0	0	0	17	0	0	0	0	21	0	0	2	22	0	24	2	22	7	0	24	1	100	91.6667	29.1667
132	2	1	Pirikool Cement R1	1	4	0	6	0	5	0	0	0	7	0	0	0	0	12	0	0	6	12	0	18	6	12	11	0	18	1	100	66.6667	61.1111
133	2	1	Pirikool Cement R1	1	5	0	1	0	0	0	0	0	0	0	0	0	0	0	0	0	1	0	0	1	1	0	1	0	1	1	100	0	100
134	2	1	Pirikool Cement R1	1	6	0	0	0	8	0	0	0	3	0	0	0	0	9	0	0	0	11	0	11	0	11	8	0	11	1	100	100	72.7273
135	2	1	Pirikool Cement R1	1	7	0	4	0	2	0	0	0	6	0	0	0	0	7	0	0	4	8	0	12	4	8	6	0	12	1	100	66.6667	50
136	2	1	Pirikool Cement R1	1	8	0	0	0	5	0	0	0	1	0	0	0	0	4	0	0	0	6	0	6	0	6	5	0	6	1	100	100	83.3333
137	2	1	Pirikool Cement R1	1	9	0	0	0	8	0	0	0	5	0	0	0	0	8	0	0	0	13	0	13	0	13	8	0	13	1	100	100	61.5385
138	2	1	Pirikool Cement R1	1	1	0	5	0	5	0	0	0	5	0	0	0	0	8	0	0	5	10	0	15	5	10	10	0	15	1	100	66.6667	66.6667
139	2	1	Pirikool Cement R1	1	2	0	0	0	9	0	0	0	4	0	0	0	0	11	0	0	0	13	0	13	0	13	9	0	13	1	100	100	69.2308
140	2	1	Pirikool Cement R1	1	3	0	7	0	0	0	0	0	10	0	0	0	0	10	0	0	7	10	0	17	7	10	7	0	17	1	100	58.8235	41.1765
141	2	1	Pirikool Cement R1	1	4	0	4	0	3	0	0	0	6	0	0	0	0	8	0	0	4	9	0	13	4	9	7	0	13	1	100	69.2308	53.8462
142	2	1	Pirikool Cement R1	1	5	0	0	0	8	0	0	0	6	0	0	0	0	10	0	0	0	14	0	14	0	14	8	0	14	1	100	100	57.1429
143	2	1	Pirikool Cement R1	1	6	0	0	0	4	0	0	0	1	0	0	0	0	5	0	0	0	5	0	5	0	5	4	0	5	1	100	100	80
144	2	1	Pirikool Cement R1	1	7	0	1	1	8	0	0	0	3	0	0	0	0	10	0	1	1	11	1	12	1	12	10	0	13	1	92.3077	92.3077	76.9231
145	2	1	Pirikool Cement R1	1	8	0	1	0	3	0	0	0	2	0	0	0	0	5	0	0	1	5	0	6	1	5	4	0	6	1	100	83.3333	66.6667
146	2	1	Pirikool Cement R1	1	9	0	7	0	5	0	0	0	9	0	0	0	0	14	0	0	7	14	0	21	7	14	12	0	21	1	100	66.6667	57.1429
147	2	1	Pirikool Cement R1	1	1	3	6	0	6	0	0	0	1	0	0	0	0	7	3	0	6	7	3	13	9	7	15	0	16	1	81.25	43.75	93.75
148	2	1	Pirikool Cement R1	1	2	0	13	0	3	0	0	0	4	0	0	0	0	6	0	0	13	7	0	20	13	7	16	0	20	1	100	35	80
149	2	1	Pirikool Cement R1	1	3	0	0	0	4	0	0	0	14	0	0	0	0	15	0	0	0	18	0	18	0	18	4	0	18	1	100	100	22.2222
150	2	1	Pirikool Cement R1	1	4	0	3	2	12	0	0	0	4	0	0	0	0	18	0	2	3	16	2	19	3	18	17	0	21	1	90.4762	85.7143	80.9524
151	2	1	Pirikool Cement R1	1	5	0	3	0	2	0	0	0	0	0	0	0	0	2	0	0	3	2	0	5	3	2	5	0	5	1	100	40	100
152	2	1	Pirikool Cement R1	1	6	0	5	0	3	0	0	0	13	0	0	0	0	16	0	0	5	16	0	21	5	16	8	0	21	1	100	76.1905	38.0952
153	2	1	Pirikool Cement R1	1	7	0	4	0	3	0	0	0	3	0	0	0	0	6	0	0	4	6	0	10	4	6	7	0	10	1	100	60	70
154	2	1	Pirikool Cement R1	1	8	0	2	0	6	0	0	0	3	0	0	0	0	9	0	0	2	9	0	11	2	9	8	0	11	1	100	81.8182	72.7273
155	2	1	Pirikool Cement R1	1	9	0	3	0	0	0	0	0	0	0	0	0	0	0	0	0	3	0	0	3	3	0	3	0	3	1	100	0	100
156	2	1	Pirikool Cement R1	1	1	0	8	0	2	0	0	0	13	0	0	0	0	15	0	0	8	15	0	23	8	15	10	0	23	1	100	65.2174	43.4783
157	2	1	Pirikool Cement R1	1	2	0	6	0	2	0	0	0	2	0	0	0	0	4	0	0	6	4	0	10	6	4	8	0	10	1	100	40	80
158	2	1	Pirikool Cement R1	1	3	0	3	0	5	0	0	0	10	0	0	0	0	14	0	0	3	15	0	18	3	15	8	0	18	1	100	83.3333	44.4444
159	2	1	Pirikool Cement R1	1	4	0	12	0	4	0	0	0	6	0	0	0	0	9	0	0	12	10	0	22	12	10	16	0	22	1	100	45.4545	72.7273
160	2	1	Pirikool Cement R1	1	5	0	12	0	3	0	0	0	0	0	0	0	0	3	0	0	12	3	0	15	12	3	15	0	15	1	100	20	100
161	2	1	Pirikool Cement R1	1	6	0	2	0	1	0	0	0	3	0	0	0	0	4	0	0	2	4	0	6	2	4	3	0	6	1	100	66.6667	50
162	2	1	Pirikool Cement R1	1	7	0	3	0	2	0	0	0	4	0	0	0	0	6	0	0	3	6	0	9	3	6	5	0	9	1	100	66.6667	55.5556
163	2	1	Pirikool Cement R1	1	8	0	3	0	3	0	0	0	0	0	0	0	0	2	0	0	3	3	0	6	3	3	6	0	6	1	100	50	100
164	2	1	Pirikool Cement R1	1	9	0	1	0	4	0	0	0	6	0	0	0	0	10	0	0	1	10	0	11	1	10	5	0	11	1	100	90.9091	45.4545
165	2	1	Pirikool Cement R1	1	1	0	2	0	2	0	0	0	8	0	0	0	0	10	0	0	2	10	0	12	2	10	4	0	12	1	100	83.3333	33.3333
166	2	1	Pirikool Cement R1	1	2	0	1	0	2	0	0	0	10	0	0	0	0	12	0	0	1	12	0	13	1	12	3	0	13	1	100	92.3077	23.0769
167	2	1	Pirikool Cement R1	1	3	0	8	0	2	0	0	0	8	0	0	0	0	10	0	0	8	10	0	18	8	10	10	0	18	1	100	55.5556	55.5556
168	2	1	Pirikool Cement R1	1	4	0	16	0	6	0	0	0	16	0	0	0	0	21	0	0	16	22	0	38	16	22	22	0	38	1	100	57.8947	57.8947
169	2	1	Pirikool Cement R1	1	5	0	2	0	4	0	0	0	0	0	0	0	0	1	0	0	2	4	0	6	2	4	6	0	6	1	100	66.6667	100
170	2	1	Pirikool Cement R1	1	6	0	6	0	8	0	0	0	8	0	0	0	0	16	0	0	6	16	0	22	6	16	14	0	22	1	100	72.7273	63.6364
171	2	1	Pirikool Cement R1	1	7	0	3	0	4	0	0	0	10	0	0	0	0	14	0	0	3	14	0	17	3	14	7	0	17	1	100	82.3529	41.1765
172	2	1	Pirikool Cement R1	1	8	0	1	0	6	0	0	0	10	0	0	0	0	14	0	0	1	16	0	17	1	16	7	0	17	1	100	94.1176	41.1765
173	2	1	Pirikool Cement R1	1	9	0	7	0	3	0	0	0	9	0	0	0	0	11	0	0	7	12	0	19	7	12	10	0	19	1	100	63.1579	52.6316
174	2	1	Pirikool Cement R1	1	1	0	19	0	22	0	0	0	15	0	0	0	0	33	0	0	19	37	0	56	19	37	41	0	56	1	100	66.0714	73.2143
175	2	1	Pirikool Cement R1	1	2	0	2	0	5	0	0	0	60	0	0	0	0	63	0	0	2	65	0	67	2	65	7	0	67	1	100	97.0149	10.4478
176	2	1	Pirikool Cement R1	1	3	0	13	0	7	0	0	0	18	0	0	0	0	21	0	0	13	25	0	38	13	25	20	0	38	1	100	65.7895	52.6316
177	2	1	Pirikool Cement R1	1	4	0	11	0	24	0	0	0	24	0	0	0	0	47	0	0	11	48	0	59	11	48	35	0	59	1	100	81.3559	59.322
178	2	1	Pirikool Cement R1	1	5	0	9	0	5	0	0	0	0	0	0	0	0	5	0	0	9	5	0	14	9	5	14	0	14	1	100	35.7143	100
179	2	1	Pirikool Cement R1	1	6	0	12	0	7	0	0	2	25	0	0	0	0	34	0	2	12	32	2	44	12	34	19	0	46	1	95.6522	73.913	41.3043
180	2	1	Pirikool Cement R1	1	7	0	2	0	6	0	0	1	8	0	0	0	0	15	0	1	2	14	1	16	2	15	8	0	17	1	94.1176	88.2353	47.0588
181	2	1	Pirikool Cement R1	1	8	0	2	0	7	0	0	0	5	0	0	0	0	11	0	0	2	12	0	14	2	12	9	0	14	1	100	85.7143	64.2857
182	2	1	Pirikool Cement R1	1	9	0	0	0	2	0	0	0	0	0	0	0	0	2	0	0	0	2	0	2	0	2	2	0	2	1	100	100	100
183	2	1	Pirikool Cement R1	1	1	0	4	0	2	0	0	0	2	0	0	0	0	4	0	0	4	4	0	8	4	4	6	0	8	1	100	50	75
184	2	1	Pirikool Cement R1	1	2	0	1	0	1	0	0	0	16	0	0	0	0	17	0	0	1	17	0	18	1	17	2	0	18	1	100	94.4444	11.1111
185	2	1	Pirikool Cement R1	1	3	0	4	0	2	0	0	0	3	0	0	0	0	5	0	0	4	5	0	9	4	5	6	0	9	1	100	55.5556	66.6667
186	2	1	Pirikool Cement R1	1	4	0	24	0	4	0	0	0	21	0	0	0	0	23	0	0	24	25	0	49	24	25	28	0	49	1	100	51.0204	57.1429
187	2	1	Pirikool Cement R1	1	5	0	0	0	2	0	0	0	0	0	0	0	0	2	0	0	0	2	0	2	0	2	2	0	2	1	100	100	100
188	2	1	Pirikool Cement R1	1	6	0	19	0	6	0	0	0	0	0	0	0	0	6	0	0	19	6	0	25	19	6	25	0	25	1	100	24	100
189	2	1	Pirikool Cement R1	1	7	0	5	0	2	0	0	0	18	0	0	0	0	18	0	0	5	20	0	25	5	20	7	0	25	1	100	80	28
190	2	1	Pirikool Cement R1	1	8	0	1	0	3	0	0	0	5	0	0	0	0	8	0	0	1	8	0	9	1	8	4	0	9	1	100	88.8889	44.4444
191	2	1	Pirikool Cement R1	1	9	0	4	0	4	0	0	0	8	0	0	0	0	11	0	0	4	12	0	16	4	12	8	0	16	1	100	75	50
192	2	1	Pirikool Cement R1	1	1	0	5	0	4	0	0	0	6	0	0	0	0	10	0	0	5	10	0	15	5	10	9	0	15	1	100	66.6667	60
193	2	1	Pirikool Cement R1	1	2	0	3	0	7	0	0	0	7	0	0	0	0	14	0	0	3	14	0	17	3	14	10	0	17	1	100	82.3529	58.8235
194	2	1	Pirikool Cement R1	1	3	0	6	0	9	0	0	0	8	0	0	0	0	14	0	0	6	17	0	23	6	17	15	0	23	1	100	73.913	65.2174
195	2	1	Pirikool Cement R1	1	4	0	4	0	1	0	0	0	10	0	0	0	0	11	0	0	4	11	0	15	4	11	5	0	15	1	100	73.3333	33.3333
196	2	1	Pirikool Cement R1	1	5	0	1	0	0	0	0	0	3	0	0	0	0	3	0	0	1	3	0	4	1	3	1	0	4	1	100	75	25
197	2	1	Pirikool Cement R1	1	6	0	1	0	3	0	0	0	0	0	0	0	0	2	0	0	1	3	0	4	1	3	4	0	4	1	100	75	100
198	2	1	Pirikool Cement R1	1	7	0	1	0	0	0	0	0	2	0	0	0	0	2	0	0	1	2	0	3	1	2	1	0	3	1	100	66.6667	33.3333
199	2	1	Pirikool Cement R1	1	8	0	1	0	0	0	0	0	0	0	0	0	0	0	0	0	1	0	0	1	1	0	1	0	1	1	100	0	100
201	2	1	Pirikool Cement R1	1	1	0	1	0	1	0	0	0	3	0	0	0	0	4	0	0	1	4	0	5	1	4	2	0	5	1	100	80	40
202	2	1	Pirikool Cement R1	1	2	0	3	0	2	0	0	0	4	0	0	0	0	6	0	0	3	6	0	9	3	6	5	0	9	1	100	66.6667	55.5556
203	2	1	Pirikool Cement R1	1	3	0	0	0	0	0	0	0	7	0	0	0	0	7	0	0	0	7	0	7	0	7	0	0	7	1	100	100	0
204	2	1	Pirikool Cement R1	1	4	2	5	0	0	0	0	0	8	0	0	0	0	8	2	0	5	8	2	13	7	8	7	0	15	1	86.6667	53.3333	46.6667
205	2	1	Pirikool Cement R1	1	5	0	2	0	0	0	0	0	0	0	0	0	0	0	0	0	2	0	0	2	2	0	2	0	2	1	100	0	100
206	2	1	Pirikool Cement R1	1	6	0	1	0	4	0	0	0	4	0	0	0	0	8	0	0	1	8	0	9	1	8	5	0	9	1	100	88.8889	55.5556
207	2	1	Pirikool Cement R1	1	7	0	7	0	3	0	0	0	3	0	0	0	0	4	0	0	7	6	0	13	7	6	10	0	13	1	100	46.1538	76.9231
208	2	1	Pirikool Cement R1	1	8	0	1	0	1	0	0	0	0	0	0	0	0	1	0	0	1	1	0	2	1	1	2	0	2	1	100	50	100
209	2	1	Pirikool Cement R1	1	9	0	0	0	0	0	0	0	17	0	0	0	0	17	0	0	0	17	0	17	0	17	0	0	17	1	100	100	0
210	2	1	Pirikool Cement R1	1	1	0	3	0	1	0	0	0	2	0	0	0	0	2	0	0	3	3	0	6	3	3	4	0	6	1	100	50	66.6667
211	2	1	Pirikool Cement R1	1	2	0	5	0	1	0	0	0	6	0	0	0	0	7	0	0	5	7	0	12	5	7	6	0	12	1	100	58.3333	50
212	2	1	Pirikool Cement R1	1	3	0	5	0	0	0	0	0	1	0	0	0	0	1	0	0	5	1	0	6	5	1	5	0	6	1	100	16.6667	83.3333
213	2	1	Pirikool Cement R1	1	4	0	1	0	0	0	0	0	0	0	0	0	0	0	0	0	1	0	0	1	1	0	1	0	1	1	100	0	100
214	2	1	Pirikool Cement R1	1	5	0	2	0	0	0	0	0	0	0	0	0	0	0	0	0	2	0	0	2	2	0	2	0	2	1	100	0	100
215	2	1	Pirikool Cement R1	1	6	0	1	0	0	0	0	0	0	0	0	0	0	0	0	0	1	0	0	1	1	0	1	0	1	1	100	0	100
216	2	1	Pirikool Cement R1	1	7	1	1	0	1	0	0	0	0	0	0	0	0	1	1	0	1	1	1	2	2	1	3	0	3	1	66.6667	33.3333	100
217	2	1	Pirikool Cement R1	1	8	0	1	0	2	0	0	0	0	0	0	0	0	2	0	0	1	2	0	3	1	2	3	0	3	1	100	66.6667	100
218	2	1	Pirikool Cement R1	1	9	0	2	0	1	0	0	0	2	0	0	0	0	3	0	0	2	3	0	5	2	3	3	0	5	1	100	60	60
219	2	1	Pirikool Cement R1	1	1	0	1	0	1	0	0	0	0	0	0	0	0	1	0	0	1	1	0	2	1	1	2	0	2	1	100	50	100
220	2	1	Pirikool Cement R1	1	2	0	1	0	0	0	0	0	0	0	0	0	0	0	0	0	1	0	0	1	1	0	1	0	1	1	100	0	100
221	2	1	Pirikool Cement R1	1	3	1	1	0	0	0	0	0	0	0	0	0	0	0	1	0	1	0	1	1	2	0	2	0	2	1	50	0	100
222	2	1	Pirikool Cement R1	1	4	2	3	0	0	0	0	0	0	0	0	0	0	0	2	0	3	0	2	3	5	0	5	0	5	1	60	0	100
223	2	1	Pirikool Cement R1	1	5	0	2	0	1	0	0	0	0	0	0	0	0	1	0	0	2	1	0	3	2	1	3	0	3	1	100	33.3333	100
224	2	1	Pirikool Cement R1	1	6	1	0	0	0	0	0	0	0	0	0	0	0	0	1	0	0	0	1	0	1	0	1	0	1	1	0	0	100
226	2	1	Pirikool Cement R1	1	8	0	1	0	0	0	0	0	0	0	0	0	0	0	0	0	1	0	0	1	1	0	1	0	1	1	100	0	100
227	2	1	Pirikool Cement R1	1	9	0	2	0	0	0	0	0	0	0	0	0	0	0	0	0	2	0	0	2	2	0	2	0	2	1	100	0	100
228	2	1	Pirikool Cement R1	1	1	0	0	0	0	0	0	0	2	0	0	0	0	2	0	0	0	2	0	2	0	2	0	0	2	1	100	100	0
230	2	1	Pirikool Cement R1	1	3	0	2	0	0	0	0	0	0	0	0	0	0	0	0	0	2	0	0	2	2	0	2	0	2	1	100	0	100
231	2	1	Pirikool Cement R1	1	4	0	0	0	0	0	0	0	2	0	0	0	0	2	0	0	0	2	0	2	0	2	0	0	2	1	100	100	0
232	2	1	Pirikool Cement R1	1	5	1	1	0	0	0	0	0	0	0	0	0	0	0	1	0	1	0	1	1	2	0	2	0	2	1	50	0	100
233	2	1	Pirikool Cement R1	1	6	0	4	0	0	0	0	0	0	0	0	0	0	0	0	0	4	0	0	4	4	0	4	0	4	1	100	0	100
234	2	1	Pirikool Cement R1	1	7	1	1	0	0	0	0	0	0	0	0	0	0	0	1	0	1	0	1	1	2	0	2	0	2	1	50	0	100
235	2	1	Pirikool Cement R1	1	8	0	0	0	1	0	0	0	0	0	0	0	0	1	0	0	0	1	0	1	0	1	1	0	1	1	100	100	100
236	2	1	Pirikool Cement R1	1	9	0	1	0	0	0	0	0	0	0	0	0	0	0	0	0	1	0	0	1	1	0	1	0	1	1	100	0	100
237	2	1	Pirikool Cement R1	1	1	0	1	0	0	0	0	0	0	0	0	0	0	0	0	0	1	0	0	1	1	0	1	0	1	1	100	0	100
238	2	1	Pirikool Cement R1	1	2	0	1	0	0	0	0	0	0	0	0	0	0	0	0	0	1	0	0	1	1	0	1	0	1	1	100	0	100
240	2	1	Pirikool Cement R1	1	4	0	1	0	0	0	0	0	0	0	0	0	0	0	0	0	1	0	0	1	1	0	1	0	1	1	100	0	100
253	2	1	Pirikool Cement R1	1	8	0	0	0	0	0	0	0	1	0	0	0	0	1	0	0	0	1	0	1	0	1	0	0	1	1	100	100	0
254	2	1	Pirikool Cement R1	1	9	0	0	0	0	0	0	0	1	0	0	0	0	1	0	0	0	1	0	1	0	1	0	0	1	1	100	100	0
255	2	1	Pirikool Cement R1	1	1	0	1	0	0	0	0	0	0	0	0	0	0	0	0	0	1	0	0	1	1	0	1	0	1	1	100	0	100
257	2	1	Pirikool Cement R1	1	3	0	1	0	0	0	0	0	0	0	0	0	0	0	0	0	1	0	0	1	1	0	1	0	1	1	100	0	100
262	2	1	Pirikool Cement R1	1	8	0	0	0	1	0	0	0	1	0	0	0	0	2	0	0	0	2	0	2	0	2	1	0	2	1	100	100	50
263	2	1	Pirikool Cement R1	1	9	0	1	0	0	0	0	0	0	0	0	0	0	0	0	0	1	0	0	1	1	0	1	0	1	1	100	0	100
265	2	1	Pirikool Cement R1	1	2	0	1	0	0	0	0	0	1	0	0	0	0	1	0	0	1	1	0	2	1	1	1	0	2	1	100	50	50
267	2	1	Pirikool Cement R1	1	4	0	1	0	0	0	0	0	2	0	0	0	0	2	0	0	1	2	0	3	1	2	1	0	3	1	100	66.6667	33.3333
268	2	1	Pirikool Cement R1	1	5	0	1	0	0	0	0	0	0	0	0	0	0	0	0	0	1	0	0	1	1	0	1	0	1	1	100	0	100
270	2	1	Pirikool Cement R1	1	7	0	0	0	1	0	0	0	0	0	0	0	0	0	0	0	0	1	0	1	0	1	1	0	1	1	100	100	100
271	2	1	Pirikool Cement R1	1	8	0	1	0	0	0	0	0	1	0	0	0	0	1	0	0	1	1	0	2	1	1	1	0	2	1	100	50	50
272	2	1	Pirikool Cement R1	1	9	0	0	0	1	0	0	0	0	0	0	0	0	1	0	0	0	1	0	1	0	1	1	0	1	1	100	100	100
273	2	1	Pirikool Cement R1	1	1	0	2	0	0	0	0	0	0	0	0	0	0	0	0	0	2	0	0	2	2	0	2	0	2	1	100	0	100
274	2	1	Pirikool Cement R1	1	2	0	1	0	1	0	0	0	0	0	0	0	0	1	0	0	1	1	0	2	1	1	2	0	2	1	100	50	100
275	2	1	Pirikool Cement R1	1	3	0	1	0	0	0	0	0	0	0	0	0	0	0	0	0	1	0	0	1	1	0	1	0	1	1	100	0	100
276	2	1	Pirikool Cement R1	1	4	0	0	0	1	0	0	0	0	0	0	0	0	1	0	0	0	1	0	1	0	1	1	0	1	1	100	100	100
277	2	1	Pirikool Cement R1	1	5	1	1	0	1	0	0	0	5	0	0	0	0	5	1	0	1	6	1	7	2	6	3	0	8	1	87.5	75	37.5
278	2	1	Pirikool Cement R1	1	6	0	3	0	3	0	0	0	1	0	0	0	0	4	0	0	3	4	0	7	3	4	6	0	7	1	100	57.1429	85.7143
279	2	1	Pirikool Cement R1	1	7	0	2	0	0	0	0	0	0	0	0	0	0	0	0	0	2	0	0	2	2	0	2	0	2	1	100	0	100
280	2	1	Pirikool Cement R1	1	8	0	1	0	0	0	0	0	0	0	0	0	0	0	0	0	1	0	0	1	1	0	1	0	1	1	100	0	100
282	2	1	Pirikool Cement R1	1	1	0	2	0	0	0	0	0	0	0	0	0	0	0	0	0	2	0	0	2	2	0	2	0	2	1	100	0	100
283	2	1	Pirikool Cement R1	1	2	0	2	0	1	0	0	0	0	0	0	0	0	0	0	0	2	1	0	3	2	1	3	0	3	1	100	33.3333	100
284	2	1	Pirikool Cement R1	1	3	0	1	0	0	0	0	0	0	0	0	0	0	0	0	0	1	0	0	1	1	0	1	0	1	1	100	0	100
286	2	1	Pirikool Cement R1	1	5	0	2	0	1	0	0	0	0	0	0	0	0	0	0	0	2	1	0	3	2	1	3	0	3	1	100	33.3333	100
287	2	1	Pirikool Cement R1	1	6	0	3	0	1	0	0	0	0	0	0	0	0	0	0	0	3	1	0	4	3	1	4	0	4	1	100	25	100
288	2	1	Pirikool Cement R1	1	7	0	1	0	0	0	0	0	0	0	0	0	0	0	0	0	1	0	0	1	1	0	1	0	1	1	100	0	100
2	3	2	Actellic Cement R1	2	4	0	0	0	0	0	0	0	1	0	0	0	0	1	0	0	0	1	0	1	0	1	0	0	1	1	100	100	0
3	3	2	Actellic Cement R1	2	5	0	0	0	2	0	0	0	0	0	0	0	0	2	0	0	0	2	0	2	0	2	2	0	2	1	100	100	100
4	3	2	Actellic Cement R1	2	6	0	0	0	1	0	0	0	0	0	0	0	0	0	0	0	0	1	0	1	0	1	1	0	1	1	100	100	100
5	3	2	Actellic Cement R1	2	7	0	0	0	1	0	0	0	0	0	0	0	0	1	0	0	0	1	0	1	0	1	1	0	1	1	100	100	100
6	3	2	Actellic Cement R1	2	8	0	0	1	1	0	0	0	0	0	0	0	0	2	0	1	0	1	1	1	0	2	2	0	2	1	50	100	100
7	3	2	Actellic Cement R1	2	9	0	0	0	0	0	0	0	1	0	0	0	0	1	0	0	0	1	0	1	0	1	0	0	1	1	100	100	0
9	3	2	Actellic Cement R1	2	2	0	0	0	2	0	0	0	5	0	0	0	0	6	0	0	0	7	0	7	0	7	2	0	7	1	100	100	28.5714
10	3	2	Actellic Cement R1	2	3	0	1	0	1	0	0	0	1	0	0	0	0	1	0	0	1	2	0	3	1	2	2	0	3	1	100	66.6667	66.6667
11	3	2	Actellic Cement R1	2	4	0	0	1	3	0	0	0	0	0	0	0	0	2	0	1	0	3	1	3	0	4	4	0	4	1	75	100	100
12	3	2	Actellic Cement R1	2	5	0	0	0	4	0	0	0	1	0	0	0	0	4	0	0	0	5	0	5	0	5	4	0	5	1	100	100	80
13	3	2	Actellic Cement R1	2	6	0	0	0	2	0	0	0	2	0	0	0	0	2	0	0	0	4	0	4	0	4	2	0	4	1	100	100	50
14	3	2	Actellic Cement R1	2	7	0	1	0	3	0	0	0	0	0	0	0	0	2	0	0	1	3	0	4	1	3	4	0	4	1	100	75	100
15	3	2	Actellic Cement R1	2	8	0	0	0	5	0	0	0	3	0	0	0	0	5	0	0	0	8	0	8	0	8	5	0	8	1	100	100	62.5
16	3	2	Actellic Cement R1	2	9	0	0	0	0	0	0	0	1	0	0	0	0	1	0	0	0	1	0	1	0	1	0	0	1	1	100	100	0
17	3	2	Actellic Cement R1	2	1	0	1	0	2	0	0	0	3	0	0	0	0	3	0	0	1	5	0	6	1	5	3	0	6	1	100	83.3333	50
18	3	2	Actellic Cement R1	2	2	0	0	0	3	0	0	0	2	0	0	0	0	4	0	0	0	5	0	5	0	5	3	0	5	1	100	100	60
19	3	2	Actellic Cement R1	2	3	0	0	0	5	0	0	0	4	0	0	0	0	9	0	0	0	9	0	9	0	9	5	0	9	1	100	100	55.5556
20	3	2	Actellic Cement R1	2	4	0	2	0	1	0	0	0	0	0	0	0	0	1	0	0	2	1	0	3	2	1	3	0	3	1	100	33.3333	100
21	3	2	Actellic Cement R1	2	5	0	2	0	10	0	0	0	4	0	0	0	0	12	0	0	2	14	0	16	2	14	12	0	16	1	100	87.5	75
22	3	2	Actellic Cement R1	2	6	0	0	0	2	0	0	1	7	0	0	0	0	8	0	1	0	9	1	9	0	10	2	0	10	1	90	100	20
23	3	2	Actellic Cement R1	2	7	0	0	0	1	0	0	0	3	0	0	0	0	4	0	0	0	4	0	4	0	4	1	0	4	1	100	100	25
24	3	2	Actellic Cement R1	2	8	0	0	1	6	0	0	0	2	0	0	0	0	6	0	1	0	8	1	8	0	9	7	0	9	1	88.8889	100	77.7778
25	3	2	Actellic Cement R1	2	9	0	1	1	2	0	0	0	0	0	0	0	0	2	0	1	1	2	1	3	1	3	4	0	4	1	75	75	100
26	3	2	Actellic Cement R1	2	1	0	1	0	3	0	0	0	2	0	0	0	0	4	0	0	1	5	0	6	1	5	4	0	6	1	100	83.3333	66.6667
27	3	2	Actellic Cement R1	2	2	0	0	0	6	0	0	0	5	0	0	0	0	11	0	0	0	11	0	11	0	11	6	0	11	1	100	100	54.5455
28	3	2	Actellic Cement R1	2	3	0	0	0	7	0	0	0	0	0	0	0	0	7	0	0	0	7	0	7	0	7	7	0	7	1	100	100	100
29	3	2	Actellic Cement R1	2	4	0	0	0	9	0	0	0	4	0	0	0	0	11	0	0	0	13	0	13	0	13	9	0	13	1	100	100	69.2308
30	3	2	Actellic Cement R1	2	5	0	0	0	7	0	0	0	10	0	0	0	0	17	0	0	0	17	0	17	0	17	7	0	17	1	100	100	41.1765
31	3	2	Actellic Cement R1	2	6	1	0	0	1	0	0	0	0	0	0	0	0	1	1	0	0	1	1	1	1	1	2	0	2	1	50	50	100
32	3	2	Actellic Cement R1	2	7	1	1	0	8	0	0	0	3	0	0	0	0	11	1	0	1	11	1	12	2	11	10	0	13	1	92.3077	84.6154	76.9231
33	3	2	Actellic Cement R1	2	8	0	0	0	8	0	0	0	0	0	0	0	0	8	0	0	0	8	0	8	0	8	8	0	8	1	100	100	100
34	3	2	Actellic Cement R1	2	9	0	2	0	6	0	0	0	3	0	0	0	0	3	0	0	2	9	0	11	2	9	8	0	11	1	100	81.8182	72.7273
35	3	2	Actellic Cement R1	2	1	0	0	1	3	0	0	0	0	0	0	0	0	3	0	1	0	3	1	3	0	4	4	0	4	1	75	100	100
36	3	2	Actellic Cement R1	2	2	0	0	0	2	0	0	0	4	0	0	0	0	6	0	0	0	6	0	6	0	6	2	0	6	1	100	100	33.3333
37	3	2	Actellic Cement R1	2	3	1	1	0	2	0	0	0	0	0	0	0	0	0	1	0	1	2	1	3	2	2	4	0	4	1	75	50	100
38	3	2	Actellic Cement R1	2	4	0	0	0	1	0	0	0	0	0	0	0	0	1	0	0	0	1	0	1	0	1	1	0	1	1	100	100	100
39	3	2	Actellic Cement R1	2	5	0	0	0	4	0	0	0	2	0	0	0	0	5	0	0	0	6	0	6	0	6	4	0	6	1	100	100	66.6667
40	3	2	Actellic Cement R1	2	6	0	0	0	3	0	0	0	4	0	0	0	0	5	0	0	0	7	0	7	0	7	3	0	7	1	100	100	42.8571
41	3	2	Actellic Cement R1	2	7	0	0	0	5	0	0	0	4	0	0	0	0	9	0	0	0	9	0	9	0	9	5	0	9	1	100	100	55.5556
42	3	2	Actellic Cement R1	2	8	0	1	0	5	0	0	0	0	0	0	0	0	5	0	0	1	5	0	6	1	5	6	0	6	1	100	83.3333	100
43	3	2	Actellic Cement R1	2	9	0	2	0	5	0	0	0	0	0	0	0	0	2	0	0	2	5	0	7	2	5	7	0	7	1	100	71.4286	100
44	3	2	Actellic Cement R1	2	1	0	1	0	13	0	0	0	7	0	0	0	0	16	0	0	1	20	0	21	1	20	14	0	21	1	100	95.2381	66.6667
45	3	2	Actellic Cement R1	2	2	0	1	0	16	0	0	0	14	0	0	0	0	25	0	0	1	30	0	31	1	30	17	0	31	1	100	96.7742	54.8387
46	3	2	Actellic Cement R1	2	3	0	1	0	1	0	0	0	7	0	0	0	0	8	0	0	1	8	0	9	1	8	2	0	9	1	100	88.8889	22.2222
47	3	2	Actellic Cement R1	2	4	0	2	1	7	0	0	0	10	0	0	0	0	17	0	1	2	17	1	19	2	18	10	0	20	1	95	90	50
48	3	2	Actellic Cement R1	2	5	0	8	0	3	0	0	0	7	0	0	0	0	10	0	0	8	10	0	18	8	10	11	0	18	1	100	55.5556	61.1111
49	3	2	Actellic Cement R1	2	6	0	1	0	2	0	0	0	4	0	0	0	0	4	0	0	1	6	0	7	1	6	3	0	7	1	100	85.7143	42.8571
50	3	2	Actellic Cement R1	2	7	4	4	3	5	0	0	1	10	0	0	0	0	16	4	4	4	15	8	19	8	19	16	0	27	1	70.3704	70.3704	59.2593
51	3	2	Actellic Cement R1	2	8	0	7	0	13	0	0	0	3	0	0	0	0	15	0	0	7	16	0	23	7	16	20	0	23	1	100	69.5652	86.9565
52	3	2	Actellic Cement R1	2	9	0	11	0	9	0	0	3	5	0	0	0	0	9	0	3	11	14	3	25	11	17	20	0	28	1	89.2857	60.7143	71.4286
53	3	2	Actellic Cement R1	2	1	3	12	2	8	0	0	0	0	0	0	0	0	9	3	2	12	8	5	20	15	10	25	0	25	1	80	40	100
54	3	2	Actellic Cement R1	2	2	0	16	2	34	0	0	0	5	0	0	0	0	28	0	2	16	39	2	55	16	41	52	0	57	1	96.4912	71.9298	91.2281
67	3	2	Actellic Cement R1	2	3	0	2	0	11	0	0	0	2	0	0	0	0	6	0	0	2	13	0	15	2	13	13	0	15	1	100	86.6667	86.6667
68	3	2	Actellic Cement R1	2	4	0	0	0	3	0	0	0	1	0	0	0	0	4	0	0	0	4	0	4	0	4	3	0	4	1	100	100	75
69	3	2	Actellic Cement R1	2	5	1	2	0	11	0	0	2	9	0	0	0	0	17	1	2	2	20	3	22	3	22	14	0	25	1	88	88	56
70	3	2	Actellic Cement R1	2	6	0	1	0	1	0	0	0	14	0	0	0	0	15	0	0	1	15	0	16	1	15	2	0	16	1	100	93.75	12.5
71	3	2	Actellic Cement R1	2	7	0	4	0	6	0	0	0	13	0	0	0	0	17	0	0	4	19	0	23	4	19	10	0	23	1	100	82.6087	43.4783
72	3	2	Actellic Cement R1	2	8	0	1	3	39	0	0	0	1	0	0	0	0	40	0	3	1	40	3	41	1	43	43	0	44	1	93.1818	97.7273	97.7273
73	3	2	Actellic Cement R1	2	9	0	0	0	10	0	0	0	8	0	0	0	0	13	0	0	0	18	0	18	0	18	10	0	18	1	100	100	55.5556
74	3	2	Actellic Cement R1	2	1	0	5	0	0	0	0	0	2	0	0	0	0	2	0	0	5	2	0	7	5	2	5	0	7	1	100	28.5714	71.4286
75	3	2	Actellic Cement R1	2	2	2	2	0	2	0	0	0	1	0	0	0	0	3	2	0	2	3	2	5	4	3	6	0	7	1	71.4286	42.8571	85.7143
76	3	2	Actellic Cement R1	2	3	0	2	0	7	0	0	0	0	0	0	0	0	1	0	0	2	7	0	9	2	7	9	0	9	1	100	77.7778	100
77	3	2	Actellic Cement R1	2	4	1	18	0	10	0	0	0	7	0	0	0	0	15	1	0	18	17	1	35	19	17	29	0	36	1	97.2222	47.2222	80.5556
78	3	2	Actellic Cement R1	2	5	4	2	0	0	0	0	0	0	0	0	0	0	0	4	0	2	0	4	2	6	0	6	0	6	1	33.3333	0	100
79	3	2	Actellic Cement R1	2	6	0	7	0	2	0	0	0	0	0	0	0	0	0	0	0	7	2	0	9	7	2	9	0	9	1	100	22.2222	100
80	3	2	Actellic Cement R1	2	7	0	8	0	8	0	0	0	1	0	0	0	0	4	0	0	8	9	0	17	8	9	16	0	17	1	100	52.9412	94.1176
81	3	2	Actellic Cement R1	2	8	0	1	0	3	0	0	0	2	0	0	0	0	4	0	0	1	5	0	6	1	5	4	0	6	1	100	83.3333	66.6667
82	3	2	Actellic Cement R1	2	9	0	4	0	0	0	0	0	1	0	0	0	0	1	0	0	4	1	0	5	4	1	4	0	5	1	100	20	80
83	3	2	Actellic Cement R1	2	1	0	5	0	0	0	0	0	0	0	0	0	0	0	0	0	5	0	0	5	5	0	5	0	5	1	100	0	100
84	3	2	Actellic Cement R1	2	2	0	3	0	3	0	0	0	4	0	0	0	0	4	0	0	3	7	0	10	3	7	6	0	10	1	100	70	60
85	3	2	Actellic Cement R1	2	3	1	0	0	0	0	0	0	0	0	0	0	0	0	1	0	0	0	1	0	1	0	1	0	1	1	0	0	100
86	3	2	Actellic Cement R1	2	4	0	5	0	0	0	0	0	3	0	0	0	0	3	0	0	5	3	0	8	5	3	5	0	8	1	100	37.5	62.5
87	3	2	Actellic Cement R1	2	5	0	3	0	0	0	0	0	0	0	0	0	0	0	0	0	3	0	0	3	3	0	3	0	3	1	100	0	100
88	3	2	Actellic Cement R1	2	6	0	0	1	2	0	0	0	1	0	0	0	0	3	0	1	0	3	1	3	0	4	3	0	4	1	75	100	75
89	3	2	Actellic Cement R1	2	7	0	6	0	5	0	0	0	2	0	0	0	0	4	0	0	6	7	0	13	6	7	11	0	13	1	100	53.8462	84.6154
90	3	2	Actellic Cement R1	2	8	0	1	1	1	0	0	0	0	0	0	0	0	1	0	1	1	1	1	2	1	2	3	0	3	1	66.6667	66.6667	100
91	3	2	Actellic Cement R1	2	9	1	3	0	0	0	0	1	1	0	0	0	0	2	1	1	3	1	2	4	4	2	4	0	6	1	66.6667	33.3333	66.6667
92	3	2	Actellic Cement R1	2	1	0	2	0	2	0	0	0	4	0	0	0	0	5	0	0	2	6	0	8	2	6	4	0	8	1	100	75	50
93	3	2	Actellic Cement R1	2	2	0	6	0	4	0	0	0	2	0	0	0	0	4	0	0	6	6	0	12	6	6	10	0	12	1	100	50	83.3333
94	3	2	Actellic Cement R1	2	3	0	3	0	2	0	0	0	2	0	0	0	0	2	0	0	3	4	0	7	3	4	5	0	7	1	100	57.1429	71.4286
95	3	2	Actellic Cement R1	2	4	0	8	1	3	0	0	0	3	0	0	0	0	4	0	1	8	6	1	14	8	7	12	0	15	1	93.3333	46.6667	80
96	3	2	Actellic Cement R1	2	5	0	2	0	1	0	0	0	0	0	0	0	0	0	0	0	2	1	0	3	2	1	3	0	3	1	100	33.3333	100
97	3	2	Actellic Cement R1	2	6	0	8	0	6	0	0	0	1	0	0	0	0	6	0	0	8	7	0	15	8	7	14	0	15	1	100	46.6667	93.3333
98	3	2	Actellic Cement R1	2	7	0	6	0	3	0	0	0	0	0	0	0	0	0	0	0	6	3	0	9	6	3	9	0	9	1	100	33.3333	100
99	3	2	Actellic Cement R1	2	8	0	0	0	10	0	0	0	3	0	0	0	0	11	0	0	0	13	0	13	0	13	10	0	13	1	100	100	76.9231
100	3	2	Actellic Cement R1	2	9	0	5	0	7	0	0	0	5	0	0	0	0	9	0	0	5	12	0	17	5	12	12	0	17	1	100	70.5882	70.5882
101	3	2	Actellic Cement R1	2	1	0	3	0	1	0	0	0	4	0	0	0	0	4	0	0	3	5	0	8	3	5	4	0	8	1	100	62.5	50
102	3	2	Actellic Cement R1	2	2	0	7	0	3	0	0	0	6	0	0	0	0	7	0	0	7	9	0	16	7	9	10	0	16	1	100	56.25	62.5
103	3	2	Actellic Cement R1	2	3	0	0	0	1	0	0	0	0	0	0	0	0	0	0	0	0	1	0	1	0	1	1	0	1	1	100	100	100
104	3	2	Actellic Cement R1	2	4	0	5	0	4	0	0	0	11	0	0	0	0	14	0	0	5	15	0	20	5	15	9	0	20	1	100	75	45
105	3	2	Actellic Cement R1	2	5	1	7	0	3	0	0	0	5	0	0	0	0	8	1	0	7	8	1	15	8	8	11	0	16	1	93.75	50	68.75
106	3	2	Actellic Cement R1	2	6	0	8	0	0	0	0	0	1	0	0	0	0	1	0	0	8	1	0	9	8	1	8	0	9	1	100	11.1111	88.8889
107	3	2	Actellic Cement R1	2	7	0	4	0	2	0	0	0	2	0	0	0	0	4	0	0	4	4	0	8	4	4	6	0	8	1	100	50	75
108	3	2	Actellic Cement R1	2	8	0	0	0	15	0	0	0	3	0	0	0	0	17	0	0	0	18	0	18	0	18	15	0	18	1	100	100	83.3333
109	3	2	Actellic Cement R1	2	9	0	2	0	6	0	0	0	2	0	0	0	0	4	0	0	2	8	0	10	2	8	8	0	10	1	100	80	80
110	3	2	Actellic Cement R1	2	1	0	6	0	0	0	0	0	1	0	0	0	0	1	0	0	6	1	0	7	6	1	6	0	7	1	100	14.2857	85.7143
111	3	2	Actellic Cement R1	2	2	0	5	0	2	0	0	0	2	0	0	0	0	2	0	0	5	4	0	9	5	4	7	0	9	1	100	44.4444	77.7778
112	3	2	Actellic Cement R1	2	3	0	2	0	2	0	0	0	5	0	0	0	0	5	0	0	2	7	0	9	2	7	4	0	9	1	100	77.7778	44.4444
113	3	2	Actellic Cement R1	2	4	1	11	0	0	0	0	0	0	0	0	0	0	0	1	0	11	0	1	11	12	0	12	0	12	1	91.6667	0	100
114	3	2	Actellic Cement R1	2	5	0	2	0	0	0	0	0	0	0	0	0	0	0	0	0	2	0	0	2	2	0	2	0	2	1	100	0	100
115	3	2	Actellic Cement R1	2	6	0	6	0	1	0	0	0	2	0	0	0	0	3	0	0	6	3	0	9	6	3	7	0	9	1	100	33.3333	77.7778
116	3	2	Actellic Cement R1	2	7	0	0	0	0	0	0	0	2	0	0	0	0	2	0	0	0	2	0	2	0	2	0	0	2	1	100	100	0
117	3	2	Actellic Cement R1	2	8	0	0	0	2	0	0	0	0	0	0	0	0	0	0	0	0	2	0	2	0	2	2	0	2	1	100	100	100
118	3	2	Actellic Cement R1	2	9	0	1	0	3	0	0	0	2	0	0	0	0	4	0	0	1	5	0	6	1	5	4	0	6	1	100	83.3333	66.6667
119	3	2	Actellic Cement R1	2	1	0	7	0	2	0	0	0	4	0	0	0	0	6	0	0	7	6	0	13	7	6	9	0	13	1	100	46.1538	69.2308
120	3	2	Actellic Cement R1	2	2	0	6	0	3	0	0	0	7	0	0	0	0	10	0	0	6	10	0	16	6	10	9	0	16	1	100	62.5	56.25
121	3	2	Actellic Cement R1	2	3	0	2	0	3	0	0	0	0	0	0	0	0	3	0	0	2	3	0	5	2	3	5	0	5	1	100	60	100
122	3	2	Actellic Cement R1	2	4	0	7	0	5	0	0	0	8	0	0	0	0	11	0	0	7	13	0	20	7	13	12	0	20	1	100	65	60
123	3	2	Actellic Cement R1	2	5	0	2	0	2	0	0	0	0	0	0	0	0	2	0	0	2	2	0	4	2	2	4	0	4	1	100	50	100
124	3	2	Actellic Cement R1	2	6	0	4	0	0	0	0	0	2	0	0	0	0	2	0	0	4	2	0	6	4	2	4	0	6	1	100	33.3333	66.6667
125	3	2	Actellic Cement R1	2	7	0	2	0	0	0	0	0	2	0	0	0	0	2	0	0	2	2	0	4	2	2	2	0	4	1	100	50	50
126	3	2	Actellic Cement R1	2	8	0	2	0	0	0	0	0	0	0	0	0	0	0	0	0	2	0	0	2	2	0	2	0	2	1	100	0	100
127	3	2	Actellic Cement R1	2	9	0	2	0	0	0	0	0	0	0	0	0	0	0	0	0	2	0	0	2	2	0	2	0	2	1	100	0	100
128	3	2	Actellic Cement R1	2	1	0	2	0	5	0	0	0	5	0	0	0	0	7	0	0	2	10	0	12	2	10	7	0	12	1	100	83.3333	58.3333
129	3	2	Actellic Cement R1	2	2	0	7	0	1	0	0	0	0	0	0	0	0	1	0	0	7	1	0	8	7	1	8	0	8	1	100	12.5	100
130	3	2	Actellic Cement R1	2	3	0	6	0	3	0	0	0	2	0	0	0	0	3	0	0	6	5	0	11	6	5	9	0	11	1	100	45.4545	81.8182
131	3	2	Actellic Cement R1	2	4	0	12	0	7	0	0	0	5	0	0	0	0	11	0	0	12	12	0	24	12	12	19	0	24	1	100	50	79.1667
132	3	2	Actellic Cement R1	2	5	0	11	0	5	0	0	0	0	0	0	0	0	4	0	0	11	5	0	16	11	5	16	0	16	1	100	31.25	100
133	3	2	Actellic Cement R1	2	6	0	13	0	4	0	0	0	1	0	0	0	0	4	0	0	13	5	0	18	13	5	17	0	18	1	100	27.7778	94.4444
134	3	2	Actellic Cement R1	2	7	0	4	0	4	0	0	0	8	0	0	0	0	9	0	0	4	12	0	16	4	12	8	0	16	1	100	75	50
135	3	2	Actellic Cement R1	2	8	0	2	0	3	0	0	0	1	0	0	0	0	3	0	0	2	4	0	6	2	4	5	0	6	1	100	66.6667	83.3333
136	3	2	Actellic Cement R1	2	9	0	11	0	2	0	0	0	1	0	0	0	0	2	0	0	11	3	0	14	11	3	13	0	14	1	100	21.4286	92.8571
137	3	2	Actellic Cement R1	2	1	0	4	0	1	0	0	0	4	0	0	0	0	5	0	0	4	5	0	9	4	5	5	0	9	1	100	55.5556	55.5556
138	3	2	Actellic Cement R1	2	2	0	13	0	1	0	0	0	4	0	0	0	0	5	0	0	13	5	0	18	13	5	14	0	18	1	100	27.7778	77.7778
139	3	2	Actellic Cement R1	2	3	0	14	0	7	0	0	0	4	0	0	0	0	8	0	0	14	11	0	25	14	11	21	0	25	1	100	44	84
140	3	2	Actellic Cement R1	2	4	0	12	0	1	0	0	0	4	0	0	0	0	4	0	0	12	5	0	17	12	5	13	0	17	1	100	29.4118	76.4706
141	3	2	Actellic Cement R1	2	5	0	6	0	0	0	0	0	2	0	0	0	0	2	0	0	6	2	0	8	6	2	6	0	8	1	100	25	75
142	3	2	Actellic Cement R1	2	6	0	2	0	1	0	0	0	4	0	0	0	0	5	0	0	2	5	0	7	2	5	3	0	7	1	100	71.4286	42.8571
143	3	2	Actellic Cement R1	2	7	0	1	0	0	0	0	0	0	0	0	0	0	0	0	0	1	0	0	1	1	0	1	0	1	1	100	0	100
144	3	2	Actellic Cement R1	2	8	0	2	0	4	0	0	0	2	0	0	0	0	5	0	0	2	6	0	8	2	6	6	0	8	1	100	75	75
145	3	2	Actellic Cement R1	2	9	0	2	0	0	0	0	0	0	0	0	0	0	0	0	0	2	0	0	2	2	0	2	0	2	1	100	0	100
146	3	2	Actellic Cement R1	2	1	0	6	0	0	0	0	0	0	0	0	0	0	0	0	0	6	0	0	6	6	0	6	0	6	1	100	0	100
147	3	2	Actellic Cement R1	2	2	1	5	0	0	0	0	0	6	0	0	0	0	6	1	0	5	6	1	11	6	6	6	0	12	1	91.6667	50	50
148	3	2	Actellic Cement R1	2	3	0	1	0	8	0	0	0	6	0	0	0	0	12	0	0	1	14	0	15	1	14	9	0	15	1	100	93.3333	60
149	3	2	Actellic Cement R1	2	4	0	13	0	0	0	0	0	15	0	0	0	0	15	0	0	13	15	0	28	13	15	13	0	28	1	100	53.5714	46.4286
150	3	2	Actellic Cement R1	2	5	0	5	0	0	0	0	0	0	0	0	0	0	0	0	0	5	0	0	5	5	0	5	0	5	1	100	0	100
151	3	2	Actellic Cement R1	2	6	0	7	0	0	0	0	0	0	0	0	0	0	0	0	0	7	0	0	7	7	0	7	0	7	1	100	0	100
152	3	2	Actellic Cement R1	2	7	0	4	0	1	0	0	0	9	0	0	0	0	10	0	0	4	10	0	14	4	10	5	0	14	1	100	71.4286	35.7143
153	3	2	Actellic Cement R1	2	8	0	2	0	2	0	0	0	1	0	0	0	0	2	0	0	2	3	0	5	2	3	4	0	5	1	100	60	80
154	3	2	Actellic Cement R1	2	9	0	3	0	1	0	0	0	0	0	0	0	0	0	0	0	3	1	0	4	3	1	4	0	4	1	100	25	100
155	3	2	Actellic Cement R1	2	1	0	4	0	0	0	0	0	4	0	0	0	0	4	0	0	4	4	0	8	4	4	4	0	8	1	100	50	50
156	3	2	Actellic Cement R1	2	2	0	9	0	1	0	0	0	5	0	0	0	0	6	0	0	9	6	0	15	9	6	10	0	15	1	100	40	66.6667
157	3	2	Actellic Cement R1	2	3	0	10	0	8	0	0	0	0	0	0	0	0	1	0	0	10	8	0	18	10	8	18	0	18	1	100	44.4444	100
158	3	2	Actellic Cement R1	2	4	0	15	0	1	0	0	0	17	0	0	0	0	18	0	0	15	18	0	33	15	18	16	0	33	1	100	54.5455	48.4848
159	3	2	Actellic Cement R1	2	5	0	6	0	1	0	0	0	0	0	0	0	0	1	0	0	6	1	0	7	6	1	7	0	7	1	100	14.2857	100
160	3	2	Actellic Cement R1	2	6	0	20	0	3	0	0	0	2	0	0	0	0	4	0	0	20	5	0	25	20	5	23	0	25	1	100	20	92
161	3	2	Actellic Cement R1	2	7	0	17	0	0	0	0	0	5	0	0	0	0	5	0	0	17	5	0	22	17	5	17	0	22	1	100	22.7273	77.2727
162	3	2	Actellic Cement R1	2	8	0	4	0	3	0	0	0	1	0	0	0	0	4	0	0	4	4	0	8	4	4	7	0	8	1	100	50	87.5
163	3	2	Actellic Cement R1	2	9	0	1	0	0	0	0	0	3	0	0	0	0	3	0	0	1	3	0	4	1	3	1	0	4	1	100	75	25
164	3	2	Actellic Cement R1	2	1	0	6	0	2	0	0	0	2	0	0	0	0	4	0	0	6	4	0	10	6	4	8	0	10	1	100	40	80
165	3	2	Actellic Cement R1	2	2	0	9	0	1	0	0	0	0	0	0	0	0	0	0	0	9	1	0	10	9	1	10	0	10	1	100	10	100
166	3	2	Actellic Cement R1	2	3	0	13	0	2	0	0	0	8	0	0	0	0	10	0	0	13	10	0	23	13	10	15	0	23	1	100	43.4783	65.2174
167	3	2	Actellic Cement R1	2	4	0	20	0	4	0	0	0	3	0	0	0	0	6	0	0	20	7	0	27	20	7	24	0	27	1	100	25.9259	88.8889
168	3	2	Actellic Cement R1	2	5	0	13	0	1	0	0	0	0	0	0	0	0	1	0	0	13	1	0	14	13	1	14	0	14	1	100	7.14286	100
169	3	2	Actellic Cement R1	2	6	0	21	0	1	0	0	0	2	0	0	0	0	3	0	0	21	3	0	24	21	3	22	0	24	1	100	12.5	91.6667
170	3	2	Actellic Cement R1	2	7	0	12	0	3	0	0	0	3	0	0	0	0	6	0	0	12	6	0	18	12	6	15	0	18	1	100	33.3333	83.3333
171	3	2	Actellic Cement R1	2	8	0	3	0	0	0	0	0	0	0	0	0	0	0	0	0	3	0	0	3	3	0	3	0	3	1	100	0	100
172	3	2	Actellic Cement R1	2	9	0	7	0	1	0	0	0	8	0	0	0	0	9	0	0	7	9	0	16	7	9	8	0	16	1	100	56.25	50
173	3	2	Actellic Cement R1	2	1	0	7	0	3	0	0	0	8	0	0	0	0	11	0	0	7	11	0	18	7	11	10	0	18	1	100	61.1111	55.5556
174	3	2	Actellic Cement R1	2	2	0	21	0	8	0	0	0	5	0	0	0	0	13	0	0	21	13	0	34	21	13	29	0	34	1	100	38.2353	85.2941
175	3	2	Actellic Cement R1	2	3	0	5	0	2	0	0	0	0	0	0	0	0	1	0	0	5	2	0	7	5	2	7	0	7	1	100	28.5714	100
176	3	2	Actellic Cement R1	2	4	0	36	0	6	0	0	0	0	0	0	0	0	6	0	0	36	6	0	42	36	6	42	0	42	1	100	14.2857	100
177	3	2	Actellic Cement R1	2	5	0	19	0	2	0	0	0	0	0	0	0	0	2	0	0	19	2	0	21	19	2	21	0	21	1	100	9.52381	100
178	3	2	Actellic Cement R1	2	6	0	22	0	6	0	0	0	3	0	0	0	0	9	0	0	22	9	0	31	22	9	28	0	31	1	100	29.0323	90.3226
179	3	2	Actellic Cement R1	2	7	0	10	0	2	0	0	0	3	0	0	0	0	4	0	0	10	5	0	15	10	5	12	0	15	1	100	33.3333	80
180	3	2	Actellic Cement R1	2	8	0	5	0	2	0	0	0	0	0	0	0	0	0	0	0	5	2	0	7	5	2	7	0	7	1	100	28.5714	100
181	3	2	Actellic Cement R1	2	9	0	5	0	0	0	0	0	0	0	0	0	0	0	0	0	5	0	0	5	5	0	5	0	5	1	100	0	100
182	3	2	Actellic Cement R1	2	1	0	3	0	1	0	0	0	0	0	0	0	0	1	0	0	3	1	0	4	3	1	4	0	4	1	100	25	100
183	3	2	Actellic Cement R1	2	2	0	10	0	2	0	0	0	0	0	0	0	0	1	0	0	10	2	0	12	10	2	12	0	12	1	100	16.6667	100
184	3	2	Actellic Cement R1	2	3	0	6	0	2	0	0	0	7	0	0	0	0	8	0	0	6	9	0	15	6	9	8	0	15	1	100	60	53.3333
185	3	2	Actellic Cement R1	2	4	0	5	0	0	0	0	0	3	0	0	0	0	3	0	0	5	3	0	8	5	3	5	0	8	1	100	37.5	62.5
186	3	2	Actellic Cement R1	2	5	0	5	0	3	0	0	0	0	0	0	0	0	3	0	0	5	3	0	8	5	3	8	0	8	1	100	37.5	100
187	3	2	Actellic Cement R1	2	6	0	8	0	0	0	0	0	0	0	0	0	0	0	0	0	8	0	0	8	8	0	8	0	8	1	100	0	100
188	3	2	Actellic Cement R1	2	7	0	24	0	0	0	0	0	5	0	0	0	0	5	0	0	24	5	0	29	24	5	24	0	29	1	100	17.2414	82.7586
189	3	2	Actellic Cement R1	2	8	0	9	0	0	0	0	0	0	0	0	0	0	0	0	0	9	0	0	9	9	0	9	0	9	1	100	0	100
190	3	2	Actellic Cement R1	2	9	0	4	0	0	0	0	0	2	0	0	0	0	2	0	0	4	2	0	6	4	2	4	0	6	1	100	33.3333	66.6667
191	3	2	Actellic Cement R1	2	1	0	6	0	0	0	0	0	0	0	0	0	0	0	0	0	6	0	0	6	6	0	6	0	6	1	100	0	100
192	3	2	Actellic Cement R1	2	2	0	4	0	4	0	0	0	6	0	0	0	0	9	0	0	4	10	0	14	4	10	8	0	14	1	100	71.4286	57.1429
193	3	2	Actellic Cement R1	2	3	0	2	0	5	0	0	0	2	0	0	0	0	6	0	0	2	7	0	9	2	7	7	0	9	1	100	77.7778	77.7778
194	3	2	Actellic Cement R1	2	4	0	2	0	1	0	0	0	4	0	0	0	0	5	0	0	2	5	0	7	2	5	3	0	7	1	100	71.4286	42.8571
195	3	2	Actellic Cement R1	2	5	0	2	0	0	0	0	0	0	0	0	0	0	0	0	0	2	0	0	2	2	0	2	0	2	1	100	0	100
196	3	2	Actellic Cement R1	2	6	0	4	0	0	0	0	0	0	0	0	0	0	0	0	0	4	0	0	4	4	0	4	0	4	1	100	0	100
197	3	2	Actellic Cement R1	2	7	0	1	0	0	0	0	0	0	0	0	0	0	0	0	0	1	0	0	1	1	0	1	0	1	1	100	0	100
198	3	2	Actellic Cement R1	2	8	0	0	1	1	0	0	0	0	0	0	0	0	2	0	1	0	1	1	1	0	2	2	0	2	1	50	100	100
200	3	2	Actellic Cement R1	2	1	0	2	0	2	0	0	0	1	0	0	0	0	3	0	0	2	3	0	5	2	3	4	0	5	1	100	60	80
201	3	2	Actellic Cement R1	2	2	0	0	0	0	0	0	0	1	0	0	0	0	1	0	0	0	1	0	1	0	1	0	0	1	1	100	100	0
202	3	2	Actellic Cement R1	2	3	0	2	0	0	0	0	0	0	0	0	0	0	0	0	0	2	0	0	2	2	0	2	0	2	1	100	0	100
203	3	2	Actellic Cement R1	2	4	2	7	0	1	0	0	0	0	0	0	0	0	1	2	0	7	1	2	8	9	1	10	0	10	1	80	10	100
204	3	2	Actellic Cement R1	2	5	0	6	0	1	0	0	0	0	0	0	0	0	1	0	0	6	1	0	7	6	1	7	0	7	1	100	14.2857	100
205	3	2	Actellic Cement R1	2	6	0	1	0	0	0	0	0	0	0	0	0	0	0	0	0	1	0	0	1	1	0	1	0	1	1	100	0	100
206	3	2	Actellic Cement R1	2	7	0	3	0	0	0	0	0	0	0	0	0	0	0	0	0	3	0	0	3	3	0	3	0	3	1	100	0	100
207	3	2	Actellic Cement R1	2	8	0	3	0	0	0	0	0	0	0	0	0	0	0	0	0	3	0	0	3	3	0	3	0	3	1	100	0	100
208	3	2	Actellic Cement R1	2	9	0	4	0	1	0	0	0	2	0	0	0	0	3	0	0	4	3	0	7	4	3	5	0	7	1	100	42.8571	71.4286
209	3	2	Actellic Cement R1	2	1	0	2	0	0	0	0	0	0	0	0	0	0	0	0	0	2	0	0	2	2	0	2	0	2	1	100	0	100
210	3	2	Actellic Cement R1	2	2	1	3	0	1	0	0	0	0	0	0	0	0	1	1	0	3	1	1	4	4	1	5	0	5	1	80	20	100
211	3	2	Actellic Cement R1	2	3	0	2	0	0	0	0	0	0	0	0	0	0	0	0	0	2	0	0	2	2	0	2	0	2	1	100	0	100
212	3	2	Actellic Cement R1	2	4	0	4	0	0	0	0	0	1	0	0	0	0	1	0	0	4	1	0	5	4	1	4	0	5	1	100	20	80
213	3	2	Actellic Cement R1	2	5	0	2	0	0	0	0	0	0	0	0	0	0	0	0	0	2	0	0	2	2	0	2	0	2	1	100	0	100
214	3	2	Actellic Cement R1	2	6	0	4	0	1	0	0	0	0	0	0	0	0	1	0	0	4	1	0	5	4	1	5	0	5	1	100	20	100
215	3	2	Actellic Cement R1	2	7	0	1	0	0	0	0	0	0	0	0	0	0	0	0	0	1	0	0	1	1	0	1	0	1	1	100	0	100
216	3	2	Actellic Cement R1	2	8	2	0	0	1	0	0	0	0	0	0	0	0	1	2	0	0	1	2	1	2	1	3	0	3	1	33.3333	33.3333	100
217	3	2	Actellic Cement R1	2	9	0	1	0	0	0	0	0	0	0	0	0	0	0	0	0	1	0	0	1	1	0	1	0	1	1	100	0	100
218	3	2	Actellic Cement R1	2	1	0	1	0	0	0	0	0	0	0	0	0	0	0	0	0	1	0	0	1	1	0	1	0	1	1	100	0	100
219	3	2	Actellic Cement R1	2	2	0	1	0	1	0	0	0	2	0	0	0	0	3	0	0	1	3	0	4	1	3	2	0	4	1	100	75	50
221	3	2	Actellic Cement R1	2	4	0	1	0	0	0	0	0	2	0	0	0	0	2	0	0	1	2	0	3	1	2	1	0	3	1	100	66.6667	33.3333
223	3	2	Actellic Cement R1	2	6	0	2	0	0	0	0	0	0	0	0	0	0	0	0	0	2	0	0	2	2	0	2	0	2	1	100	0	100
226	3	2	Actellic Cement R1	2	9	1	1	0	0	0	0	0	0	0	0	0	0	0	1	0	1	0	1	1	2	0	2	0	2	1	50	0	100
227	3	2	Actellic Cement R1	2	1	0	0	0	0	0	0	0	1	0	0	0	0	1	0	0	0	1	0	1	0	1	0	0	1	1	100	100	0
228	3	2	Actellic Cement R1	2	2	0	2	0	1	0	0	0	0	0	0	0	0	1	0	0	2	1	0	3	2	1	3	0	3	1	100	33.3333	100
230	3	2	Actellic Cement R1	2	4	0	2	0	0	0	0	0	0	0	0	0	0	0	0	0	2	0	0	2	2	0	2	0	2	1	100	0	100
231	3	2	Actellic Cement R1	2	5	0	4	0	0	0	0	0	0	0	0	0	0	0	0	0	4	0	0	4	4	0	4	0	4	1	100	0	100
233	3	2	Actellic Cement R1	2	7	0	4	0	0	0	0	0	0	0	0	0	0	0	0	0	4	0	0	4	4	0	4	0	4	1	100	0	100
234	3	2	Actellic Cement R1	2	8	2	3	0	0	0	0	0	0	0	0	0	0	0	2	0	3	0	2	3	5	0	5	0	5	1	60	0	100
237	3	2	Actellic Cement R1	2	2	0	1	0	0	0	0	0	1	0	0	0	0	1	0	0	1	1	0	2	1	1	1	0	2	1	100	50	50
238	3	2	Actellic Cement R1	2	3	0	2	0	0	0	0	0	0	0	0	0	0	0	0	0	2	0	0	2	2	0	2	0	2	1	100	0	100
239	3	2	Actellic Cement R1	2	4	0	1	0	0	0	0	0	1	0	0	0	0	1	0	0	1	1	0	2	1	1	1	0	2	1	100	50	50
255	3	2	Actellic Cement R1	2	2	0	1	0	0	0	0	0	0	0	0	0	0	0	0	0	1	0	0	1	1	0	1	0	1	1	100	0	100
256	3	2	Actellic Cement R1	2	3	1	0	0	0	0	0	0	0	0	0	0	0	0	1	0	0	0	1	0	1	0	1	0	1	1	0	0	100
257	3	2	Actellic Cement R1	2	4	0	1	0	0	0	0	0	1	0	0	0	0	1	0	0	1	1	0	2	1	1	1	0	2	1	100	50	50
261	3	2	Actellic Cement R1	2	8	0	1	0	0	0	0	0	0	0	0	0	0	0	0	0	1	0	0	1	1	0	1	0	1	1	100	0	100
262	3	2	Actellic Cement R1	2	9	0	2	0	0	0	0	0	0	0	0	0	0	0	0	0	2	0	0	2	2	0	2	0	2	1	100	0	100
264	3	2	Actellic Cement R1	2	2	1	0	0	0	0	0	0	0	0	0	0	0	0	1	0	0	0	1	0	1	0	1	0	1	1	0	0	100
265	3	2	Actellic Cement R1	2	3	0	4	0	0	0	0	0	0	0	0	0	0	0	0	0	4	0	0	4	4	0	4	0	4	1	100	0	100
267	3	2	Actellic Cement R1	2	5	1	2	0	0	0	0	0	0	0	0	0	0	0	1	0	2	0	1	2	3	0	3	0	3	1	66.6667	0	100
268	3	2	Actellic Cement R1	2	6	0	2	0	0	0	0	0	0	0	0	0	0	0	0	0	2	0	0	2	2	0	2	0	2	1	100	0	100
270	3	2	Actellic Cement R1	2	8	0	1	0	0	0	0	0	2	0	0	0	0	2	0	0	1	2	0	3	1	2	1	0	3	1	100	66.6667	33.3333
272	3	2	Actellic Cement R1	2	1	0	1	0	0	0	0	0	0	0	0	0	0	0	0	0	1	0	0	1	1	0	1	0	1	1	100	0	100
274	3	2	Actellic Cement R1	2	3	1	4	0	0	0	0	0	0	0	0	0	0	0	1	0	4	0	1	4	5	0	5	0	5	1	80	0	100
275	3	2	Actellic Cement R1	2	4	1	1	0	0	0	0	0	0	0	0	0	0	0	1	0	1	0	1	1	2	0	2	0	2	1	50	0	100
276	3	2	Actellic Cement R1	2	5	0	4	0	0	0	0	0	0	0	0	0	0	0	0	0	4	0	0	4	4	0	4	0	4	1	100	0	100
277	3	2	Actellic Cement R1	2	6	0	4	0	0	0	0	0	0	0	0	0	0	0	0	0	4	0	0	4	4	0	4	0	4	1	100	0	100
278	3	2	Actellic Cement R1	2	7	0	1	0	0	0	0	0	0	0	0	0	0	0	0	0	1	0	0	1	1	0	1	0	1	1	100	0	100
279	3	2	Actellic Cement R1	2	8	1	1	0	0	0	0	0	0	0	0	0	0	0	1	0	1	0	1	1	2	0	2	0	2	1	50	0	100
280	3	2	Actellic Cement R1	2	9	1	0	0	0	0	0	0	0	0	0	0	0	0	1	0	0	0	1	0	1	0	1	0	1	1	0	0	100
282	3	2	Actellic Cement R1	2	2	0	1	0	0	0	0	0	0	0	0	0	0	0	0	0	1	0	0	1	1	0	1	0	1	1	100	0	100
283	3	2	Actellic Cement R1	2	3	0	0	0	0	0	1	0	0	0	0	0	0	0	0	0	1	0	0	1	1	0	0	0	1	1	100	0	0
284	3	2	Actellic Cement R1	2	4	0	1	0	0	0	0	0	0	0	0	0	0	0	0	0	1	0	0	1	1	0	1	0	1	1	100	0	100
285	3	2	Actellic Cement R1	2	5	0	2	1	0	0	0	0	0	0	0	0	0	1	0	1	2	0	1	2	2	1	3	0	3	1	66.6667	33.3333	100
286	3	2	Actellic Cement R1	2	6	0	2	0	0	0	0	0	0	0	0	0	0	0	0	0	2	0	0	2	2	0	2	0	2	1	100	0	100
287	3	2	Actellic Cement R1	2	7	0	2	0	0	0	0	0	0	0	0	0	0	0	0	0	2	0	0	2	2	0	2	0	2	1	100	0	100
288	3	2	Actellic Cement R1	2	8	0	2	0	0	0	0	0	0	0	0	0	0	0	0	0	2	0	0	2	2	0	2	0	2	1	100	0	100
3	4	3	Pirikool Cement R2	1	6	0	0	0	0	0	0	0	1	0	0	0	0	0	0	0	0	1	0	1	0	1	0	0	1	1	100	100	0
5	4	3	Pirikool Cement R2	1	8	0	0	0	1	0	0	0	0	0	0	0	0	1	0	0	0	1	0	1	0	1	1	0	1	1	100	100	100
6	4	3	Pirikool Cement R2	1	9	0	0	0	0	0	0	0	2	0	0	0	0	2	0	0	0	2	0	2	0	2	0	0	2	1	100	100	0
7	4	3	Pirikool Cement R2	1	1	0	0	0	1	0	0	0	2	0	0	0	0	3	0	0	0	3	0	3	0	3	1	0	3	1	100	100	33.3333
8	4	3	Pirikool Cement R2	1	2	0	0	0	1	0	0	0	2	0	0	0	0	3	0	0	0	3	0	3	0	3	1	0	3	1	100	100	33.3333
10	4	3	Pirikool Cement R2	1	4	0	0	0	2	0	0	0	3	0	0	0	0	4	0	0	0	5	0	5	0	5	2	0	5	1	100	100	40
11	4	3	Pirikool Cement R2	1	5	0	0	0	1	0	0	0	1	0	0	0	0	1	0	0	0	2	0	2	0	2	1	0	2	1	100	100	50
12	4	3	Pirikool Cement R2	1	6	0	0	0	4	0	0	0	1	0	0	0	0	2	0	0	0	5	0	5	0	5	4	0	5	1	100	100	80
13	4	3	Pirikool Cement R2	1	7	0	0	0	1	0	0	0	0	0	0	0	0	1	0	0	0	1	0	1	0	1	1	0	1	1	100	100	100
14	4	3	Pirikool Cement R2	1	8	0	0	0	3	0	0	0	1	0	0	0	0	4	0	0	0	4	0	4	0	4	3	0	4	1	100	100	75
15	4	3	Pirikool Cement R2	1	9	0	1	0	0	0	0	0	1	0	0	0	0	1	0	0	1	1	0	2	1	1	1	0	2	1	100	50	50
16	4	3	Pirikool Cement R2	1	1	0	2	0	5	0	0	0	4	0	0	0	0	9	0	0	2	9	0	11	2	9	7	0	11	1	100	81.8182	63.6364
17	4	3	Pirikool Cement R2	1	2	0	0	0	3	0	0	0	8	0	0	0	0	10	0	0	0	11	0	11	0	11	3	0	11	1	100	100	27.2727
18	4	3	Pirikool Cement R2	1	3	0	0	0	1	0	0	0	1	0	0	0	0	2	0	0	0	2	0	2	0	2	1	0	2	1	100	100	50
19	4	3	Pirikool Cement R2	1	4	0	0	0	1	0	0	0	5	0	0	0	0	6	0	0	0	6	0	6	0	6	1	0	6	1	100	100	16.6667
20	4	3	Pirikool Cement R2	1	5	0	0	0	2	0	0	0	1	0	0	0	0	2	0	0	0	3	0	3	0	3	2	0	3	1	100	100	66.6667
21	4	3	Pirikool Cement R2	1	6	0	2	0	9	0	0	0	2	0	0	0	0	9	0	0	2	11	0	13	2	11	11	0	13	1	100	84.6154	84.6154
22	4	3	Pirikool Cement R2	1	7	0	1	0	12	0	0	0	18	0	0	0	0	27	0	0	1	30	0	31	1	30	13	0	31	1	100	96.7742	41.9355
23	4	3	Pirikool Cement R2	1	8	0	0	0	1	0	0	0	4	0	0	0	0	5	0	0	0	5	0	5	0	5	1	0	5	1	100	100	20
24	4	3	Pirikool Cement R2	1	9	0	0	0	1	0	0	0	5	0	0	0	0	6	0	0	0	6	0	6	0	6	1	0	6	1	100	100	16.6667
25	4	3	Pirikool Cement R2	1	1	0	0	1	3	0	0	0	6	0	0	0	0	10	0	1	0	9	1	9	0	10	4	0	10	1	90	100	40
26	4	3	Pirikool Cement R2	1	2	0	0	0	5	0	0	0	7	0	0	0	0	12	0	0	0	12	0	12	0	12	5	0	12	1	100	100	41.6667
27	4	3	Pirikool Cement R2	1	3	0	0	0	0	0	0	0	3	0	0	0	0	3	0	0	0	3	0	3	0	3	0	0	3	1	100	100	0
28	4	3	Pirikool Cement R2	1	4	0	3	1	10	0	0	0	1	0	0	0	0	12	0	1	3	11	1	14	3	12	14	0	15	1	93.3333	80	93.3333
29	4	3	Pirikool Cement R2	1	5	0	1	0	2	0	0	0	5	0	0	0	0	6	0	0	1	7	0	8	1	7	3	0	8	1	100	87.5	37.5
30	4	3	Pirikool Cement R2	1	6	0	0	0	6	0	0	0	0	0	0	0	0	5	0	0	0	6	0	6	0	6	6	0	6	1	100	100	100
31	4	3	Pirikool Cement R2	1	7	0	0	0	4	0	0	0	4	0	0	0	0	7	0	0	0	8	0	8	0	8	4	0	8	1	100	100	50
32	4	3	Pirikool Cement R2	1	8	0	0	0	3	0	0	0	3	0	0	0	0	6	0	0	0	6	0	6	0	6	3	0	6	1	100	100	50
33	4	3	Pirikool Cement R2	1	9	0	1	0	9	0	0	0	1	0	0	0	0	9	0	0	1	10	0	11	1	10	10	0	11	1	100	90.9091	90.9091
34	4	3	Pirikool Cement R2	1	1	0	0	0	2	0	0	0	2	0	0	0	0	4	0	0	0	4	0	4	0	4	2	0	4	1	100	100	50
35	4	3	Pirikool Cement R2	1	2	0	2	1	5	0	0	0	2	0	0	0	0	8	0	1	2	7	1	9	2	8	8	0	10	1	90	80	80
36	4	3	Pirikool Cement R2	1	3	0	0	0	1	0	0	0	1	0	0	0	0	2	0	0	0	2	0	2	0	2	1	0	2	1	100	100	50
37	4	3	Pirikool Cement R2	1	4	0	1	0	2	0	0	0	3	0	0	0	0	5	0	0	1	5	0	6	1	5	3	0	6	1	100	83.3333	50
38	4	3	Pirikool Cement R2	1	5	0	1	0	8	0	0	0	5	0	0	0	0	13	0	0	1	13	0	14	1	13	9	0	14	1	100	92.8571	64.2857
39	4	3	Pirikool Cement R2	1	6	0	0	0	2	0	0	0	8	0	0	0	0	10	0	0	0	10	0	10	0	10	2	0	10	1	100	100	20
41	4	3	Pirikool Cement R2	1	8	0	0	0	8	0	0	0	4	0	0	0	0	12	0	0	0	12	0	12	0	12	8	0	12	1	100	100	66.6667
42	4	3	Pirikool Cement R2	1	9	0	0	1	5	0	0	1	6	0	0	0	0	13	0	2	0	11	2	11	0	13	6	0	13	1	84.6154	100	46.1538
43	4	3	Pirikool Cement R2	1	1	0	0	0	1	0	0	0	4	0	0	0	0	5	0	0	0	5	0	5	0	5	1	0	5	1	100	100	20
44	4	3	Pirikool Cement R2	1	2	0	2	0	12	0	0	0	5	0	0	0	0	17	0	0	2	17	0	19	2	17	14	0	19	1	100	89.4737	73.6842
45	4	3	Pirikool Cement R2	1	3	0	0	1	2	0	0	0	5	0	0	0	0	7	0	1	0	7	1	7	0	8	3	0	8	1	87.5	100	37.5
46	4	3	Pirikool Cement R2	1	4	0	1	1	12	0	0	1	19	0	0	0	0	33	0	2	1	31	2	32	1	33	14	0	34	1	94.1176	97.0588	41.1765
47	4	3	Pirikool Cement R2	1	5	0	0	0	7	0	0	0	10	0	0	0	0	17	0	0	0	17	0	17	0	17	7	0	17	1	100	100	41.1765
48	4	3	Pirikool Cement R2	1	6	0	0	0	19	0	0	0	11	0	0	0	0	29	0	0	0	30	0	30	0	30	19	0	30	1	100	100	63.3333
49	4	3	Pirikool Cement R2	1	7	0	1	0	15	0	0	0	29	0	0	0	0	42	0	0	1	44	0	45	1	44	16	0	45	1	100	97.7778	35.5556
50	4	3	Pirikool Cement R2	1	8	0	0	1	8	0	0	0	19	0	0	0	0	28	0	1	0	27	1	27	0	28	9	0	28	1	96.4286	100	32.1429
51	4	3	Pirikool Cement R2	1	9	0	0	0	21	0	0	0	15	0	0	0	0	32	0	0	0	36	0	36	0	36	21	0	36	1	100	100	58.3333
52	4	3	Pirikool Cement R2	1	1	0	0	1	10	0	0	0	5	0	0	0	0	16	0	1	0	15	1	15	0	16	11	0	16	1	93.75	100	68.75
53	4	3	Pirikool Cement R2	1	2	0	0	1	26	0	0	2	22	0	0	0	0	51	0	3	0	48	3	48	0	51	27	0	51	1	94.1176	100	52.9412
54	4	3	Pirikool Cement R2	1	3	0	1	1	8	0	0	0	5	0	0	0	0	14	0	1	1	13	1	14	1	14	10	0	15	1	93.3333	93.3333	66.6667
67	4	3	Pirikool Cement R2	1	4	0	0	2	5	0	0	0	15	0	0	0	0	22	0	2	0	20	2	20	0	22	7	0	22	1	90.9091	100	31.8182
68	4	3	Pirikool Cement R2	1	5	0	0	1	12	0	0	1	30	0	0	0	0	44	0	2	0	42	2	42	0	44	13	0	44	1	95.4545	100	29.5455
69	4	3	Pirikool Cement R2	1	6	0	0	0	12	0	0	0	10	0	0	0	0	20	0	0	0	22	0	22	0	22	12	0	22	1	100	100	54.5455
70	4	3	Pirikool Cement R2	1	7	0	0	0	14	0	0	0	29	0	0	0	0	43	0	0	0	43	0	43	0	43	14	0	43	1	100	100	32.5581
71	4	3	Pirikool Cement R2	1	8	0	0	0	3	0	0	0	14	0	0	0	0	17	0	0	0	17	0	17	0	17	3	0	17	1	100	100	17.6471
72	4	3	Pirikool Cement R2	1	9	0	1	2	12	0	0	0	18	0	0	0	0	31	0	2	1	30	2	31	1	32	15	0	33	1	93.9394	96.9697	45.4545
73	4	3	Pirikool Cement R2	1	1	0	0	2	12	0	0	0	6	0	0	0	0	20	0	2	0	18	2	18	0	20	14	0	20	1	90	100	70
74	4	3	Pirikool Cement R2	1	2	0	0	2	2	0	0	1	7	0	0	0	0	11	0	3	0	9	3	9	0	12	4	0	12	1	75	100	33.3333
75	4	3	Pirikool Cement R2	1	3	0	0	0	2	0	0	1	4	0	0	0	0	7	0	1	0	6	1	6	0	7	2	0	7	1	85.7143	100	28.5714
76	4	3	Pirikool Cement R2	1	4	0	0	0	14	0	0	3	24	0	0	0	0	39	0	3	0	38	3	38	0	41	14	0	41	1	92.6829	100	34.1463
77	4	3	Pirikool Cement R2	1	5	0	0	2	5	0	0	0	8	0	0	0	0	15	0	2	0	13	2	13	0	15	7	0	15	1	86.6667	100	46.6667
78	4	3	Pirikool Cement R2	1	6	0	0	1	14	0	0	1	9	0	0	0	0	23	0	2	0	23	2	23	0	25	15	0	25	1	92	100	60
79	4	3	Pirikool Cement R2	1	7	0	0	3	4	0	0	1	6	0	0	0	0	12	0	4	0	10	4	10	0	14	7	0	14	1	71.4286	100	50
80	4	3	Pirikool Cement R2	1	8	0	0	1	7	0	0	0	9	0	0	0	0	17	0	1	0	16	1	16	0	17	8	0	17	1	94.1176	100	47.0588
81	4	3	Pirikool Cement R2	1	9	0	0	0	5	0	0	0	20	0	0	0	0	25	0	0	0	25	0	25	0	25	5	0	25	1	100	100	20
82	4	3	Pirikool Cement R2	1	1	0	1	0	7	0	0	0	9	0	0	0	0	14	0	0	1	16	0	17	1	16	8	0	17	1	100	94.1176	47.0588
83	4	3	Pirikool Cement R2	1	2	0	0	0	0	0	0	0	3	0	0	0	0	3	0	0	0	3	0	3	0	3	0	0	3	1	100	100	0
84	4	3	Pirikool Cement R2	1	3	0	0	0	1	0	0	0	3	0	0	0	0	3	0	0	0	4	0	4	0	4	1	0	4	1	100	100	25
85	4	3	Pirikool Cement R2	1	4	0	0	0	3	0	0	0	7	0	0	0	0	8	0	0	0	10	0	10	0	10	3	0	10	1	100	100	30
86	4	3	Pirikool Cement R2	1	5	0	1	1	4	0	0	0	1	0	0	0	0	4	0	1	1	5	1	6	1	6	6	0	7	1	85.7143	85.7143	85.7143
87	4	3	Pirikool Cement R2	1	6	0	0	0	3	0	0	0	6	0	0	0	0	7	0	0	0	9	0	9	0	9	3	0	9	1	100	100	33.3333
88	4	3	Pirikool Cement R2	1	7	0	0	0	1	0	0	0	10	0	0	0	0	11	0	0	0	11	0	11	0	11	1	0	11	1	100	100	9.09091
89	4	3	Pirikool Cement R2	1	8	0	0	0	0	0	0	0	5	0	0	0	0	5	0	0	0	5	0	5	0	5	0	0	5	1	100	100	0
90	4	3	Pirikool Cement R2	1	9	0	0	0	1	0	0	0	5	0	0	0	0	5	0	0	0	6	0	6	0	6	1	0	6	1	100	100	16.6667
91	4	3	Pirikool Cement R2	1	1	0	0	0	4	0	0	2	18	0	0	0	0	24	0	2	0	22	2	22	0	24	4	0	24	1	91.6667	100	16.6667
92	4	3	Pirikool Cement R2	1	2	0	0	0	8	0	0	0	9	0	0	0	0	13	0	0	0	17	0	17	0	17	8	0	17	1	100	100	47.0588
93	4	3	Pirikool Cement R2	1	3	0	0	1	9	0	0	2	14	0	0	0	0	26	0	3	0	23	3	23	0	26	10	0	26	1	88.4615	100	38.4615
94	4	3	Pirikool Cement R2	1	4	0	0	0	5	0	0	0	5	0	0	0	0	8	0	0	0	10	0	10	0	10	5	0	10	1	100	100	50
95	4	3	Pirikool Cement R2	1	5	0	2	0	6	0	0	0	2	0	0	0	0	7	0	0	2	8	0	10	2	8	8	0	10	1	100	80	80
96	4	3	Pirikool Cement R2	1	6	0	0	0	7	0	0	0	9	0	0	0	0	16	0	0	0	16	0	16	0	16	7	0	16	1	100	100	43.75
97	4	3	Pirikool Cement R2	1	7	0	0	0	5	0	0	0	9	0	0	0	0	14	0	0	0	14	0	14	0	14	5	0	14	1	100	100	35.7143
98	4	3	Pirikool Cement R2	1	8	0	0	0	2	0	0	0	6	0	0	0	0	8	0	0	0	8	0	8	0	8	2	0	8	1	100	100	25
99	4	3	Pirikool Cement R2	1	9	0	0	0	3	0	0	0	5	0	0	0	0	6	0	0	0	8	0	8	0	8	3	0	8	1	100	100	37.5
100	4	3	Pirikool Cement R2	1	1	1	2	0	6	0	0	0	9	0	0	0	0	14	1	0	2	15	1	17	3	15	9	0	18	1	94.4444	83.3333	50
101	4	3	Pirikool Cement R2	1	2	0	0	0	2	0	0	0	5	0	0	0	0	7	0	0	0	7	0	7	0	7	2	0	7	1	100	100	28.5714
102	4	3	Pirikool Cement R2	1	3	0	0	0	7	0	0	0	4	0	0	0	0	11	0	0	0	11	0	11	0	11	7	0	11	1	100	100	63.6364
103	4	3	Pirikool Cement R2	1	4	0	0	0	9	0	0	0	9	0	0	0	0	18	0	0	0	18	0	18	0	18	9	0	18	1	100	100	50
104	4	3	Pirikool Cement R2	1	5	0	0	0	3	0	0	0	7	0	0	0	0	10	0	0	0	10	0	10	0	10	3	0	10	1	100	100	30
105	4	3	Pirikool Cement R2	1	6	0	0	0	9	0	0	0	10	0	0	0	0	17	0	0	0	19	0	19	0	19	9	0	19	1	100	100	47.3684
106	4	3	Pirikool Cement R2	1	7	0	0	0	13	0	0	0	7	0	0	0	0	20	0	0	0	20	0	20	0	20	13	0	20	1	100	100	65
107	4	3	Pirikool Cement R2	1	8	0	0	0	0	0	0	0	4	0	0	0	0	4	0	0	0	4	0	4	0	4	0	0	4	1	100	100	0
108	4	3	Pirikool Cement R2	1	9	0	0	0	10	0	0	0	7	0	0	0	0	17	0	0	0	17	0	17	0	17	10	0	17	1	100	100	58.8235
109	4	3	Pirikool Cement R2	1	1	0	0	0	7	0	0	0	5	0	0	0	0	11	0	0	0	12	0	12	0	12	7	0	12	1	100	100	58.3333
110	4	3	Pirikool Cement R2	1	2	0	0	0	10	0	0	0	0	0	0	0	0	10	0	0	0	10	0	10	0	10	10	0	10	1	100	100	100
111	4	3	Pirikool Cement R2	1	3	0	0	0	3	0	0	0	3	0	0	0	0	6	0	0	0	6	0	6	0	6	3	0	6	1	100	100	50
112	4	3	Pirikool Cement R2	1	4	0	0	0	6	0	0	0	5	0	0	0	0	11	0	0	0	11	0	11	0	11	6	0	11	1	100	100	54.5455
113	4	3	Pirikool Cement R2	1	5	0	0	2	3	0	0	0	0	0	0	0	0	5	0	2	0	3	2	3	0	5	5	0	5	1	60	100	100
115	4	3	Pirikool Cement R2	1	7	0	0	0	4	0	0	0	3	0	0	0	0	6	0	0	0	7	0	7	0	7	4	0	7	1	100	100	57.1429
116	4	3	Pirikool Cement R2	1	8	0	0	0	2	0	0	0	3	0	0	0	0	5	0	0	0	5	0	5	0	5	2	0	5	1	100	100	40
117	4	3	Pirikool Cement R2	1	9	0	0	0	3	0	0	0	0	0	0	0	0	3	0	0	0	3	0	3	0	3	3	0	3	1	100	100	100
118	4	3	Pirikool Cement R2	1	1	0	0	0	2	0	0	0	8	0	0	0	0	10	0	0	0	10	0	10	0	10	2	0	10	1	100	100	20
119	4	3	Pirikool Cement R2	1	2	0	0	0	4	0	0	0	3	0	0	0	0	7	0	0	0	7	0	7	0	7	4	0	7	1	100	100	57.1429
120	4	3	Pirikool Cement R2	1	3	0	0	0	5	0	0	0	2	0	0	0	0	7	0	0	0	7	0	7	0	7	5	0	7	1	100	100	71.4286
121	4	3	Pirikool Cement R2	1	4	0	1	0	7	0	0	0	2	0	0	0	0	7	0	0	1	9	0	10	1	9	8	0	10	1	100	90	80
122	4	3	Pirikool Cement R2	1	5	1	1	0	2	0	0	0	0	0	0	0	0	2	1	0	1	2	1	3	2	2	4	0	4	1	75	50	100
123	4	3	Pirikool Cement R2	1	6	1	5	0	4	0	0	0	1	0	0	0	0	5	1	0	5	5	1	10	6	5	10	0	11	1	90.9091	45.4545	90.9091
124	4	3	Pirikool Cement R2	1	7	0	1	0	1	0	0	0	1	0	0	0	0	2	0	0	1	2	0	3	1	2	2	0	3	1	100	66.6667	66.6667
126	4	3	Pirikool Cement R2	1	9	0	0	0	0	0	0	0	1	0	0	0	0	1	0	0	0	1	0	1	0	1	0	0	1	1	100	100	0
127	4	3	Pirikool Cement R2	1	1	0	0	0	3	0	0	0	1	0	0	0	0	4	0	0	0	4	0	4	0	4	3	0	4	1	100	100	75
128	4	3	Pirikool Cement R2	1	2	0	4	0	3	0	0	0	3	0	0	0	0	6	0	0	4	6	0	10	4	6	7	0	10	1	100	60	70
129	4	3	Pirikool Cement R2	1	3	0	2	0	5	0	0	0	8	0	0	0	0	12	0	0	2	13	0	15	2	13	7	0	15	1	100	86.6667	46.6667
130	4	3	Pirikool Cement R2	1	4	0	2	0	7	0	0	0	7	0	0	0	0	11	0	0	2	14	0	16	2	14	9	0	16	1	100	87.5	56.25
131	4	3	Pirikool Cement R2	1	5	0	0	0	10	0	0	0	0	0	0	0	0	6	0	0	0	10	0	10	0	10	10	0	10	1	100	100	100
132	4	3	Pirikool Cement R2	1	6	0	5	0	9	0	0	0	8	0	0	0	0	16	0	0	5	17	0	22	5	17	14	0	22	1	100	77.2727	63.6364
133	4	3	Pirikool Cement R2	1	7	0	1	0	2	0	0	0	3	0	0	0	0	5	0	0	1	5	0	6	1	5	3	0	6	1	100	83.3333	50
134	4	3	Pirikool Cement R2	1	8	0	1	0	5	0	0	0	0	0	0	0	0	4	0	0	1	5	0	6	1	5	6	0	6	1	100	83.3333	100
135	4	3	Pirikool Cement R2	1	9	0	0	0	6	0	0	0	4	0	0	0	0	9	0	0	0	10	0	10	0	10	6	0	10	1	100	100	60
136	4	3	Pirikool Cement R2	1	1	0	0	0	14	0	0	0	10	0	0	0	0	24	0	0	0	24	0	24	0	24	14	0	24	1	100	100	58.3333
137	4	3	Pirikool Cement R2	1	2	0	0	0	4	0	0	0	5	0	0	0	0	7	0	0	0	9	0	9	0	9	4	0	9	1	100	100	44.4444
138	4	3	Pirikool Cement R2	1	3	0	0	0	6	0	0	0	4	0	0	0	0	8	0	0	0	10	0	10	0	10	6	0	10	1	100	100	60
139	4	3	Pirikool Cement R2	1	4	0	0	0	15	0	0	0	5	0	0	0	0	17	0	0	0	20	0	20	0	20	15	0	20	1	100	100	75
140	4	3	Pirikool Cement R2	1	5	0	1	0	3	0	0	0	0	0	0	0	0	0	0	0	1	3	0	4	1	3	4	0	4	1	100	75	100
141	4	3	Pirikool Cement R2	1	6	0	0	0	3	0	0	0	5	0	0	0	0	7	0	0	0	8	0	8	0	8	3	0	8	1	100	100	37.5
142	4	3	Pirikool Cement R2	1	7	0	0	0	7	0	0	0	11	0	0	0	0	14	0	0	0	18	0	18	0	18	7	0	18	1	100	100	38.8889
143	4	3	Pirikool Cement R2	1	8	0	3	0	3	0	0	0	4	0	0	0	0	7	0	0	3	7	0	10	3	7	6	0	10	1	100	70	60
144	4	3	Pirikool Cement R2	1	9	0	1	0	0	0	0	0	8	0	0	0	0	8	0	0	1	8	0	9	1	8	1	0	9	1	100	88.8889	11.1111
145	4	3	Pirikool Cement R2	1	1	1	0	0	2	0	0	0	3	0	0	0	0	5	1	0	0	5	1	5	1	5	3	0	6	1	83.3333	83.3333	50
146	4	3	Pirikool Cement R2	1	2	0	1	0	4	0	0	0	6	0	0	0	0	8	0	0	1	10	0	11	1	10	5	0	11	1	100	90.9091	45.4545
147	4	3	Pirikool Cement R2	1	3	1	6	0	1	0	0	0	8	0	0	0	0	9	1	0	6	9	1	15	7	9	8	0	16	1	93.75	56.25	50
148	4	3	Pirikool Cement R2	1	4	0	6	0	0	0	0	0	9	0	0	0	0	9	0	0	6	9	0	15	6	9	6	0	15	1	100	60	40
149	4	3	Pirikool Cement R2	1	5	0	4	0	3	0	0	1	3	0	0	0	0	7	0	1	4	6	1	10	4	7	7	0	11	1	90.9091	63.6364	63.6364
150	4	3	Pirikool Cement R2	1	6	0	4	0	3	0	0	0	0	0	0	0	0	3	0	0	4	3	0	7	4	3	7	0	7	1	100	42.8571	100
151	4	3	Pirikool Cement R2	1	7	0	2	0	0	0	0	0	1	0	0	0	0	1	0	0	2	1	0	3	2	1	2	0	3	1	100	33.3333	66.6667
152	4	3	Pirikool Cement R2	1	8	0	4	0	3	0	0	0	4	0	0	0	0	7	0	0	4	7	0	11	4	7	7	0	11	1	100	63.6364	63.6364
153	4	3	Pirikool Cement R2	1	9	0	3	0	6	0	0	0	0	0	0	0	0	6	0	0	3	6	0	9	3	6	9	0	9	1	100	66.6667	100
154	4	3	Pirikool Cement R2	1	1	0	1	0	3	0	0	0	5	0	0	0	0	7	0	0	1	8	0	9	1	8	4	0	9	1	100	88.8889	44.4444
155	4	3	Pirikool Cement R2	1	2	0	3	0	3	0	0	0	14	0	0	0	0	16	0	0	3	17	0	20	3	17	6	0	20	1	100	85	30
156	4	3	Pirikool Cement R2	1	3	0	2	0	3	0	0	0	3	0	0	0	0	5	0	0	2	6	0	8	2	6	5	0	8	1	100	75	62.5
157	4	3	Pirikool Cement R2	1	4	0	3	0	8	0	0	0	8	0	0	0	0	13	0	0	3	16	0	19	3	16	11	0	19	1	100	84.2105	57.8947
158	4	3	Pirikool Cement R2	1	5	0	5	0	3	0	0	0	0	0	0	0	0	3	0	0	5	3	0	8	5	3	8	0	8	1	100	37.5	100
159	4	3	Pirikool Cement R2	1	6	0	2	0	2	0	0	0	3	0	0	0	0	5	0	0	2	5	0	7	2	5	4	0	7	1	100	71.4286	57.1429
160	4	3	Pirikool Cement R2	1	7	0	5	0	4	0	0	0	9	0	0	0	0	13	0	0	5	13	0	18	5	13	9	0	18	1	100	72.2222	50
161	4	3	Pirikool Cement R2	1	8	0	1	0	2	0	0	0	3	0	0	0	0	4	0	0	1	5	0	6	1	5	3	0	6	1	100	83.3333	50
162	4	3	Pirikool Cement R2	1	9	0	2	0	2	0	0	0	4	0	0	0	0	6	0	0	2	6	0	8	2	6	4	0	8	1	100	75	50
163	4	3	Pirikool Cement R2	1	1	0	3	0	5	0	0	0	4	0	0	0	0	9	0	0	3	9	0	12	3	9	8	0	12	1	100	75	66.6667
164	4	3	Pirikool Cement R2	1	2	0	6	0	3	0	0	0	2	0	0	0	0	5	0	0	6	5	0	11	6	5	9	0	11	1	100	45.4545	81.8182
165	4	3	Pirikool Cement R2	1	3	0	6	0	4	0	0	0	4	0	0	0	0	8	0	0	6	8	0	14	6	8	10	0	14	1	100	57.1429	71.4286
166	4	3	Pirikool Cement R2	1	4	0	9	0	6	0	0	0	4	0	0	0	0	8	0	0	9	10	0	19	9	10	15	0	19	1	100	52.6316	78.9474
167	4	3	Pirikool Cement R2	1	5	0	6	0	2	0	0	0	0	0	0	0	0	2	0	0	6	2	0	8	6	2	8	0	8	1	100	25	100
168	4	3	Pirikool Cement R2	1	6	0	2	0	7	0	0	0	3	0	0	0	0	8	0	0	2	10	0	12	2	10	9	0	12	1	100	83.3333	75
169	4	3	Pirikool Cement R2	1	7	0	3	0	5	0	0	0	10	0	0	0	0	15	0	0	3	15	0	18	3	15	8	0	18	1	100	83.3333	44.4444
170	4	3	Pirikool Cement R2	1	8	0	12	0	4	0	0	0	6	0	0	0	0	10	0	0	12	10	0	22	12	10	16	0	22	1	100	45.4545	72.7273
171	4	3	Pirikool Cement R2	1	9	0	1	0	3	0	0	0	0	0	0	0	0	3	0	0	1	3	0	4	1	3	4	0	4	1	100	75	100
172	4	3	Pirikool Cement R2	1	1	0	9	0	5	0	0	0	8	0	0	0	0	13	0	0	9	13	0	22	9	13	14	0	22	1	100	59.0909	63.6364
173	4	3	Pirikool Cement R2	1	2	0	4	0	5	0	0	0	18	0	0	0	0	23	0	0	4	23	0	27	4	23	9	0	27	1	100	85.1852	33.3333
174	4	3	Pirikool Cement R2	1	3	0	7	0	23	0	0	0	24	0	0	0	0	40	0	0	7	47	0	54	7	47	30	0	54	1	100	87.037	55.5556
175	4	3	Pirikool Cement R2	1	4	0	3	0	4	0	0	0	7	0	0	0	0	11	0	0	3	11	0	14	3	11	7	0	14	1	100	78.5714	50
176	4	3	Pirikool Cement R2	1	5	0	6	0	9	0	0	0	0	0	0	0	0	7	0	0	6	9	0	15	6	9	15	0	15	1	100	60	100
177	4	3	Pirikool Cement R2	1	6	0	11	0	18	0	0	0	9	0	0	0	0	27	0	0	11	27	0	38	11	27	29	0	38	1	100	71.0526	76.3158
178	4	3	Pirikool Cement R2	1	7	0	6	0	13	0	0	0	6	0	0	0	0	18	0	0	6	19	0	25	6	19	19	0	25	1	100	76	76
179	4	3	Pirikool Cement R2	1	8	0	2	0	6	0	0	0	4	0	0	0	0	10	0	0	2	10	0	12	2	10	8	0	12	1	100	83.3333	66.6667
180	4	3	Pirikool Cement R2	1	9	0	1	0	1	0	0	0	0	0	0	0	0	1	0	0	1	1	0	2	1	1	2	0	2	1	100	50	100
181	4	3	Pirikool Cement R2	1	1	0	8	0	2	0	0	0	4	0	0	0	0	6	0	0	8	6	0	14	8	6	10	0	14	1	100	42.8571	71.4286
182	4	3	Pirikool Cement R2	1	2	0	1	0	3	0	0	0	6	0	0	0	0	9	0	0	1	9	0	10	1	9	4	0	10	1	100	90	40
183	4	3	Pirikool Cement R2	1	3	0	1	0	2	0	0	0	11	0	0	0	0	13	0	0	1	13	0	14	1	13	3	0	14	1	100	92.8571	21.4286
184	4	3	Pirikool Cement R2	1	4	0	3	0	3	0	0	0	6	0	0	0	0	9	0	0	3	9	0	12	3	9	6	0	12	1	100	75	50
185	4	3	Pirikool Cement R2	1	5	0	2	0	1	0	0	0	3	0	0	0	0	4	0	0	2	4	0	6	2	4	3	0	6	1	100	66.6667	50
186	4	3	Pirikool Cement R2	1	6	0	9	0	2	0	0	0	12	0	0	0	0	14	0	0	9	14	0	23	9	14	11	0	23	1	100	60.8696	47.8261
187	4	3	Pirikool Cement R2	1	7	1	4	0	3	0	0	0	4	0	0	0	0	6	1	0	4	7	1	11	5	7	8	0	12	1	91.6667	58.3333	66.6667
188	4	3	Pirikool Cement R2	1	8	0	8	0	7	0	0	0	0	0	0	0	0	4	0	0	8	7	0	15	8	7	15	0	15	1	100	46.6667	100
189	4	3	Pirikool Cement R2	1	9	0	5	0	1	0	0	0	6	0	0	0	0	7	0	0	5	7	0	12	5	7	6	0	12	1	100	58.3333	50
190	4	3	Pirikool Cement R2	1	1	0	1	0	6	0	0	0	9	0	0	0	0	13	0	0	1	15	0	16	1	15	7	0	16	1	100	93.75	43.75
191	4	3	Pirikool Cement R2	1	2	0	3	0	3	0	0	0	9	0	0	0	0	12	0	0	3	12	0	15	3	12	6	0	15	1	100	80	40
192	4	3	Pirikool Cement R2	1	3	0	1	0	3	0	0	0	8	0	0	0	0	11	0	0	1	11	0	12	1	11	4	0	12	1	100	91.6667	33.3333
193	4	3	Pirikool Cement R2	1	4	0	1	0	9	0	0	0	0	0	0	0	0	9	0	0	1	9	0	10	1	9	10	0	10	1	100	90	100
194	4	3	Pirikool Cement R2	1	5	0	2	0	4	0	0	0	0	0	0	0	0	2	0	0	2	4	0	6	2	4	6	0	6	1	100	66.6667	100
195	4	3	Pirikool Cement R2	1	6	0	1	0	3	0	0	0	12	0	0	0	0	15	0	0	1	15	0	16	1	15	4	0	16	1	100	93.75	25
196	4	3	Pirikool Cement R2	1	7	0	1	0	1	0	0	0	3	0	0	0	0	4	0	0	1	4	0	5	1	4	2	0	5	1	100	80	40
197	4	3	Pirikool Cement R2	1	8	0	1	1	3	0	0	0	2	0	0	0	0	6	0	1	1	5	1	6	1	6	5	0	7	1	85.7143	85.7143	71.4286
198	4	3	Pirikool Cement R2	1	9	0	0	0	6	0	0	0	8	0	0	0	0	14	0	0	0	14	0	14	0	14	6	0	14	1	100	100	42.8571
199	4	3	Pirikool Cement R2	1	1	0	0	0	2	0	0	0	1	0	0	0	0	2	0	0	0	3	0	3	0	3	2	0	3	1	100	100	66.6667
200	4	3	Pirikool Cement R2	1	2	0	0	0	0	0	0	0	1	0	0	0	0	1	0	0	0	1	0	1	0	1	0	0	1	1	100	100	0
201	4	3	Pirikool Cement R2	1	3	0	4	0	3	0	0	0	6	0	0	0	0	9	0	0	4	9	0	13	4	9	7	0	13	1	100	69.2308	53.8462
202	4	3	Pirikool Cement R2	1	4	0	0	0	0	0	0	0	6	0	0	0	0	6	0	0	0	6	0	6	0	6	0	0	6	1	100	100	0
204	4	3	Pirikool Cement R2	1	6	0	6	0	4	0	0	0	2	0	0	0	0	6	0	0	6	6	0	12	6	6	10	0	12	1	100	50	83.3333
205	4	3	Pirikool Cement R2	1	7	0	3	0	3	0	0	0	5	0	0	0	0	6	0	0	3	8	0	11	3	8	6	0	11	1	100	72.7273	54.5455
206	4	3	Pirikool Cement R2	1	8	0	1	0	2	0	0	0	2	0	0	0	0	4	0	0	1	4	0	5	1	4	3	0	5	1	100	80	60
207	4	3	Pirikool Cement R2	1	9	0	0	0	0	0	0	0	6	0	0	0	0	6	0	0	0	6	0	6	0	6	0	0	6	1	100	100	0
208	4	3	Pirikool Cement R2	1	1	0	2	0	3	0	0	0	3	0	0	0	0	6	0	0	2	6	0	8	2	6	5	0	8	1	100	75	62.5
209	4	3	Pirikool Cement R2	1	2	0	1	0	0	0	0	0	12	0	0	0	0	12	0	0	1	12	0	13	1	12	1	0	13	1	100	92.3077	7.69231
210	4	3	Pirikool Cement R2	1	3	2	0	0	1	0	0	0	3	0	0	0	0	4	2	0	0	4	2	4	2	4	3	0	6	1	66.6667	66.6667	50
211	4	3	Pirikool Cement R2	1	4	0	3	0	0	0	0	0	0	0	0	0	0	0	0	0	3	0	0	3	3	0	3	0	3	1	100	0	100
213	4	3	Pirikool Cement R2	1	6	0	2	0	0	0	0	0	2	0	0	0	0	2	0	0	2	2	0	4	2	2	2	0	4	1	100	50	50
214	4	3	Pirikool Cement R2	1	7	0	1	0	2	0	0	0	0	0	0	0	0	1	0	0	1	2	0	3	1	2	3	0	3	1	100	66.6667	100
216	4	3	Pirikool Cement R2	1	9	0	0	0	0	0	0	0	4	0	0	0	0	4	0	0	0	4	0	4	0	4	0	0	4	1	100	100	0
217	4	3	Pirikool Cement R2	1	1	0	3	0	2	0	0	0	1	0	0	0	0	2	0	0	3	3	0	6	3	3	5	0	6	1	100	50	83.3333
218	4	3	Pirikool Cement R2	1	2	0	1	0	1	0	0	0	10	0	0	0	0	11	0	0	1	11	0	12	1	11	2	0	12	1	100	91.6667	16.6667
219	4	3	Pirikool Cement R2	1	3	0	2	0	2	0	0	0	0	0	0	0	0	1	0	0	2	2	0	4	2	2	4	0	4	1	100	50	100
220	4	3	Pirikool Cement R2	1	4	2	1	0	2	0	0	0	0	0	0	0	0	2	2	0	1	2	2	3	3	2	5	0	5	1	60	40	100
221	4	3	Pirikool Cement R2	1	5	0	1	0	0	0	0	0	0	0	0	0	0	0	0	0	1	0	0	1	1	0	1	0	1	1	100	0	100
223	4	3	Pirikool Cement R2	1	7	0	0	0	2	0	0	0	0	0	0	0	0	2	0	0	0	2	0	2	0	2	2	0	2	1	100	100	100
224	4	3	Pirikool Cement R2	1	8	0	1	0	0	0	0	0	0	0	0	0	0	0	0	0	1	0	0	1	1	0	1	0	1	1	100	0	100
227	4	3	Pirikool Cement R2	1	2	0	0	0	0	0	0	0	2	0	0	0	0	2	0	0	0	2	0	2	0	2	0	0	2	1	100	100	0
228	4	3	Pirikool Cement R2	1	3	0	0	0	1	0	0	0	1	0	0	0	0	1	0	0	0	2	0	2	0	2	1	0	2	1	100	100	50
229	4	3	Pirikool Cement R2	1	4	0	1	0	0	0	0	0	0	0	0	0	0	0	0	0	1	0	0	1	1	0	1	0	1	1	100	0	100
232	4	3	Pirikool Cement R2	1	7	0	1	0	0	0	0	0	1	0	0	0	0	1	0	0	1	1	0	2	1	1	1	0	2	1	100	50	50
234	4	3	Pirikool Cement R2	1	9	0	1	0	0	0	0	0	1	0	0	0	0	1	0	0	1	1	0	2	1	1	1	0	2	1	100	50	50
236	4	3	Pirikool Cement R2	1	2	0	0	0	0	0	0	0	2	0	0	0	0	2	0	0	0	2	0	2	0	2	0	0	2	1	100	100	0
238	4	3	Pirikool Cement R2	1	4	0	1	0	0	0	0	0	0	0	0	0	0	0	0	0	1	0	0	1	1	0	1	0	1	1	100	0	100
254	4	3	Pirikool Cement R2	1	2	0	1	0	0	0	0	0	0	0	0	0	0	0	0	0	1	0	0	1	1	0	1	0	1	1	100	0	100
260	4	3	Pirikool Cement R2	1	8	0	2	0	0	0	0	0	0	0	0	0	0	0	0	0	2	0	0	2	2	0	2	0	2	1	100	0	100
261	4	3	Pirikool Cement R2	1	9	0	1	0	0	0	0	0	0	0	0	0	0	0	0	0	1	0	0	1	1	0	1	0	1	1	100	0	100
262	4	3	Pirikool Cement R2	1	1	0	1	0	0	0	0	0	0	0	0	0	0	0	0	0	1	0	0	1	1	0	1	0	1	1	100	0	100
266	4	3	Pirikool Cement R2	1	5	0	1	0	0	0	0	0	0	0	0	0	0	0	0	0	1	0	0	1	1	0	1	0	1	1	100	0	100
267	4	3	Pirikool Cement R2	1	6	0	0	0	0	0	0	0	3	0	0	0	0	3	0	0	0	3	0	3	0	3	0	0	3	1	100	100	0
273	4	3	Pirikool Cement R2	1	3	0	1	0	0	0	0	0	0	0	0	0	0	0	0	0	1	0	0	1	1	0	1	0	1	1	100	0	100
274	4	3	Pirikool Cement R2	1	4	0	1	0	2	0	0	0	0	0	0	0	0	2	0	0	1	2	0	3	1	2	3	0	3	1	100	66.6667	100
276	4	3	Pirikool Cement R2	1	6	0	2	0	0	0	0	0	0	0	0	0	0	0	0	0	2	0	0	2	2	0	2	0	2	1	100	0	100
277	4	3	Pirikool Cement R2	1	7	3	0	0	0	0	0	0	0	0	0	0	0	0	3	0	0	0	3	0	3	0	3	0	3	1	0	0	100
278	4	3	Pirikool Cement R2	1	8	0	2	2	0	0	0	0	0	0	0	0	0	2	0	2	2	0	2	2	2	2	4	0	4	1	50	50	100
283	4	3	Pirikool Cement R2	1	4	0	1	0	0	0	0	0	0	0	0	0	0	0	0	0	1	0	0	1	1	0	1	0	1	1	100	0	100
284	4	3	Pirikool Cement R2	1	5	0	2	0	0	0	0	0	0	0	0	0	0	0	0	0	2	0	0	2	2	0	2	0	2	1	100	0	100
285	4	3	Pirikool Cement R2	1	6	0	3	0	0	0	0	0	0	0	0	0	0	0	0	0	3	0	0	3	3	0	3	0	3	1	100	0	100
286	4	3	Pirikool Cement R2	1	7	0	1	0	0	0	0	0	0	0	0	0	0	0	0	0	1	0	0	1	1	0	1	0	1	1	100	0	100
287	4	3	Pirikool Cement R2	1	8	0	3	0	1	0	0	1	0	0	0	0	0	1	0	1	3	1	1	4	3	2	4	0	5	1	80	40	80
288	4	3	Pirikool Cement R2	1	9	1	1	0	0	0	0	0	0	0	0	0	0	0	1	0	1	0	1	1	2	0	2	0	2	1	50	0	100
1	5	4	Actellic Cement R2	2	5	0	0	0	1	0	0	0	0	0	0	0	0	1	0	0	0	1	0	1	0	1	1	0	1	1	100	100	100
2	5	4	Actellic Cement R2	2	6	0	0	0	0	0	0	0	2	0	0	0	0	2	0	0	0	2	0	2	0	2	0	0	2	1	100	100	0
3	5	4	Actellic Cement R2	2	7	0	0	0	0	0	0	1	0	0	0	0	0	1	0	1	0	0	1	0	0	1	0	0	1	1	0	100	0
4	5	4	Actellic Cement R2	2	8	0	0	0	2	0	0	0	1	0	0	0	0	3	0	0	0	3	0	3	0	3	2	0	3	1	100	100	66.6667
5	5	4	Actellic Cement R2	2	9	0	0	0	2	0	0	0	0	0	0	0	0	1	0	0	0	2	0	2	0	2	2	0	2	1	100	100	100
6	5	4	Actellic Cement R2	2	1	0	0	0	0	0	0	0	1	0	0	0	0	1	0	0	0	1	0	1	0	1	0	0	1	1	100	100	0
7	5	4	Actellic Cement R2	2	2	0	0	0	1	0	0	0	1	0	0	0	0	1	0	0	0	2	0	2	0	2	1	0	2	1	100	100	50
8	5	4	Actellic Cement R2	2	3	0	0	0	4	0	0	0	0	0	0	0	0	4	0	0	0	4	0	4	0	4	4	0	4	1	100	100	100
9	5	4	Actellic Cement R2	2	4	0	0	1	1	0	0	0	2	0	0	0	0	3	0	1	0	3	1	3	0	4	2	0	4	1	75	100	50
10	5	4	Actellic Cement R2	2	5	0	0	0	3	0	0	0	0	0	0	0	0	2	0	0	0	3	0	3	0	3	3	0	3	1	100	100	100
11	5	4	Actellic Cement R2	2	6	0	0	0	2	0	0	0	3	0	0	0	0	4	0	0	0	5	0	5	0	5	2	0	5	1	100	100	40
12	5	4	Actellic Cement R2	2	7	0	0	0	1	0	0	0	0	0	0	0	0	0	0	0	0	1	0	1	0	1	1	0	1	1	100	100	100
13	5	4	Actellic Cement R2	2	8	0	1	0	4	0	0	0	2	0	0	0	0	4	0	0	1	6	0	7	1	6	5	0	7	1	100	85.7143	71.4286
14	5	4	Actellic Cement R2	2	9	0	0	0	2	0	0	0	0	0	0	0	0	0	0	0	0	2	0	2	0	2	2	0	2	1	100	100	100
15	5	4	Actellic Cement R2	2	1	0	0	0	3	0	0	0	2	0	0	0	0	4	0	0	0	5	0	5	0	5	3	0	5	1	100	100	60
16	5	4	Actellic Cement R2	2	2	0	0	1	1	0	0	0	1	0	0	0	0	1	0	1	0	2	1	2	0	3	2	0	3	1	66.6667	100	66.6667
17	5	4	Actellic Cement R2	2	3	0	0	0	4	0	0	2	4	0	0	0	0	9	0	2	0	8	2	8	0	10	4	0	10	1	80	100	40
19	5	4	Actellic Cement R2	2	5	0	0	0	1	0	0	0	4	0	0	0	0	5	0	0	0	5	0	5	0	5	1	0	5	1	100	100	20
20	5	4	Actellic Cement R2	2	6	0	0	0	8	0	0	0	8	0	0	0	0	14	0	0	0	16	0	16	0	16	8	0	16	1	100	100	50
21	5	4	Actellic Cement R2	2	7	0	0	0	6	0	0	0	3	0	0	0	0	6	0	0	0	9	0	9	0	9	6	0	9	1	100	100	66.6667
22	5	4	Actellic Cement R2	2	8	0	2	0	10	0	0	1	12	0	0	0	0	21	0	1	2	22	1	24	2	23	12	0	25	1	96	92	48
23	5	4	Actellic Cement R2	2	9	0	2	0	13	0	0	0	23	0	0	0	0	32	0	0	2	36	0	38	2	36	15	0	38	1	100	94.7368	39.4737
24	5	4	Actellic Cement R2	2	1	0	0	0	8	0	0	0	4	0	0	0	0	11	0	0	0	12	0	12	0	12	8	0	12	1	100	100	66.6667
25	5	4	Actellic Cement R2	2	2	0	0	1	5	0	0	0	6	0	0	0	0	12	0	1	0	11	1	11	0	12	6	0	12	1	91.6667	100	50
26	5	4	Actellic Cement R2	2	3	0	0	0	10	0	0	1	1	0	0	0	0	11	0	1	0	11	1	11	0	12	10	0	12	1	91.6667	100	83.3333
27	5	4	Actellic Cement R2	2	4	0	0	0	3	0	0	0	2	0	0	0	0	4	0	0	0	5	0	5	0	5	3	0	5	1	100	100	60
28	5	4	Actellic Cement R2	2	5	0	0	0	2	0	0	0	1	0	0	0	0	3	0	0	0	3	0	3	0	3	2	0	3	1	100	100	66.6667
29	5	4	Actellic Cement R2	2	6	0	1	0	6	0	0	0	1	0	0	0	0	6	0	0	1	7	0	8	1	7	7	0	8	1	100	87.5	87.5
30	5	4	Actellic Cement R2	2	7	0	0	0	5	0	0	0	8	0	0	0	0	13	0	0	0	13	0	13	0	13	5	0	13	1	100	100	38.4615
31	5	4	Actellic Cement R2	2	8	0	0	0	3	0	0	0	5	0	0	0	0	8	0	0	0	8	0	8	0	8	3	0	8	1	100	100	37.5
32	5	4	Actellic Cement R2	2	9	0	1	0	3	0	0	0	5	0	0	0	0	8	0	0	1	8	0	9	1	8	4	0	9	1	100	88.8889	44.4444
33	5	4	Actellic Cement R2	2	1	0	0	0	4	0	0	0	0	0	0	0	0	3	0	0	0	4	0	4	0	4	4	0	4	1	100	100	100
34	5	4	Actellic Cement R2	2	2	0	1	1	5	0	0	0	12	0	0	0	0	17	0	1	1	17	1	18	1	18	7	0	19	1	94.7368	94.7368	36.8421
35	5	4	Actellic Cement R2	2	3	0	0	0	5	0	0	0	5	0	0	0	0	10	0	0	0	10	0	10	0	10	5	0	10	1	100	100	50
36	5	4	Actellic Cement R2	2	4	0	1	0	9	0	0	0	3	0	0	0	0	12	0	0	1	12	0	13	1	12	10	0	13	1	100	92.3077	76.9231
37	5	4	Actellic Cement R2	2	5	0	0	0	4	0	0	0	3	0	0	0	0	4	0	0	0	7	0	7	0	7	4	0	7	1	100	100	57.1429
38	5	4	Actellic Cement R2	2	6	0	0	0	4	0	0	0	7	0	0	0	0	11	0	0	0	11	0	11	0	11	4	0	11	1	100	100	36.3636
39	5	4	Actellic Cement R2	2	7	0	0	0	5	0	0	0	2	0	0	0	0	5	0	0	0	7	0	7	0	7	5	0	7	1	100	100	71.4286
40	5	4	Actellic Cement R2	2	8	0	0	0	10	0	0	0	0	0	0	0	0	10	0	0	0	10	0	10	0	10	10	0	10	1	100	100	100
41	5	4	Actellic Cement R2	2	9	0	1	0	2	0	0	0	9	0	0	0	0	10	0	0	1	11	0	12	1	11	3	0	12	1	100	91.6667	25
42	5	4	Actellic Cement R2	2	1	0	1	0	9	0	0	0	4	0	0	0	0	12	0	0	1	13	0	14	1	13	10	0	14	1	100	92.8571	71.4286
43	5	4	Actellic Cement R2	2	2	0	0	0	8	0	0	1	5	0	0	0	0	13	0	1	0	13	1	13	0	14	8	0	14	1	92.8571	100	57.1429
44	5	4	Actellic Cement R2	2	3	0	0	0	16	0	0	0	4	0	0	0	0	20	0	0	0	20	0	20	0	20	16	0	20	1	100	100	80
45	5	4	Actellic Cement R2	2	4	0	0	1	12	0	0	0	20	0	0	0	0	32	0	1	0	32	1	32	0	33	13	0	33	1	96.9697	100	39.3939
46	5	4	Actellic Cement R2	2	5	0	0	0	6	0	0	0	4	0	0	0	0	10	0	0	0	10	0	10	0	10	6	0	10	1	100	100	60
47	5	4	Actellic Cement R2	2	6	0	0	0	24	0	0	0	9	0	0	0	0	31	0	0	0	33	0	33	0	33	24	0	33	1	100	100	72.7273
48	5	4	Actellic Cement R2	2	7	0	0	0	17	0	0	0	11	0	0	0	0	26	0	0	0	28	0	28	0	28	17	0	28	1	100	100	60.7143
49	5	4	Actellic Cement R2	2	8	2	14	2	11	0	0	0	12	0	0	0	0	12	2	2	14	23	4	37	16	25	29	0	41	1	90.2439	60.9756	70.7317
50	5	4	Actellic Cement R2	2	9	0	6	0	3	0	0	2	17	0	0	0	0	22	0	2	6	20	2	26	6	22	9	0	28	1	92.8571	78.5714	32.1429
51	5	4	Actellic Cement R2	2	1	0	3	0	17	0	0	0	25	0	0	0	0	34	0	0	3	42	0	45	3	42	20	0	45	1	100	93.3333	44.4444
52	5	4	Actellic Cement R2	2	2	0	9	0	17	0	0	0	16	0	0	0	0	24	0	0	9	33	0	42	9	33	26	0	42	1	100	78.5714	61.9048
53	5	4	Actellic Cement R2	2	3	0	1	2	16	0	0	0	7	0	0	0	0	25	0	2	1	23	2	24	1	25	19	0	26	1	92.3077	96.1538	73.0769
54	5	4	Actellic Cement R2	2	4	0	6	0	14	0	0	0	2	0	0	0	0	13	0	0	6	16	0	22	6	16	20	0	22	1	100	72.7273	90.9091
67	5	4	Actellic Cement R2	2	5	0	0	1	8	0	0	0	0	0	0	0	0	4	0	1	0	8	1	8	0	9	9	0	9	1	88.8889	100	100
68	5	4	Actellic Cement R2	2	6	0	0	0	23	0	0	0	21	0	0	0	0	39	0	0	0	44	0	44	0	44	23	0	44	1	100	100	52.2727
69	5	4	Actellic Cement R2	2	7	0	4	1	11	0	0	4	12	0	0	0	0	26	0	5	4	23	5	27	4	28	16	0	32	1	84.375	87.5	50
70	5	4	Actellic Cement R2	2	8	0	0	0	5	0	0	0	25	0	0	0	0	30	0	0	0	30	0	30	0	30	5	0	30	1	100	100	16.6667
71	5	4	Actellic Cement R2	2	9	0	1	0	11	0	0	0	8	0	0	0	0	12	0	0	1	19	0	20	1	19	12	0	20	1	100	95	60
72	5	4	Actellic Cement R2	2	1	4	1	5	18	0	0	2	9	0	0	0	0	29	4	7	1	27	11	28	5	34	28	0	39	1	71.7949	87.1795	71.7949
73	5	4	Actellic Cement R2	2	2	0	3	0	12	0	0	3	58	0	0	0	0	71	0	3	3	70	3	73	3	73	15	0	76	1	96.0526	96.0526	19.7368
74	5	4	Actellic Cement R2	2	3	0	0	0	9	0	0	0	7	0	0	0	0	15	0	0	0	16	0	16	0	16	9	0	16	1	100	100	56.25
75	5	4	Actellic Cement R2	2	4	1	6	0	1	0	0	2	20	0	0	0	0	22	1	2	6	21	3	27	7	23	8	0	30	1	90	76.6667	26.6667
76	5	4	Actellic Cement R2	2	5	0	2	0	6	0	0	0	1	0	0	0	0	1	0	0	2	7	0	9	2	7	8	0	9	1	100	77.7778	88.8889
77	5	4	Actellic Cement R2	2	6	0	19	1	5	0	0	1	11	0	0	0	0	15	0	2	19	16	2	35	19	18	25	0	37	1	94.5946	48.6486	67.5676
78	5	4	Actellic Cement R2	2	7	0	5	0	12	0	0	0	15	0	0	0	0	23	0	0	5	27	0	32	5	27	17	0	32	1	100	84.375	53.125
79	5	4	Actellic Cement R2	2	8	0	0	0	5	0	0	0	3	0	0	0	0	6	0	0	0	8	0	8	0	8	5	0	8	1	100	100	62.5
80	5	4	Actellic Cement R2	2	9	0	13	0	2	0	0	1	3	0	0	0	0	4	0	1	13	5	1	18	13	6	15	0	19	1	94.7368	31.5789	78.9474
81	5	4	Actellic Cement R2	2	1	0	1	0	4	0	0	0	14	0	0	0	0	15	0	0	1	18	0	19	1	18	5	0	19	1	100	94.7368	26.3158
82	5	4	Actellic Cement R2	2	2	0	1	0	1	0	0	0	11	0	0	0	0	12	0	0	1	12	0	13	1	12	2	0	13	1	100	92.3077	15.3846
83	5	4	Actellic Cement R2	2	3	0	2	0	3	0	0	0	1	0	0	0	0	4	0	0	2	4	0	6	2	4	5	0	6	1	100	66.6667	83.3333
84	5	4	Actellic Cement R2	2	4	0	4	0	0	0	0	1	5	0	0	0	0	6	0	1	4	5	1	9	4	6	4	0	10	1	90	60	40
85	5	4	Actellic Cement R2	2	5	0	2	0	2	0	0	0	2	0	0	0	0	2	0	0	2	4	0	6	2	4	4	0	6	1	100	66.6667	66.6667
86	5	4	Actellic Cement R2	2	6	0	3	0	0	0	0	0	3	0	0	0	0	3	0	0	3	3	0	6	3	3	3	0	6	1	100	50	50
87	5	4	Actellic Cement R2	2	7	0	2	0	1	0	0	0	4	0	0	0	0	4	0	0	2	5	0	7	2	5	3	0	7	1	100	71.4286	42.8571
88	5	4	Actellic Cement R2	2	8	0	0	0	4	0	0	0	2	0	0	0	0	6	0	0	0	6	0	6	0	6	4	0	6	1	100	100	66.6667
89	5	4	Actellic Cement R2	2	9	0	1	0	11	0	0	0	11	0	0	0	0	18	0	0	1	22	0	23	1	22	12	0	23	1	100	95.6522	52.1739
90	5	4	Actellic Cement R2	2	1	0	3	0	3	0	0	0	5	0	0	0	0	8	0	0	3	8	0	11	3	8	6	0	11	1	100	72.7273	54.5455
91	5	4	Actellic Cement R2	2	2	1	0	0	3	0	0	0	2	0	0	0	0	4	1	0	0	5	1	5	1	5	4	0	6	1	83.3333	83.3333	66.6667
92	5	4	Actellic Cement R2	2	3	0	1	0	3	0	0	1	6	0	0	0	0	10	0	1	1	9	1	10	1	10	4	0	11	1	90.9091	90.9091	36.3636
93	5	4	Actellic Cement R2	2	4	0	9	0	3	0	0	2	24	0	0	0	0	26	0	2	9	27	2	36	9	29	12	0	38	1	94.7368	76.3158	31.5789
94	5	4	Actellic Cement R2	2	5	0	6	0	2	0	0	2	18	0	0	0	0	20	0	2	6	20	2	26	6	22	8	0	28	1	92.8571	78.5714	28.5714
95	5	4	Actellic Cement R2	2	6	0	3	0	1	0	0	0	4	0	0	0	0	5	0	0	3	5	0	8	3	5	4	0	8	1	100	62.5	50
96	5	4	Actellic Cement R2	2	7	0	1	0	7	0	0	0	8	0	0	0	0	15	0	0	1	15	0	16	1	15	8	0	16	1	100	93.75	50
97	5	4	Actellic Cement R2	2	8	0	0	0	8	0	0	0	0	0	0	0	0	8	0	0	0	8	0	8	0	8	8	0	8	1	100	100	100
98	5	4	Actellic Cement R2	2	9	0	4	0	5	0	0	0	0	0	0	0	0	4	0	0	4	5	0	9	4	5	9	0	9	1	100	55.5556	100
99	5	4	Actellic Cement R2	2	1	0	2	0	5	0	0	0	9	0	0	0	0	13	0	0	2	14	0	16	2	14	7	0	16	1	100	87.5	43.75
100	5	4	Actellic Cement R2	2	2	0	2	2	6	0	0	0	4	0	0	0	0	11	0	2	2	10	2	12	2	12	10	0	14	1	85.7143	85.7143	71.4286
101	5	4	Actellic Cement R2	2	3	0	2	0	1	0	0	0	10	0	0	0	0	10	0	0	2	11	0	13	2	11	3	0	13	1	100	84.6154	23.0769
102	5	4	Actellic Cement R2	2	4	3	2	0	2	0	0	0	5	0	0	0	0	6	3	0	2	7	3	9	5	7	7	0	12	1	75	58.3333	58.3333
103	5	4	Actellic Cement R2	2	5	0	0	0	6	0	0	0	0	0	0	0	0	2	0	0	0	6	0	6	0	6	6	0	6	1	100	100	100
104	5	4	Actellic Cement R2	2	6	0	2	0	8	0	0	0	0	0	0	0	0	5	0	0	2	8	0	10	2	8	10	0	10	1	100	80	100
105	5	4	Actellic Cement R2	2	7	0	4	0	0	0	0	0	3	0	0	0	0	3	0	0	4	3	0	7	4	3	4	0	7	1	100	42.8571	57.1429
106	5	4	Actellic Cement R2	2	8	0	1	0	9	0	0	0	3	0	0	0	0	11	0	0	1	12	0	13	1	12	10	0	13	1	100	92.3077	76.9231
107	5	4	Actellic Cement R2	2	9	0	4	0	4	0	0	0	5	0	0	0	0	5	0	0	4	9	0	13	4	9	8	0	13	1	100	69.2308	61.5385
108	5	4	Actellic Cement R2	2	1	0	3	0	6	0	0	0	4	0	0	0	0	8	0	0	3	10	0	13	3	10	9	0	13	1	100	76.9231	69.2308
109	5	4	Actellic Cement R2	2	2	0	3	0	2	0	0	0	0	0	0	0	0	2	0	0	3	2	0	5	3	2	5	0	5	1	100	40	100
110	5	4	Actellic Cement R2	2	3	0	2	0	1	0	0	0	2	0	0	0	0	2	0	0	2	3	0	5	2	3	3	0	5	1	100	60	60
111	5	4	Actellic Cement R2	2	4	0	1	0	6	0	0	0	0	0	0	0	0	3	0	0	1	6	0	7	1	6	7	0	7	1	100	85.7143	100
112	5	4	Actellic Cement R2	2	5	0	1	0	1	0	0	0	1	0	0	0	0	1	0	0	1	2	0	3	1	2	2	0	3	1	100	66.6667	66.6667
113	5	4	Actellic Cement R2	2	6	0	2	0	3	0	0	0	0	0	0	0	0	1	0	0	2	3	0	5	2	3	5	0	5	1	100	60	100
114	5	4	Actellic Cement R2	2	7	0	0	0	2	0	0	1	3	0	0	0	0	4	0	1	0	5	1	5	0	6	2	0	6	1	83.3333	100	33.3333
115	5	4	Actellic Cement R2	2	8	0	0	0	3	0	0	0	4	0	0	0	0	4	0	0	0	7	0	7	0	7	3	0	7	1	100	100	42.8571
116	5	4	Actellic Cement R2	2	9	0	0	0	1	0	0	0	5	0	0	0	0	5	0	0	0	6	0	6	0	6	1	0	6	1	100	100	16.6667
117	5	4	Actellic Cement R2	2	1	0	1	0	0	0	0	0	0	0	0	0	0	0	0	0	1	0	0	1	1	0	1	0	1	1	100	0	100
118	5	4	Actellic Cement R2	2	2	0	1	0	4	0	0	0	4	0	0	0	0	7	0	0	1	8	0	9	1	8	5	0	9	1	100	88.8889	55.5556
119	5	4	Actellic Cement R2	2	3	0	2	0	3	0	0	0	3	0	0	0	0	5	0	0	2	6	0	8	2	6	5	0	8	1	100	75	62.5
120	5	4	Actellic Cement R2	2	4	1	2	1	3	0	0	0	6	0	0	0	0	8	1	1	2	9	2	11	3	10	7	0	13	1	84.6154	76.9231	53.8462
121	5	4	Actellic Cement R2	2	5	1	0	0	2	0	0	0	0	0	0	0	0	2	1	0	0	2	1	2	1	2	3	0	3	1	66.6667	66.6667	100
122	5	4	Actellic Cement R2	2	6	0	4	0	2	0	0	0	4	0	0	0	0	6	0	0	4	6	0	10	4	6	6	0	10	1	100	60	60
123	5	4	Actellic Cement R2	2	7	0	1	0	3	0	0	0	3	0	0	0	0	6	0	0	1	6	0	7	1	6	4	0	7	1	100	85.7143	57.1429
124	5	4	Actellic Cement R2	2	8	0	0	0	1	0	0	0	1	0	0	0	0	2	0	0	0	2	0	2	0	2	1	0	2	1	100	100	50
125	5	4	Actellic Cement R2	2	9	0	1	0	0	0	0	0	0	0	0	0	0	0	0	0	1	0	0	1	1	0	1	0	1	1	100	0	100
126	5	4	Actellic Cement R2	2	1	0	1	0	0	0	0	0	2	0	0	0	0	2	0	0	1	2	0	3	1	2	1	0	3	1	100	66.6667	33.3333
127	5	4	Actellic Cement R2	2	2	0	0	0	3	0	0	0	0	0	0	0	0	1	0	0	0	3	0	3	0	3	3	0	3	1	100	100	100
128	5	4	Actellic Cement R2	2	3	0	3	0	2	0	0	0	1	0	0	0	0	2	0	0	3	3	0	6	3	3	5	0	6	1	100	50	83.3333
129	5	4	Actellic Cement R2	2	4	0	8	0	2	0	0	0	0	0	0	0	0	2	0	0	8	2	0	10	8	2	10	0	10	1	100	20	100
130	5	4	Actellic Cement R2	2	5	0	5	0	2	0	0	0	0	0	0	0	0	2	0	0	5	2	0	7	5	2	7	0	7	1	100	28.5714	100
131	5	4	Actellic Cement R2	2	6	0	3	0	3	0	0	0	6	0	0	0	0	8	0	0	3	9	0	12	3	9	6	0	12	1	100	75	50
132	5	4	Actellic Cement R2	2	7	0	7	0	1	0	0	0	4	0	0	0	0	5	0	0	7	5	0	12	7	5	8	0	12	1	100	41.6667	66.6667
133	5	4	Actellic Cement R2	2	8	0	-2	2	2	0	0	0	1	0	0	0	0	3	0	2	-2	3	2	1	-2	5	2	0	3	1	33.3333	166.667	66.6667
134	5	4	Actellic Cement R2	2	9	0	5	0	1	0	0	0	1	0	0	0	0	2	0	0	5	2	0	7	5	2	6	0	7	1	100	28.5714	85.7143
135	5	4	Actellic Cement R2	2	1	0	5	0	2	0	0	0	0	0	0	0	0	2	0	0	5	2	0	7	5	2	7	0	7	1	100	28.5714	100
136	5	4	Actellic Cement R2	2	2	0	2	0	7	0	0	0	0	0	0	0	0	0	0	0	2	7	0	9	2	7	9	0	9	1	100	77.7778	100
137	5	4	Actellic Cement R2	2	3	0	0	0	10	0	0	0	6	0	0	0	0	16	0	0	0	16	0	16	0	16	10	0	16	1	100	100	62.5
138	5	4	Actellic Cement R2	2	4	0	5	0	7	0	0	0	13	0	0	0	0	13	0	0	5	20	0	25	5	20	12	0	25	1	100	80	48
139	5	4	Actellic Cement R2	2	5	0	4	0	2	0	0	0	0	0	0	0	0	2	0	0	4	2	0	6	4	2	6	0	6	1	100	33.3333	100
140	5	4	Actellic Cement R2	2	6	0	5	0	0	0	0	0	1	0	0	0	0	1	0	0	5	1	0	6	5	1	5	0	6	1	100	16.6667	83.3333
141	5	4	Actellic Cement R2	2	7	0	13	0	5	0	0	0	4	0	0	0	0	5	0	0	13	9	0	22	13	9	18	0	22	1	100	40.9091	81.8182
142	5	4	Actellic Cement R2	2	8	0	1	0	3	0	0	0	5	0	0	0	0	7	0	0	1	8	0	9	1	8	4	0	9	1	100	88.8889	44.4444
143	5	4	Actellic Cement R2	2	9	0	5	0	1	0	0	0	0	0	0	0	0	1	0	0	5	1	0	6	5	1	6	0	6	1	100	16.6667	100
144	5	4	Actellic Cement R2	2	1	0	4	0	2	0	0	0	2	0	0	0	0	2	0	0	4	4	0	8	4	4	6	0	8	1	100	50	75
145	5	4	Actellic Cement R2	2	2	0	6	0	0	0	0	0	0	0	0	0	0	0	0	0	6	0	0	6	6	0	6	0	6	1	100	0	100
146	5	4	Actellic Cement R2	2	3	0	6	0	1	0	0	0	3	0	0	0	0	3	0	0	6	4	0	10	6	4	7	0	10	1	100	40	70
147	5	4	Actellic Cement R2	2	4	0	18	1	1	0	0	0	5	0	0	0	0	5	0	1	18	6	1	24	18	7	20	0	25	1	96	28	80
148	5	4	Actellic Cement R2	2	5	0	7	0	1	0	0	0	0	0	0	0	0	0	0	0	7	1	0	8	7	1	8	0	8	1	100	12.5	100
149	5	4	Actellic Cement R2	2	6	0	2	0	1	0	0	0	0	0	0	0	0	0	0	0	2	1	0	3	2	1	3	0	3	1	100	33.3333	100
150	5	4	Actellic Cement R2	2	7	0	7	0	0	0	0	0	4	0	0	0	0	4	0	0	7	4	0	11	7	4	7	0	11	1	100	36.3636	63.6364
151	5	4	Actellic Cement R2	2	8	0	3	0	0	0	0	0	4	0	0	0	0	4	0	0	3	4	0	7	3	4	3	0	7	1	100	57.1429	42.8571
152	5	4	Actellic Cement R2	2	9	0	3	0	0	0	0	0	0	0	0	0	0	0	0	0	3	0	0	3	3	0	3	0	3	1	100	0	100
153	5	4	Actellic Cement R2	2	1	0	5	0	0	0	0	0	3	0	0	0	0	3	0	0	5	3	0	8	5	3	5	0	8	1	100	37.5	62.5
154	5	4	Actellic Cement R2	2	2	0	4	0	0	0	0	0	4	0	0	0	0	4	0	0	4	4	0	8	4	4	4	0	8	1	100	50	50
155	5	4	Actellic Cement R2	2	3	0	3	0	3	0	0	0	3	0	0	0	0	3	0	0	3	6	0	9	3	6	6	0	9	1	100	66.6667	66.6667
156	5	4	Actellic Cement R2	2	4	0	7	0	0	0	0	0	4	0	0	0	0	4	0	0	7	4	0	11	7	4	7	0	11	1	100	36.3636	63.6364
157	5	4	Actellic Cement R2	2	5	0	1	0	0	0	0	0	0	0	0	0	0	0	0	0	1	0	0	1	1	0	1	0	1	1	100	0	100
158	5	4	Actellic Cement R2	2	6	0	10	0	0	0	0	0	0	0	0	0	0	0	0	0	10	0	0	10	10	0	10	0	10	1	100	0	100
159	5	4	Actellic Cement R2	2	7	0	9	2	0	0	0	0	3	0	0	0	0	3	0	2	9	3	2	12	9	5	11	0	14	1	85.7143	35.7143	78.5714
160	5	4	Actellic Cement R2	2	8	0	8	0	2	0	0	0	1	0	0	0	0	1	0	0	8	3	0	11	8	3	10	0	11	1	100	27.2727	90.9091
161	5	4	Actellic Cement R2	2	9	0	8	0	0	0	0	0	3	0	0	0	0	3	0	0	8	3	0	11	8	3	8	0	11	1	100	27.2727	72.7273
162	5	4	Actellic Cement R2	2	1	0	4	0	0	0	0	0	3	0	0	0	0	3	0	0	4	3	0	7	4	3	4	0	7	1	100	42.8571	57.1429
163	5	4	Actellic Cement R2	2	2	0	4	0	1	0	0	0	0	0	0	0	0	0	0	0	4	1	0	5	4	1	5	0	5	1	100	20	100
164	5	4	Actellic Cement R2	2	3	0	5	0	1	0	0	0	0	0	0	0	0	0	0	0	5	1	0	6	5	1	6	0	6	1	100	16.6667	100
165	5	4	Actellic Cement R2	2	4	0	8	0	2	0	0	0	8	0	0	0	0	8	0	0	8	10	0	18	8	10	10	0	18	1	100	55.5556	55.5556
166	5	4	Actellic Cement R2	2	5	0	5	0	0	0	0	0	0	0	0	0	0	0	0	0	5	0	0	5	5	0	5	0	5	1	100	0	100
167	5	4	Actellic Cement R2	2	6	0	5	0	2	0	0	0	4	0	0	0	0	4	0	0	5	6	0	11	5	6	7	0	11	1	100	54.5455	63.6364
168	5	4	Actellic Cement R2	2	7	0	14	0	0	0	0	0	3	0	0	0	0	3	0	0	14	3	0	17	14	3	14	0	17	1	100	17.6471	82.3529
169	5	4	Actellic Cement R2	2	8	0	4	0	2	0	0	0	10	0	0	0	0	11	0	0	4	12	0	16	4	12	6	0	16	1	100	75	37.5
170	5	4	Actellic Cement R2	2	9	0	5	0	11	0	0	0	4	0	0	0	0	13	0	0	5	15	0	20	5	15	16	0	20	1	100	75	80
171	5	4	Actellic Cement R2	2	1	0	6	0	0	0	0	0	0	0	0	0	0	0	0	0	6	0	0	6	6	0	6	0	6	1	100	0	100
172	5	4	Actellic Cement R2	2	2	0	5	0	11	0	0	0	3	0	0	0	0	14	0	0	5	14	0	19	5	14	16	0	19	1	100	73.6842	84.2105
173	5	4	Actellic Cement R2	2	3	0	6	0	4	0	0	0	6	0	0	0	0	9	0	0	6	10	0	16	6	10	10	0	16	1	100	62.5	62.5
174	5	4	Actellic Cement R2	2	4	0	18	0	2	0	0	0	11	0	0	0	0	12	0	0	18	13	0	31	18	13	20	0	31	1	100	41.9355	64.5161
175	5	4	Actellic Cement R2	2	5	0	3	0	0	0	0	0	0	0	0	0	0	0	0	0	3	0	0	3	3	0	3	0	3	1	100	0	100
176	5	4	Actellic Cement R2	2	6	0	15	0	10	0	0	0	3	0	0	0	0	11	0	0	15	13	0	28	15	13	25	0	28	1	100	46.4286	89.2857
177	5	4	Actellic Cement R2	2	7	0	16	0	4	0	0	0	3	0	0	0	0	7	0	0	16	7	0	23	16	7	20	0	23	1	100	30.4348	86.9565
178	5	4	Actellic Cement R2	2	8	0	5	0	4	0	0	0	3	0	0	0	0	7	0	0	5	7	0	12	5	7	9	0	12	1	100	58.3333	75
179	5	4	Actellic Cement R2	2	9	0	9	0	0	0	0	1	2	0	0	0	0	3	0	1	9	2	1	11	9	3	9	0	12	1	91.6667	25	75
180	5	4	Actellic Cement R2	2	1	0	4	0	0	0	0	0	0	0	0	0	0	0	0	0	4	0	0	4	4	0	4	0	4	1	100	0	100
181	5	4	Actellic Cement R2	2	2	0	3	0	1	0	0	0	4	0	0	0	0	5	0	0	3	5	0	8	3	5	4	0	8	1	100	62.5	50
182	5	4	Actellic Cement R2	2	3	0	4	0	3	0	0	0	0	0	0	0	0	3	0	0	4	3	0	7	4	3	7	0	7	1	100	42.8571	100
183	5	4	Actellic Cement R2	2	4	0	11	0	4	0	0	0	9	0	0	0	0	11	0	0	11	13	0	24	11	13	15	0	24	1	100	54.1667	62.5
184	5	4	Actellic Cement R2	2	5	1	3	0	1	0	0	0	0	0	0	0	0	1	1	0	3	1	1	4	4	1	5	0	5	1	80	20	100
185	5	4	Actellic Cement R2	2	6	0	7	0	0	0	0	0	2	0	0	0	0	2	0	0	7	2	0	9	7	2	7	0	9	1	100	22.2222	77.7778
186	5	4	Actellic Cement R2	2	7	0	8	0	1	0	0	0	6	0	0	0	0	7	0	0	8	7	0	15	8	7	9	0	15	1	100	46.6667	60
187	5	4	Actellic Cement R2	2	8	0	3	0	0	0	0	0	0	0	0	0	0	0	0	0	3	0	0	3	3	0	3	0	3	1	100	0	100
188	5	4	Actellic Cement R2	2	9	0	2	0	4	0	0	0	6	0	0	0	0	6	0	0	2	10	0	12	2	10	6	0	12	1	100	83.3333	50
189	5	4	Actellic Cement R2	2	1	0	4	0	1	0	0	0	7	0	0	0	0	8	0	0	4	8	0	12	4	8	5	0	12	1	100	66.6667	41.6667
190	5	4	Actellic Cement R2	2	2	0	7	0	1	0	0	0	5	0	0	0	0	6	0	0	7	6	0	13	7	6	8	0	13	1	100	46.1538	61.5385
191	5	4	Actellic Cement R2	2	3	0	0	0	3	0	0	0	12	0	0	0	0	14	0	0	0	15	0	15	0	15	3	0	15	1	100	100	20
192	5	4	Actellic Cement R2	2	4	0	7	0	2	0	0	0	0	0	0	0	0	1	0	0	7	2	0	9	7	2	9	0	9	1	100	22.2222	100
193	5	4	Actellic Cement R2	2	5	0	1	0	3	0	0	0	0	0	0	0	0	3	0	0	1	3	0	4	1	3	4	0	4	1	100	75	100
194	5	4	Actellic Cement R2	2	6	0	1	0	2	0	0	0	9	0	0	0	0	11	0	0	1	11	0	12	1	11	3	0	12	1	100	91.6667	25
195	5	4	Actellic Cement R2	2	7	0	3	0	0	0	0	0	5	0	0	0	0	5	0	0	3	5	0	8	3	5	3	0	8	1	100	62.5	37.5
196	5	4	Actellic Cement R2	2	8	0	0	0	1	0	0	0	2	0	0	0	0	2	0	0	0	3	0	3	0	3	1	0	3	1	100	100	33.3333
197	5	4	Actellic Cement R2	2	9	0	3	0	1	0	0	0	3	0	0	0	0	4	0	0	3	4	0	7	3	4	4	0	7	1	100	57.1429	57.1429
198	5	4	Actellic Cement R2	2	1	0	0	0	2	0	0	0	5	0	0	0	0	7	0	0	0	7	0	7	0	7	2	0	7	1	100	100	28.5714
199	5	4	Actellic Cement R2	2	2	0	2	0	0	0	0	0	7	0	0	0	0	7	0	0	2	7	0	9	2	7	2	0	9	1	100	77.7778	22.2222
200	5	4	Actellic Cement R2	2	3	0	1	0	4	0	0	0	4	0	0	0	0	7	0	0	1	8	0	9	1	8	5	0	9	1	100	88.8889	55.5556
201	5	4	Actellic Cement R2	2	4	3	0	0	3	0	0	0	5	0	0	0	0	8	3	0	0	8	3	8	3	8	6	0	11	1	72.7273	72.7273	54.5455
202	5	4	Actellic Cement R2	2	5	0	4	0	0	0	0	0	0	0	0	0	0	0	0	0	4	0	0	4	4	0	4	0	4	1	100	0	100
203	5	4	Actellic Cement R2	2	6	0	3	0	1	0	0	0	2	0	0	0	0	3	0	0	3	3	0	6	3	3	4	0	6	1	100	50	66.6667
204	5	4	Actellic Cement R2	2	7	0	4	0	1	0	0	0	7	0	0	0	0	8	0	0	4	8	0	12	4	8	5	0	12	1	100	66.6667	41.6667
205	5	4	Actellic Cement R2	2	8	0	1	0	1	0	0	0	3	0	0	0	0	4	0	0	1	4	0	5	1	4	2	0	5	1	100	80	40
206	5	4	Actellic Cement R2	2	9	0	0	0	0	0	0	0	4	0	0	0	0	4	0	0	0	4	0	4	0	4	0	0	4	1	100	100	0
207	5	4	Actellic Cement R2	2	1	0	2	0	0	0	0	0	1	0	0	0	0	1	0	0	2	1	0	3	2	1	2	0	3	1	100	33.3333	66.6667
208	5	4	Actellic Cement R2	2	2	0	3	0	2	0	0	0	2	0	0	0	0	3	0	0	3	4	0	7	3	4	5	0	7	1	100	57.1429	71.4286
209	5	4	Actellic Cement R2	2	3	0	2	0	2	0	0	0	3	0	0	0	0	4	0	0	2	5	0	7	2	5	4	0	7	1	100	71.4286	57.1429
210	5	4	Actellic Cement R2	2	4	1	6	0	0	0	0	0	3	0	0	0	0	3	1	0	6	3	1	9	7	3	7	0	10	1	90	30	70
211	5	4	Actellic Cement R2	2	5	0	1	0	0	0	0	0	0	0	0	0	0	0	0	0	1	0	0	1	1	0	1	0	1	1	100	0	100
212	5	4	Actellic Cement R2	2	6	0	4	0	3	0	0	0	0	0	0	0	0	3	0	0	4	3	0	7	4	3	7	0	7	1	100	42.8571	100
213	5	4	Actellic Cement R2	2	7	0	3	0	1	0	0	0	0	0	0	0	0	1	0	0	3	1	0	4	3	1	4	0	4	1	100	25	100
214	5	4	Actellic Cement R2	2	8	0	2	0	2	0	0	0	0	0	0	0	0	2	0	0	2	2	0	4	2	2	4	0	4	1	100	50	100
215	5	4	Actellic Cement R2	2	9	0	2	0	2	0	0	0	0	0	0	0	0	2	0	0	2	2	0	4	2	2	4	0	4	1	100	50	100
216	5	4	Actellic Cement R2	2	1	0	2	0	1	0	0	0	1	0	0	0	0	2	0	0	2	2	0	4	2	2	3	0	4	1	100	50	75
217	5	4	Actellic Cement R2	2	2	0	3	0	0	0	0	0	0	0	0	0	0	0	0	0	3	0	0	3	3	0	3	0	3	1	100	0	100
218	5	4	Actellic Cement R2	2	3	0	0	0	0	0	0	0	3	0	0	0	0	3	0	0	0	3	0	3	0	3	0	0	3	1	100	100	0
219	5	4	Actellic Cement R2	2	4	0	1	0	1	0	0	0	2	0	0	0	0	3	0	0	1	3	0	4	1	3	2	0	4	1	100	75	50
221	5	4	Actellic Cement R2	2	6	0	2	0	0	0	0	0	0	0	0	0	0	0	0	0	2	0	0	2	2	0	2	0	2	1	100	0	100
222	5	4	Actellic Cement R2	2	7	0	0	0	0	0	0	0	1	0	0	0	0	1	0	0	0	1	0	1	0	1	0	0	1	1	100	100	0
223	5	4	Actellic Cement R2	2	8	0	0	0	0	0	0	0	1	0	0	0	0	1	0	0	0	1	0	1	0	1	0	0	1	1	100	100	0
226	5	4	Actellic Cement R2	2	2	0	2	0	0	0	0	0	0	0	0	0	0	0	0	0	2	0	0	2	2	0	2	0	2	1	100	0	100
227	5	4	Actellic Cement R2	2	3	0	0	0	0	0	0	0	2	0	0	0	0	2	0	0	0	2	0	2	0	2	0	0	2	1	100	100	0
228	5	4	Actellic Cement R2	2	4	1	0	0	0	0	0	0	5	0	0	0	0	5	1	0	0	5	1	5	1	5	1	0	6	1	83.3333	83.3333	16.6667
232	5	4	Actellic Cement R2	2	8	0	0	0	0	0	0	0	1	0	0	0	0	1	0	0	0	1	0	1	0	1	0	0	1	1	100	100	0
233	5	4	Actellic Cement R2	2	9	0	0	0	0	0	0	0	2	0	0	0	0	2	0	0	0	2	0	2	0	2	0	0	2	1	100	100	0
237	5	4	Actellic Cement R2	2	4	0	1	0	0	0	0	0	1	0	0	0	0	1	0	0	1	1	0	2	1	1	1	0	2	1	100	50	50
238	5	4	Actellic Cement R2	2	5	0	2	0	0	0	0	0	0	0	0	0	0	0	0	0	2	0	0	2	2	0	2	0	2	1	100	0	100
240	5	4	Actellic Cement R2	2	7	0	0	0	0	0	0	0	2	0	0	0	0	2	0	0	0	2	0	2	0	2	0	0	2	1	100	100	0
253	5	4	Actellic Cement R2	2	2	0	3	0	0	0	0	0	1	0	0	0	0	1	0	0	3	1	0	4	3	1	3	0	4	1	100	25	75
255	5	4	Actellic Cement R2	2	4	0	0	0	0	0	0	0	4	0	0	0	0	4	0	0	0	4	0	4	0	4	0	0	4	1	100	100	0
256	5	4	Actellic Cement R2	2	5	0	1	0	0	0	0	0	1	0	0	0	0	1	0	0	1	1	0	2	1	1	1	0	2	1	100	50	50
257	5	4	Actellic Cement R2	2	6	0	0	0	0	0	0	0	2	0	0	0	0	2	0	0	0	2	0	2	0	2	0	0	2	1	100	100	0
261	5	4	Actellic Cement R2	2	1	0	1	0	0	0	0	0	0	0	0	0	0	0	0	0	1	0	0	1	1	0	1	0	1	1	100	0	100
262	5	4	Actellic Cement R2	2	2	0	1	0	0	0	0	0	0	0	0	0	0	0	0	0	1	0	0	1	1	0	1	0	1	1	100	0	100
263	5	4	Actellic Cement R2	2	3	0	2	0	0	0	0	0	0	0	0	0	0	0	0	0	2	0	0	2	2	0	2	0	2	1	100	0	100
265	5	4	Actellic Cement R2	2	5	0	2	0	0	0	0	0	0	0	0	0	0	0	0	0	2	0	0	2	2	0	2	0	2	1	100	0	100
266	5	4	Actellic Cement R2	2	6	0	3	0	1	0	0	0	0	0	0	0	0	0	0	0	3	1	0	4	3	1	4	0	4	1	100	25	100
268	5	4	Actellic Cement R2	2	8	0	0	0	0	0	0	0	1	0	0	0	0	1	0	0	0	1	0	1	0	1	0	0	1	1	100	100	0
271	5	4	Actellic Cement R2	2	2	0	1	0	0	0	0	0	0	0	0	0	0	0	0	0	1	0	0	1	1	0	1	0	1	1	100	0	100
273	5	4	Actellic Cement R2	2	4	0	1	0	1	0	0	0	0	0	0	0	0	1	0	0	1	1	0	2	1	1	2	0	2	1	100	50	100
274	5	4	Actellic Cement R2	2	5	1	4	0	0	0	0	0	0	0	0	0	0	0	1	0	4	0	1	4	5	0	5	0	5	1	80	0	100
275	5	4	Actellic Cement R2	2	6	0	2	0	0	0	0	0	0	0	0	0	0	0	0	0	2	0	0	2	2	0	2	0	2	1	100	0	100
276	5	4	Actellic Cement R2	2	7	0	1	0	0	0	0	0	0	0	0	0	0	0	0	0	1	0	0	1	1	0	1	0	1	1	100	0	100
277	5	4	Actellic Cement R2	2	8	0	5	0	0	0	0	0	0	0	0	0	0	0	0	0	5	0	0	5	5	0	5	0	5	1	100	0	100
278	5	4	Actellic Cement R2	2	9	0	1	0	0	0	0	0	0	0	0	0	0	0	0	0	1	0	0	1	1	0	1	0	1	1	100	0	100
279	5	4	Actellic Cement R2	2	1	2	1	0	0	0	0	0	0	0	0	0	0	0	2	0	1	0	2	1	3	0	3	0	3	1	33.3333	0	100
280	5	4	Actellic Cement R2	2	2	0	2	0	0	0	0	0	0	0	0	0	0	0	0	0	2	0	0	2	2	0	2	0	2	1	100	0	100
283	5	4	Actellic Cement R2	2	5	0	1	0	0	0	0	0	0	0	0	0	0	0	0	0	1	0	0	1	1	0	1	0	1	1	100	0	100
284	5	4	Actellic Cement R2	2	6	2	5	0	0	0	0	0	0	0	0	0	0	0	2	0	5	0	2	5	7	0	7	0	7	1	71.4286	0	100
286	5	4	Actellic Cement R2	2	8	0	8	0	0	0	0	0	0	0	0	0	0	0	0	0	8	0	0	8	8	0	8	0	8	1	100	0	100
287	5	4	Actellic Cement R2	2	9	0	3	0	0	0	0	0	0	0	0	0	0	0	0	0	3	0	0	3	3	0	3	0	3	1	100	0	100
288	5	4	Actellic Cement R2	2	1	1	1	0	0	0	0	0	0	0	0	0	0	0	1	0	1	0	1	1	2	0	2	0	2	1	50	0	100
3	6	5	Pirikool Mud R1	3	8	0	0	0	1	0	0	0	1	0	0	0	0	1	0	0	0	2	0	2	0	2	1	0	2	1	100	100	50
4	6	5	Pirikool Mud R1	3	9	0	0	0	3	0	0	1	4	0	0	0	0	7	0	1	0	7	1	7	0	8	3	0	8	1	87.5	100	37.5
6	6	5	Pirikool Mud R1	3	2	0	0	0	2	0	0	0	2	0	0	0	0	3	0	0	0	4	0	4	0	4	2	0	4	1	100	100	50
7	6	5	Pirikool Mud R1	3	3	0	0	0	2	0	0	0	0	0	0	0	0	2	0	0	0	2	0	2	0	2	2	0	2	1	100	100	100
8	6	5	Pirikool Mud R1	3	4	0	1	0	2	0	0	0	0	0	0	0	0	1	0	0	1	2	0	3	1	2	3	0	3	1	100	66.6667	100
9	6	5	Pirikool Mud R1	3	5	0	0	0	3	0	0	0	2	0	0	0	0	5	0	0	0	5	0	5	0	5	3	0	5	1	100	100	60
10	6	5	Pirikool Mud R1	3	6	0	0	1	3	0	0	0	1	0	0	0	0	2	0	1	0	4	1	4	0	5	4	0	5	1	80	100	80
11	6	5	Pirikool Mud R1	3	7	0	0	0	4	0	0	0	1	0	0	0	0	5	0	0	0	5	0	5	0	5	4	0	5	1	100	100	80
12	6	5	Pirikool Mud R1	3	8	0	0	0	8	0	0	0	2	0	0	0	0	5	0	0	0	10	0	10	0	10	8	0	10	1	100	100	80
13	6	5	Pirikool Mud R1	3	9	0	0	0	2	0	0	0	0	0	0	0	0	0	0	0	0	2	0	2	0	2	2	0	2	1	100	100	100
14	6	5	Pirikool Mud R1	3	1	0	0	0	0	0	0	1	11	0	0	0	0	12	0	1	0	11	1	11	0	12	0	0	12	1	91.6667	100	0
15	6	5	Pirikool Mud R1	3	2	0	0	0	2	0	0	1	7	0	0	0	0	8	0	1	0	9	1	9	0	10	2	0	10	1	90	100	20
16	6	5	Pirikool Mud R1	3	3	0	0	0	2	0	0	0	3	0	0	0	0	4	0	0	0	5	0	5	0	5	2	0	5	1	100	100	40
17	6	5	Pirikool Mud R1	3	4	0	2	0	2	0	0	0	8	0	0	0	0	8	0	0	2	10	0	12	2	10	4	0	12	1	100	83.3333	33.3333
18	6	5	Pirikool Mud R1	3	5	0	0	3	10	0	0	0	2	0	0	0	0	15	0	3	0	12	3	12	0	15	13	0	15	1	80	100	86.6667
19	6	5	Pirikool Mud R1	3	6	0	1	0	4	0	0	0	6	0	0	0	0	9	0	0	1	10	0	11	1	10	5	0	11	1	100	90.9091	45.4545
20	6	5	Pirikool Mud R1	3	7	0	0	0	3	0	0	0	3	0	0	0	0	3	0	0	0	6	0	6	0	6	3	0	6	1	100	100	50
21	6	5	Pirikool Mud R1	3	8	0	1	0	6	0	0	0	1	0	0	0	0	5	0	0	1	7	0	8	1	7	7	0	8	1	100	87.5	87.5
22	6	5	Pirikool Mud R1	3	9	1	1	0	6	0	0	0	8	0	0	0	0	13	1	0	1	14	1	15	2	14	8	0	16	1	93.75	87.5	50
23	6	5	Pirikool Mud R1	3	1	0	1	0	11	0	0	0	14	0	0	0	0	22	0	0	1	25	0	26	1	25	12	0	26	1	100	96.1538	46.1538
24	6	5	Pirikool Mud R1	3	2	0	0	3	21	0	0	0	16	0	0	0	0	33	0	3	0	37	3	37	0	40	24	0	40	1	92.5	100	60
25	6	5	Pirikool Mud R1	3	3	0	0	1	5	0	0	2	4	0	0	0	0	11	0	3	0	9	3	9	0	12	6	0	12	1	75	100	50
26	6	5	Pirikool Mud R1	3	4	0	0	0	4	0	0	0	5	0	0	0	0	8	0	0	0	9	0	9	0	9	4	0	9	1	100	100	44.4444
27	6	5	Pirikool Mud R1	3	5	0	0	0	9	0	0	0	2	0	0	0	0	11	0	0	0	11	0	11	0	11	9	0	11	1	100	100	81.8182
28	6	5	Pirikool Mud R1	3	6	0	1	0	5	0	0	0	4	0	0	0	0	8	0	0	1	9	0	10	1	9	6	0	10	1	100	90	60
29	6	5	Pirikool Mud R1	3	7	1	0	0	0	0	0	0	5	0	0	0	0	5	1	0	0	5	1	5	1	5	1	0	6	1	83.3333	83.3333	16.6667
30	6	5	Pirikool Mud R1	3	8	0	0	0	4	0	0	0	11	0	0	0	0	14	0	0	0	15	0	15	0	15	4	0	15	1	100	100	26.6667
31	6	5	Pirikool Mud R1	3	9	0	0	0	5	0	0	0	5	0	0	0	0	10	0	0	0	10	0	10	0	10	5	0	10	1	100	100	50
32	6	5	Pirikool Mud R1	3	1	0	1	0	2	0	0	0	2	0	0	0	0	4	0	0	1	4	0	5	1	4	3	0	5	1	100	80	60
33	6	5	Pirikool Mud R1	3	2	0	3	0	8	0	0	0	15	0	0	0	0	23	0	0	3	23	0	26	3	23	11	0	26	1	100	88.4615	42.3077
34	6	5	Pirikool Mud R1	3	3	0	1	0	5	0	0	0	16	0	0	0	0	20	0	0	1	21	0	22	1	21	6	0	22	1	100	95.4545	27.2727
35	6	5	Pirikool Mud R1	3	4	0	0	0	3	0	0	0	4	0	0	0	0	7	0	0	0	7	0	7	0	7	3	0	7	1	100	100	42.8571
36	6	5	Pirikool Mud R1	3	5	0	0	0	7	0	0	0	4	0	0	0	0	11	0	0	0	11	0	11	0	11	7	0	11	1	100	100	63.6364
37	6	5	Pirikool Mud R1	3	6	0	0	0	0	0	0	0	7	0	0	0	0	7	0	0	0	7	0	7	0	7	0	0	7	1	100	100	0
38	6	5	Pirikool Mud R1	3	7	0	1	0	3	0	0	0	2	0	0	0	0	5	0	0	1	5	0	6	1	5	4	0	6	1	100	83.3333	66.6667
39	6	5	Pirikool Mud R1	3	8	0	0	0	2	0	0	0	12	0	0	0	0	14	0	0	0	14	0	14	0	14	2	0	14	1	100	100	14.2857
40	6	5	Pirikool Mud R1	3	9	0	0	0	6	0	0	0	8	0	0	0	0	14	0	0	0	14	0	14	0	14	6	0	14	1	100	100	42.8571
41	6	5	Pirikool Mud R1	3	1	0	0	0	6	0	0	0	6	0	0	0	0	12	0	0	0	12	0	12	0	12	6	0	12	1	100	100	50
42	6	5	Pirikool Mud R1	3	2	0	0	0	9	0	0	2	13	0	0	0	0	24	0	2	0	22	2	22	0	24	9	0	24	1	91.6667	100	37.5
43	6	5	Pirikool Mud R1	3	3	0	2	0	2	0	0	0	7	0	0	0	0	9	0	0	2	9	0	11	2	9	4	0	11	1	100	81.8182	36.3636
44	6	5	Pirikool Mud R1	3	4	0	1	0	11	0	0	0	25	0	0	0	0	35	0	0	1	36	0	37	1	36	12	0	37	1	100	97.2973	32.4324
45	6	5	Pirikool Mud R1	3	5	0	0	0	7	0	0	0	5	0	0	0	0	12	0	0	0	12	0	12	0	12	7	0	12	1	100	100	58.3333
46	6	5	Pirikool Mud R1	3	6	0	0	0	16	0	0	0	7	0	0	0	0	23	0	0	0	23	0	23	0	23	16	0	23	1	100	100	69.5652
47	6	5	Pirikool Mud R1	3	7	0	1	0	28	0	0	0	7	0	0	0	0	35	0	0	1	35	0	36	1	35	29	0	36	1	100	97.2222	80.5556
48	6	5	Pirikool Mud R1	3	8	0	0	2	30	0	0	0	29	0	0	0	0	59	0	2	0	59	2	59	0	61	32	0	61	1	96.7213	100	52.459
49	6	5	Pirikool Mud R1	3	9	0	0	2	13	0	0	0	7	0	0	0	0	19	0	2	0	20	2	20	0	22	15	0	22	1	90.9091	100	68.1818
50	6	5	Pirikool Mud R1	3	1	0	0	0	12	0	0	0	12	0	0	0	0	24	0	0	0	24	0	24	0	24	12	0	24	1	100	100	50
51	6	5	Pirikool Mud R1	3	2	0	3	0	17	0	0	0	30	0	0	0	0	44	0	0	3	47	0	50	3	47	20	0	50	1	100	94	40
52	6	5	Pirikool Mud R1	3	3	0	0	1	17	0	0	0	18	0	0	0	0	35	0	1	0	35	1	35	0	36	18	0	36	1	97.2222	100	50
53	6	5	Pirikool Mud R1	3	4	0	0	21	33	0	0	3	10	0	0	0	0	67	0	24	0	43	24	43	0	67	54	0	67	1	64.1791	100	80.597
54	6	5	Pirikool Mud R1	3	5	0	0	1	15	0	0	0	5	0	0	0	0	21	0	1	0	20	1	20	0	21	16	0	21	1	95.2381	100	76.1905
67	6	5	Pirikool Mud R1	3	6	0	0	1	3	0	0	0	4	0	0	0	0	7	0	1	0	7	1	7	0	8	4	0	8	1	87.5	100	50
68	6	5	Pirikool Mud R1	3	7	0	0	1	12	0	0	0	13	0	0	0	0	26	0	1	0	25	1	25	0	26	13	0	26	1	96.1538	100	50
69	6	5	Pirikool Mud R1	3	8	0	0	3	18	0	0	2	51	0	0	0	0	74	0	5	0	69	5	69	0	74	21	0	74	1	93.2432	100	28.3784
70	6	5	Pirikool Mud R1	3	9	0	0	0	7	0	0	0	22	0	0	0	0	29	0	0	0	29	0	29	0	29	7	0	29	1	100	100	24.1379
71	6	5	Pirikool Mud R1	3	1	0	0	0	11	0	0	0	10	0	0	0	0	21	0	0	0	21	0	21	0	21	11	0	21	1	100	100	52.381
72	6	5	Pirikool Mud R1	3	2	0	0	2	33	0	0	0	26	0	0	0	0	61	0	2	0	59	2	59	0	61	35	0	61	1	96.7213	100	57.377
73	6	5	Pirikool Mud R1	3	3	0	0	2	31	0	0	2	15	0	0	0	0	50	0	4	0	46	4	46	0	50	33	0	50	1	92	100	66
74	6	5	Pirikool Mud R1	3	4	0	0	0	6	0	0	1	16	0	0	0	0	21	0	1	0	22	1	22	0	23	6	0	23	1	95.6522	100	26.087
75	6	5	Pirikool Mud R1	3	5	1	0	5	11	0	0	0	9	0	0	0	0	19	1	5	0	20	6	20	1	25	17	0	26	1	76.9231	96.1538	65.3846
76	6	5	Pirikool Mud R1	3	6	0	2	1	5	0	0	0	6	0	0	0	0	6	0	1	2	11	1	13	2	12	8	0	14	1	92.8571	85.7143	57.1429
77	6	5	Pirikool Mud R1	3	7	0	0	2	25	0	0	1	10	0	0	0	0	36	0	3	0	35	3	35	0	38	27	0	38	1	92.1053	100	71.0526
78	6	5	Pirikool Mud R1	3	8	0	0	2	8	0	0	2	2	0	0	0	0	13	0	4	0	10	4	10	0	14	10	0	14	1	71.4286	100	71.4286
79	6	5	Pirikool Mud R1	3	9	0	-1	1	11	0	0	1	6	0	0	0	0	18	0	2	-1	17	2	16	-1	19	11	0	18	1	88.8889	105.556	61.1111
80	6	5	Pirikool Mud R1	3	1	0	0	0	8	0	0	0	15	0	0	0	0	22	0	0	0	23	0	23	0	23	8	0	23	1	100	100	34.7826
81	6	5	Pirikool Mud R1	3	2	0	0	0	11	0	0	0	26	0	0	0	0	37	0	0	0	37	0	37	0	37	11	0	37	1	100	100	29.7297
82	6	5	Pirikool Mud R1	3	3	0	0	1	7	0	0	0	11	0	0	0	0	18	0	1	0	18	1	18	0	19	8	0	19	1	94.7368	100	42.1053
83	6	5	Pirikool Mud R1	3	4	0	0	2	2	0	0	0	6	0	0	0	0	9	0	2	0	8	2	8	0	10	4	0	10	1	80	100	40
84	6	5	Pirikool Mud R1	3	5	0	0	0	2	0	0	0	0	0	0	0	0	1	0	0	0	2	0	2	0	2	2	0	2	1	100	100	100
85	6	5	Pirikool Mud R1	3	6	0	0	0	2	0	0	0	3	0	0	0	0	4	0	0	0	5	0	5	0	5	2	0	5	1	100	100	40
86	6	5	Pirikool Mud R1	3	7	0	0	0	3	0	0	0	3	0	0	0	0	5	0	0	0	6	0	6	0	6	3	0	6	1	100	100	50
87	6	5	Pirikool Mud R1	3	8	0	0	0	1	0	0	0	1	0	0	0	0	1	0	0	0	2	0	2	0	2	1	0	2	1	100	100	50
88	6	5	Pirikool Mud R1	3	9	0	0	1	3	0	0	1	7	0	0	0	0	12	0	2	0	10	2	10	0	12	4	0	12	1	83.3333	100	33.3333
89	6	5	Pirikool Mud R1	3	1	0	0	0	5	0	0	0	9	0	0	0	0	14	0	0	0	14	0	14	0	14	5	0	14	1	100	100	35.7143
90	6	5	Pirikool Mud R1	3	2	0	0	0	0	0	0	0	9	0	0	0	0	9	0	0	0	9	0	9	0	9	0	0	9	1	100	100	0
91	6	5	Pirikool Mud R1	3	3	0	0	0	4	0	0	3	12	0	0	0	0	19	0	3	0	16	3	16	0	19	4	0	19	1	84.2105	100	21.0526
92	6	5	Pirikool Mud R1	3	4	0	0	2	7	0	0	1	25	0	0	0	0	35	0	3	0	32	3	32	0	35	9	0	35	1	91.4286	100	25.7143
93	6	5	Pirikool Mud R1	3	5	0	0	0	6	0	0	0	19	0	0	0	0	25	0	0	0	25	0	25	0	25	6	0	25	1	100	100	24
94	6	5	Pirikool Mud R1	3	6	0	0	0	5	0	0	0	6	0	0	0	0	9	0	0	0	11	0	11	0	11	5	0	11	1	100	100	45.4545
95	6	5	Pirikool Mud R1	3	7	0	0	1	2	0	0	0	7	0	0	0	0	10	0	1	0	9	1	9	0	10	3	0	10	1	90	100	30
96	6	5	Pirikool Mud R1	3	8	0	0	0	3	0	0	0	4	0	0	0	0	7	0	0	0	7	0	7	0	7	3	0	7	1	100	100	42.8571
97	6	5	Pirikool Mud R1	3	9	0	0	0	10	0	0	0	12	0	0	0	0	22	0	0	0	22	0	22	0	22	10	0	22	1	100	100	45.4545
98	6	5	Pirikool Mud R1	3	1	0	0	0	13	0	0	0	12	0	0	0	0	22	0	0	0	25	0	25	0	25	13	0	25	1	100	100	52
99	6	5	Pirikool Mud R1	3	2	0	0	0	11	0	0	0	17	0	0	0	0	28	0	0	0	28	0	28	0	28	11	0	28	1	100	100	39.2857
100	6	5	Pirikool Mud R1	3	3	0	0	0	11	0	0	0	14	0	0	0	0	25	0	0	0	25	0	25	0	25	11	0	25	1	100	100	44
101	6	5	Pirikool Mud R1	3	4	0	0	0	2	0	0	0	13	0	0	0	0	15	0	0	0	15	0	15	0	15	2	0	15	1	100	100	13.3333
102	6	5	Pirikool Mud R1	3	5	0	0	0	6	0	0	0	1	0	0	0	0	7	0	0	0	7	0	7	0	7	6	0	7	1	100	100	85.7143
103	6	5	Pirikool Mud R1	3	6	0	0	0	4	0	0	0	6	0	0	0	0	10	0	0	0	10	0	10	0	10	4	0	10	1	100	100	40
104	6	5	Pirikool Mud R1	3	7	0	0	0	18	0	0	0	12	0	0	0	0	30	0	0	0	30	0	30	0	30	18	0	30	1	100	100	60
105	6	5	Pirikool Mud R1	3	8	0	0	0	8	0	0	0	8	0	0	0	0	16	0	0	0	16	0	16	0	16	8	0	16	1	100	100	50
106	6	5	Pirikool Mud R1	3	9	0	0	0	7	0	0	0	16	0	0	0	0	23	0	0	0	23	0	23	0	23	7	0	23	1	100	100	30.4348
107	6	5	Pirikool Mud R1	3	1	0	0	0	13	0	0	0	18	0	0	0	0	31	0	0	0	31	0	31	0	31	13	0	31	1	100	100	41.9355
108	6	5	Pirikool Mud R1	3	2	0	0	0	6	0	0	0	7	0	0	0	0	13	0	0	0	13	0	13	0	13	6	0	13	1	100	100	46.1538
109	6	5	Pirikool Mud R1	3	3	0	0	0	10	0	0	0	6	0	0	0	0	16	0	0	0	16	0	16	0	16	10	0	16	1	100	100	62.5
110	6	5	Pirikool Mud R1	3	4	0	0	0	5	0	0	0	6	0	0	0	0	8	0	0	0	11	0	11	0	11	5	0	11	1	100	100	45.4545
111	6	5	Pirikool Mud R1	3	5	0	0	0	7	0	0	0	3	0	0	0	0	9	0	0	0	10	0	10	0	10	7	0	10	1	100	100	70
112	6	5	Pirikool Mud R1	3	6	0	0	0	9	0	0	0	4	0	0	0	0	13	0	0	0	13	0	13	0	13	9	0	13	1	100	100	69.2308
113	6	5	Pirikool Mud R1	3	7	0	0	3	15	0	0	0	4	0	0	0	0	19	0	3	0	19	3	19	0	22	18	0	22	1	86.3636	100	81.8182
115	6	5	Pirikool Mud R1	3	9	0	0	0	7	0	0	0	2	0	0	0	0	7	0	0	0	9	0	9	0	9	7	0	9	1	100	100	77.7778
116	6	5	Pirikool Mud R1	3	1	0	0	0	9	0	0	0	4	0	0	0	0	13	0	0	0	13	0	13	0	13	9	0	13	1	100	100	69.2308
117	6	5	Pirikool Mud R1	3	2	0	0	0	6	0	0	0	7	0	0	0	0	11	0	0	0	13	0	13	0	13	6	0	13	1	100	100	46.1538
118	6	5	Pirikool Mud R1	3	3	0	0	0	7	0	0	0	7	0	0	0	0	12	0	0	0	14	0	14	0	14	7	0	14	1	100	100	50
119	6	5	Pirikool Mud R1	3	4	0	1	0	8	0	0	0	9	0	0	0	0	13	0	0	1	17	0	18	1	17	9	0	18	1	100	94.4444	50
120	6	5	Pirikool Mud R1	3	5	0	0	2	6	0	0	0	4	0	0	0	0	9	0	2	0	10	2	10	0	12	8	0	12	1	83.3333	100	66.6667
121	6	5	Pirikool Mud R1	3	6	0	3	0	6	0	0	0	8	0	0	0	0	14	0	0	3	14	0	17	3	14	9	0	17	1	100	82.3529	52.9412
122	6	5	Pirikool Mud R1	3	7	0	0	0	8	0	0	0	10	0	0	0	0	18	0	0	0	18	0	18	0	18	8	0	18	1	100	100	44.4444
123	6	5	Pirikool Mud R1	3	8	0	0	0	7	0	0	0	0	0	0	0	0	7	0	0	0	7	0	7	0	7	7	0	7	1	100	100	100
124	6	5	Pirikool Mud R1	3	9	0	1	0	0	0	0	0	3	0	0	0	0	3	0	0	1	3	0	4	1	3	1	0	4	1	100	75	25
125	6	5	Pirikool Mud R1	3	1	0	2	0	1	0	0	0	2	0	0	0	0	3	0	0	2	3	0	5	2	3	3	0	5	1	100	60	60
126	6	5	Pirikool Mud R1	3	2	0	3	0	0	0	0	0	6	0	0	0	0	6	0	0	3	6	0	9	3	6	3	0	9	1	100	66.6667	33.3333
127	6	5	Pirikool Mud R1	3	3	0	2	0	7	0	0	0	9	0	0	0	0	13	0	0	2	16	0	18	2	16	9	0	18	1	100	88.8889	50
128	6	5	Pirikool Mud R1	3	4	0	3	0	7	0	0	0	11	0	0	0	0	15	0	0	3	18	0	21	3	18	10	0	21	1	100	85.7143	47.619
129	6	5	Pirikool Mud R1	3	5	0	4	0	7	0	0	0	3	0	0	0	0	9	0	0	4	10	0	14	4	10	11	0	14	1	100	71.4286	78.5714
130	6	5	Pirikool Mud R1	3	6	0	2	0	9	0	0	0	9	0	0	0	0	17	0	0	2	18	0	20	2	18	11	0	20	1	100	90	55
131	6	5	Pirikool Mud R1	3	7	0	2	0	10	0	0	0	19	0	0	0	0	29	0	0	2	29	0	31	2	29	12	0	31	1	100	93.5484	38.7097
132	6	5	Pirikool Mud R1	3	8	0	1	0	14	0	0	0	7	0	0	0	0	21	0	0	1	21	0	22	1	21	15	0	22	1	100	95.4545	68.1818
133	6	5	Pirikool Mud R1	3	9	0	1	0	3	0	0	0	6	0	0	0	0	9	0	0	1	9	0	10	1	9	4	0	10	1	100	90	40
134	6	5	Pirikool Mud R1	3	1	0	0	0	7	0	0	0	8	0	0	0	0	14	0	0	0	15	0	15	0	15	7	0	15	1	100	100	46.6667
135	6	5	Pirikool Mud R1	3	2	0	1	0	6	0	0	0	5	0	0	0	0	10	0	0	1	11	0	12	1	11	7	0	12	1	100	91.6667	58.3333
136	6	5	Pirikool Mud R1	3	3	0	-2	0	7	0	0	0	6	0	0	0	0	11	0	0	-2	13	0	11	-2	13	5	0	11	1	100	118.182	45.4545
137	6	5	Pirikool Mud R1	3	4	0	2	0	7	0	0	0	6	0	0	0	0	11	0	0	2	13	0	15	2	13	9	0	15	1	100	86.6667	60
138	6	5	Pirikool Mud R1	3	5	0	2	0	0	0	0	0	4	0	0	0	0	4	0	0	2	4	0	6	2	4	2	0	6	1	100	66.6667	33.3333
139	6	5	Pirikool Mud R1	3	6	0	0	0	9	0	0	0	0	0	0	0	0	8	0	0	0	9	0	9	0	9	9	0	9	1	100	100	100
140	6	5	Pirikool Mud R1	3	7	0	0	0	9	0	0	0	8	0	0	0	0	12	0	0	0	17	0	17	0	17	9	0	17	1	100	100	52.9412
141	6	5	Pirikool Mud R1	3	8	0	6	0	5	0	0	0	7	0	0	0	0	8	0	0	6	12	0	18	6	12	11	0	18	1	100	66.6667	61.1111
142	6	5	Pirikool Mud R1	3	9	0	1	0	8	0	0	0	17	0	0	0	0	24	0	0	1	25	0	26	1	25	9	0	26	1	100	96.1538	34.6154
143	6	5	Pirikool Mud R1	3	1	0	2	0	0	0	0	0	8	0	0	0	0	8	0	0	2	8	0	10	2	8	2	0	10	1	100	80	20
144	6	5	Pirikool Mud R1	3	2	0	6	0	1	0	0	0	6	0	0	0	0	7	0	0	6	7	0	13	6	7	7	0	13	1	100	53.8462	53.8462
145	6	5	Pirikool Mud R1	3	3	0	6	2	4	0	0	0	0	0	0	0	0	6	0	2	6	4	2	10	6	6	12	0	12	1	83.3333	50	100
146	6	5	Pirikool Mud R1	3	4	0	0	0	5	0	0	0	10	0	0	0	0	15	0	0	0	15	0	15	0	15	5	0	15	1	100	100	33.3333
147	6	5	Pirikool Mud R1	3	5	1	1	1	4	0	0	0	0	0	0	0	0	4	1	1	1	4	2	5	2	5	7	0	7	1	71.4286	71.4286	100
148	6	5	Pirikool Mud R1	3	6	0	5	0	0	0	0	1	5	0	0	0	0	6	0	1	5	5	1	10	5	6	5	0	11	1	90.9091	54.5455	45.4545
149	6	5	Pirikool Mud R1	3	7	0	2	0	4	0	0	0	8	0	0	0	0	12	0	0	2	12	0	14	2	12	6	0	14	1	100	85.7143	42.8571
150	6	5	Pirikool Mud R1	3	8	0	1	0	0	0	0	0	4	0	0	0	0	4	0	0	1	4	0	5	1	4	1	0	5	1	100	80	20
151	6	5	Pirikool Mud R1	3	9	0	2	0	1	0	0	0	7	0	0	0	0	8	0	0	2	8	0	10	2	8	3	0	10	1	100	80	30
152	6	5	Pirikool Mud R1	3	1	0	2	0	6	0	0	0	6	0	0	0	0	12	0	0	2	12	0	14	2	12	8	0	14	1	100	85.7143	57.1429
153	6	5	Pirikool Mud R1	3	2	0	1	0	6	0	0	0	14	0	0	0	0	18	0	0	1	20	0	21	1	20	7	0	21	1	100	95.2381	33.3333
154	6	5	Pirikool Mud R1	3	3	0	1	0	4	0	0	0	3	0	0	0	0	6	0	0	1	7	0	8	1	7	5	0	8	1	100	87.5	62.5
155	6	5	Pirikool Mud R1	3	4	0	1	0	2	0	0	0	4	0	0	0	0	6	0	0	1	6	0	7	1	6	3	0	7	1	100	85.7143	42.8571
156	6	5	Pirikool Mud R1	3	5	0	3	0	3	0	0	0	0	0	0	0	0	3	0	0	3	3	0	6	3	3	6	0	6	1	100	50	100
157	6	5	Pirikool Mud R1	3	6	0	9	0	5	0	0	0	6	0	0	0	0	11	0	0	9	11	0	20	9	11	14	0	20	1	100	55	70
158	6	5	Pirikool Mud R1	3	7	0	11	0	5	0	0	0	1	0	0	0	0	6	0	0	11	6	0	17	11	6	16	0	17	1	100	35.2941	94.1176
159	6	5	Pirikool Mud R1	3	8	0	3	0	4	0	0	0	2	0	0	0	0	4	0	0	3	6	0	9	3	6	7	0	9	1	100	66.6667	77.7778
160	6	5	Pirikool Mud R1	3	9	0	7	0	5	0	0	0	5	0	0	0	0	9	0	0	7	10	0	17	7	10	12	0	17	1	100	58.8235	70.5882
161	6	5	Pirikool Mud R1	3	1	0	9	0	4	0	0	0	10	0	0	0	0	13	0	0	9	14	0	23	9	14	13	0	23	1	100	60.8696	56.5217
162	6	5	Pirikool Mud R1	3	2	0	2	0	3	0	0	0	0	0	0	0	0	3	0	0	2	3	0	5	2	3	5	0	5	1	100	60	100
163	6	5	Pirikool Mud R1	3	3	0	3	0	0	0	0	0	6	0	0	0	0	6	0	0	3	6	0	9	3	6	3	0	9	1	100	66.6667	33.3333
164	6	5	Pirikool Mud R1	3	4	0	1	0	11	0	0	0	13	0	0	0	0	20	0	0	1	24	0	25	1	24	12	0	25	1	100	96	48
165	6	5	Pirikool Mud R1	3	5	0	4	0	3	0	0	0	0	0	0	0	0	3	0	0	4	3	0	7	4	3	7	0	7	1	100	42.8571	100
166	6	5	Pirikool Mud R1	3	6	0	1	0	3	0	0	0	5	0	0	0	0	8	0	0	1	8	0	9	1	8	4	0	9	1	100	88.8889	44.4444
167	6	5	Pirikool Mud R1	3	7	0	6	0	4	0	0	0	11	0	0	0	0	14	0	0	6	15	0	21	6	15	10	0	21	1	100	71.4286	47.619
168	6	5	Pirikool Mud R1	3	8	0	5	0	3	0	0	0	3	0	0	0	0	6	0	0	5	6	0	11	5	6	8	0	11	1	100	54.5455	72.7273
169	6	5	Pirikool Mud R1	3	9	0	1	0	4	0	0	0	5	0	0	0	0	9	0	0	1	9	0	10	1	9	5	0	10	1	100	90	50
170	6	5	Pirikool Mud R1	3	1	0	8	0	9	0	0	0	10	0	0	0	0	16	0	0	8	19	0	27	8	19	17	0	27	1	100	70.3704	62.963
171	6	5	Pirikool Mud R1	3	2	0	5	0	2	0	0	0	15	0	0	0	0	17	0	0	5	17	0	22	5	17	7	0	22	1	100	77.2727	31.8182
172	6	5	Pirikool Mud R1	3	3	0	3	0	6	0	0	0	12	0	0	0	0	17	0	0	3	18	0	21	3	18	9	0	21	1	100	85.7143	42.8571
173	6	5	Pirikool Mud R1	3	4	0	9	0	4	0	0	0	12	0	0	0	0	16	0	0	9	16	0	25	9	16	13	0	25	1	100	64	52
174	6	5	Pirikool Mud R1	3	5	0	11	0	14	0	0	0	0	0	0	0	0	13	0	0	11	14	0	25	11	14	25	0	25	1	100	56	100
175	6	5	Pirikool Mud R1	3	6	0	9	0	5	0	0	0	8	0	0	0	0	13	0	0	9	13	0	22	9	13	14	0	22	1	100	59.0909	63.6364
176	6	5	Pirikool Mud R1	3	7	0	11	0	7	0	0	0	14	0	0	0	0	21	0	0	11	21	0	32	11	21	18	0	32	1	100	65.625	56.25
177	6	5	Pirikool Mud R1	3	8	0	8	0	7	0	0	0	7	0	0	0	0	13	0	0	8	14	0	22	8	14	15	0	22	1	100	63.6364	68.1818
178	6	5	Pirikool Mud R1	3	9	0	7	0	13	0	0	0	7	0	0	0	0	20	0	0	7	20	0	27	7	20	20	0	27	1	100	74.0741	74.0741
179	6	5	Pirikool Mud R1	3	1	0	0	0	1	0	0	2	8	0	0	0	0	11	0	2	0	9	2	9	0	11	1	0	11	1	81.8182	100	9.09091
180	6	5	Pirikool Mud R1	3	2	0	3	0	0	0	0	0	18	0	0	0	0	18	0	0	3	18	0	21	3	18	3	0	21	1	100	85.7143	14.2857
181	6	5	Pirikool Mud R1	3	3	0	7	0	4	0	0	0	6	0	0	0	0	9	0	0	7	10	0	17	7	10	11	0	17	1	100	58.8235	64.7059
182	6	5	Pirikool Mud R1	3	4	0	3	0	8	0	0	0	12	0	0	0	0	18	0	0	3	20	0	23	3	20	11	0	23	1	100	86.9565	47.8261
183	6	5	Pirikool Mud R1	3	5	0	3	0	4	0	0	0	0	0	0	0	0	3	0	0	3	4	0	7	3	4	7	0	7	1	100	57.1429	100
184	6	5	Pirikool Mud R1	3	6	0	2	0	3	0	0	0	8	0	0	0	0	11	0	0	2	11	0	13	2	11	5	0	13	1	100	84.6154	38.4615
185	6	5	Pirikool Mud R1	3	7	0	8	0	3	0	0	0	8	0	0	0	0	11	0	0	8	11	0	19	8	11	11	0	19	1	100	57.8947	57.8947
186	6	5	Pirikool Mud R1	3	8	0	6	0	3	0	0	0	16	0	0	0	0	19	0	0	6	19	0	25	6	19	9	0	25	1	100	76	36
187	6	5	Pirikool Mud R1	3	9	0	2	0	3	0	0	0	5	0	0	0	0	8	0	0	2	8	0	10	2	8	5	0	10	1	100	80	50
188	6	5	Pirikool Mud R1	3	1	8	8	0	15	0	0	0	12	0	0	0	0	25	8	0	8	27	8	35	16	27	31	0	43	1	81.3953	62.7907	72.093
189	6	5	Pirikool Mud R1	3	2	0	9	0	5	0	0	0	12	0	0	0	0	17	0	0	9	17	0	26	9	17	14	0	26	1	100	65.3846	53.8462
190	6	5	Pirikool Mud R1	3	3	0	6	0	6	0	0	0	6	0	0	0	0	11	0	0	6	12	0	18	6	12	12	0	18	1	100	66.6667	66.6667
191	6	5	Pirikool Mud R1	3	4	0	2	0	7	0	0	0	16	0	0	0	0	21	0	0	2	23	0	25	2	23	9	0	25	1	100	92	36
192	6	5	Pirikool Mud R1	3	5	0	3	0	6	0	0	0	0	0	0	0	0	6	0	0	3	6	0	9	3	6	9	0	9	1	100	66.6667	100
193	6	5	Pirikool Mud R1	3	6	0	2	0	5	0	0	0	5	0	0	0	0	10	0	0	2	10	0	12	2	10	7	0	12	1	100	83.3333	58.3333
194	6	5	Pirikool Mud R1	3	7	0	2	0	7	0	0	0	5	0	0	0	0	10	0	0	2	12	0	14	2	12	9	0	14	1	100	85.7143	64.2857
195	6	5	Pirikool Mud R1	3	8	0	0	0	2	0	0	0	2	0	0	0	0	4	0	0	0	4	0	4	0	4	2	0	4	1	100	100	50
196	6	5	Pirikool Mud R1	3	9	1	1	0	3	0	0	0	5	0	0	0	0	8	1	0	1	8	1	9	2	8	5	0	10	1	90	80	50
197	6	5	Pirikool Mud R1	3	1	1	3	0	3	0	0	0	4	0	0	0	0	7	1	0	3	7	1	10	4	7	7	0	11	1	90.9091	63.6364	63.6364
198	6	5	Pirikool Mud R1	3	2	1	1	0	0	0	0	0	16	0	0	0	0	16	1	0	1	16	1	17	2	16	2	0	18	1	94.4444	88.8889	11.1111
199	6	5	Pirikool Mud R1	3	3	0	0	0	0	0	0	0	6	0	0	0	0	6	0	0	0	6	0	6	0	6	0	0	6	1	100	100	0
200	6	5	Pirikool Mud R1	3	4	0	0	0	6	0	0	0	3	0	0	0	0	7	0	0	0	9	0	9	0	9	6	0	9	1	100	100	66.6667
202	6	5	Pirikool Mud R1	3	6	0	4	0	3	0	0	0	4	0	0	0	0	7	0	0	4	7	0	11	4	7	7	0	11	1	100	63.6364	63.6364
203	6	5	Pirikool Mud R1	3	7	0	1	0	3	0	0	0	6	0	0	0	0	9	0	0	1	9	0	10	1	9	4	0	10	1	100	90	40
204	6	5	Pirikool Mud R1	3	8	0	0	0	0	0	0	0	3	0	0	0	0	3	0	0	0	3	0	3	0	3	0	0	3	1	100	100	0
205	6	5	Pirikool Mud R1	3	9	0	1	0	3	0	0	0	6	0	0	0	0	9	0	0	1	9	0	10	1	9	4	0	10	1	100	90	40
206	6	5	Pirikool Mud R1	3	1	0	6	0	2	0	0	0	3	0	0	0	0	5	0	0	6	5	0	11	6	5	8	0	11	1	100	45.4545	72.7273
207	6	5	Pirikool Mud R1	3	2	0	3	0	2	0	0	0	6	0	0	0	0	8	0	0	3	8	0	11	3	8	5	0	11	1	100	72.7273	45.4545
208	6	5	Pirikool Mud R1	3	3	2	10	0	5	0	0	0	11	0	0	0	0	16	2	0	10	16	2	26	12	16	17	0	28	1	92.8571	57.1429	60.7143
209	6	5	Pirikool Mud R1	3	4	0	4	0	1	0	0	0	13	0	0	0	0	14	0	0	4	14	0	18	4	14	5	0	18	1	100	77.7778	27.7778
210	6	5	Pirikool Mud R1	3	5	0	3	0	0	0	0	0	0	0	0	0	0	0	0	0	3	0	0	3	3	0	3	0	3	1	100	0	100
211	6	5	Pirikool Mud R1	3	6	0	5	0	4	0	0	0	2	0	0	0	0	6	0	0	5	6	0	11	5	6	9	0	11	1	100	54.5455	81.8182
212	6	5	Pirikool Mud R1	3	7	0	0	0	2	0	0	0	5	0	0	0	0	7	0	0	0	7	0	7	0	7	2	0	7	1	100	100	28.5714
213	6	5	Pirikool Mud R1	3	8	0	2	0	1	0	0	0	2	0	0	0	0	3	0	0	2	3	0	5	2	3	3	0	5	1	100	60	60
214	6	5	Pirikool Mud R1	3	9	0	1	0	3	0	0	0	3	0	0	0	0	5	0	0	1	6	0	7	1	6	4	0	7	1	100	85.7143	57.1429
215	6	5	Pirikool Mud R1	3	1	0	3	0	2	0	0	0	4	0	0	0	0	6	0	0	3	6	0	9	3	6	5	0	9	1	100	66.6667	55.5556
216	6	5	Pirikool Mud R1	3	2	0	0	0	0	0	0	0	8	0	0	0	0	8	0	0	0	8	0	8	0	8	0	0	8	1	100	100	0
217	6	5	Pirikool Mud R1	3	3	0	0	0	0	0	0	0	8	0	0	0	0	8	0	0	0	8	0	8	0	8	0	0	8	1	100	100	0
218	6	5	Pirikool Mud R1	3	4	1	3	0	3	0	0	0	6	0	0	0	0	9	1	0	3	9	1	12	4	9	7	0	13	1	92.3077	69.2308	53.8462
219	6	5	Pirikool Mud R1	3	5	0	0	0	0	0	0	0	3	0	0	0	0	3	0	0	0	3	0	3	0	3	0	0	3	1	100	100	0
220	6	5	Pirikool Mud R1	3	6	0	1	0	1	0	0	0	1	0	0	0	0	2	0	0	1	2	0	3	1	2	2	0	3	1	100	66.6667	66.6667
221	6	5	Pirikool Mud R1	3	7	0	1	0	0	0	0	0	3	0	0	0	0	3	0	0	1	3	0	4	1	3	1	0	4	1	100	75	25
223	6	5	Pirikool Mud R1	3	9	0	2	0	1	0	0	0	0	0	0	0	0	1	0	0	2	1	0	3	2	1	3	0	3	1	100	33.3333	100
225	6	5	Pirikool Mud R1	3	2	0	0	0	0	0	0	0	2	0	0	0	0	2	0	0	0	2	0	2	0	2	0	0	2	1	100	100	0
226	6	5	Pirikool Mud R1	3	3	0	2	0	1	0	0	0	3	0	0	0	0	4	0	0	2	4	0	6	2	4	3	0	6	1	100	66.6667	50
227	6	5	Pirikool Mud R1	3	4	0	2	0	0	0	0	0	3	0	0	0	0	3	0	0	2	3	0	5	2	3	2	0	5	1	100	60	40
228	6	5	Pirikool Mud R1	3	5	1	2	0	0	0	0	0	1	0	0	0	0	1	1	0	2	1	1	3	3	1	3	0	4	1	75	25	75
229	6	5	Pirikool Mud R1	3	6	0	0	0	1	0	0	0	0	0	0	0	0	0	0	0	0	1	0	1	0	1	1	0	1	1	100	100	100
230	6	5	Pirikool Mud R1	3	7	0	1	0	0	0	0	0	0	0	0	0	0	0	0	0	1	0	0	1	1	0	1	0	1	1	100	0	100
234	6	5	Pirikool Mud R1	3	2	0	2	0	0	0	0	0	1	0	0	0	0	1	0	0	2	1	0	3	2	1	2	0	3	1	100	33.3333	66.6667
236	6	5	Pirikool Mud R1	3	4	0	1	0	0	0	0	0	2	0	0	0	0	2	0	0	1	2	0	3	1	2	1	0	3	1	100	66.6667	33.3333
253	6	5	Pirikool Mud R1	3	3	0	0	0	0	0	0	0	2	0	0	0	0	2	0	0	0	2	0	2	0	2	0	0	2	1	100	100	0
254	6	5	Pirikool Mud R1	3	4	0	0	0	0	0	0	0	3	0	0	0	0	3	0	0	0	3	0	3	0	3	0	0	3	1	100	100	0
255	6	5	Pirikool Mud R1	3	5	0	1	0	0	0	0	0	0	0	0	0	0	0	0	0	1	0	0	1	1	0	1	0	1	1	100	0	100
257	6	5	Pirikool Mud R1	3	7	0	1	0	1	0	0	0	1	0	0	0	0	1	0	0	1	2	0	3	1	2	2	0	3	1	100	66.6667	66.6667
258	6	5	Pirikool Mud R1	3	8	0	0	0	0	0	0	1	0	0	0	0	0	1	0	1	0	0	1	0	0	1	0	0	1	1	0	100	0
263	6	5	Pirikool Mud R1	3	4	0	2	0	0	0	0	0	0	0	0	0	0	0	0	0	2	0	0	2	2	0	2	0	2	1	100	0	100
264	6	5	Pirikool Mud R1	3	5	0	1	0	0	0	0	0	0	0	0	0	0	0	0	0	1	0	0	1	1	0	1	0	1	1	100	0	100
265	6	5	Pirikool Mud R1	3	6	0	2	0	0	0	0	0	1	0	0	0	0	1	0	0	2	1	0	3	2	1	2	0	3	1	100	33.3333	66.6667
266	6	5	Pirikool Mud R1	3	7	0	1	0	0	0	0	0	0	0	0	0	0	0	0	0	1	0	0	1	1	0	1	0	1	1	100	0	100
271	6	5	Pirikool Mud R1	3	3	0	0	0	0	0	0	0	1	0	0	0	0	1	0	0	0	1	0	1	0	1	0	0	1	1	100	100	0
272	6	5	Pirikool Mud R1	3	4	0	1	0	0	0	0	0	0	0	0	0	0	0	0	0	1	0	0	1	1	0	1	0	1	1	100	0	100
273	6	5	Pirikool Mud R1	3	5	0	1	0	0	0	0	0	0	0	0	0	0	0	0	0	1	0	0	1	1	0	1	0	1	1	100	0	100
274	6	5	Pirikool Mud R1	3	6	1	1	0	0	0	0	0	1	0	0	0	0	1	1	0	1	1	1	2	2	1	2	0	3	1	66.6667	33.3333	66.6667
277	6	5	Pirikool Mud R1	3	9	0	4	0	0	0	0	0	1	0	0	0	0	1	0	0	4	1	0	5	4	1	4	0	5	1	100	20	80
280	6	5	Pirikool Mud R1	3	3	0	2	0	0	0	0	0	0	0	0	0	0	0	0	0	2	0	0	2	2	0	2	0	2	1	100	0	100
283	6	5	Pirikool Mud R1	3	6	0	1	0	1	0	0	0	0	0	0	0	0	0	0	0	1	1	0	2	1	1	2	0	2	1	100	50	100
284	6	5	Pirikool Mud R1	3	7	0	1	0	0	0	0	0	0	0	0	0	0	0	0	0	1	0	0	1	1	0	1	0	1	1	100	0	100
285	6	5	Pirikool Mud R1	3	8	0	1	0	0	0	0	0	0	0	0	0	0	0	0	0	1	0	0	1	1	0	1	0	1	1	100	0	100
286	6	5	Pirikool Mud R1	3	9	0	1	0	1	0	0	0	0	0	0	0	0	1	0	0	1	1	0	2	1	1	2	0	2	1	100	50	100
287	6	5	Pirikool Mud R1	3	1	0	2	0	0	0	0	0	1	0	0	0	0	1	0	0	2	1	0	3	2	1	2	0	3	1	100	33.3333	66.6667
288	6	5	Pirikool Mud R1	3	2	0	2	0	0	0	0	0	0	0	0	0	0	0	0	0	2	0	0	2	2	0	2	0	2	1	100	0	100
1	7	6	Actellic Mud R1	4	7	0	0	0	2	0	0	0	1	0	0	0	0	1	0	0	0	3	0	3	0	3	2	0	3	1	100	100	66.6667
7	7	6	Actellic Mud R1	4	4	0	0	0	1	0	0	0	1	0	0	0	0	1	0	0	0	2	0	2	0	2	1	0	2	1	100	100	50
8	7	6	Actellic Mud R1	4	5	0	0	1	5	0	0	0	0	0	0	0	0	5	0	1	0	5	1	5	0	6	6	0	6	1	83.3333	100	100
9	7	6	Actellic Mud R1	4	6	0	0	0	0	0	0	0	3	0	0	0	0	3	0	0	0	3	0	3	0	3	0	0	3	1	100	100	0
10	7	6	Actellic Mud R1	4	7	0	0	0	3	0	0	0	1	0	0	0	0	4	0	0	0	4	0	4	0	4	3	0	4	1	100	100	75
11	7	6	Actellic Mud R1	4	8	0	0	0	0	0	0	0	2	0	0	0	0	2	0	0	0	2	0	2	0	2	0	0	2	1	100	100	0
13	7	6	Actellic Mud R1	4	1	0	0	0	3	0	0	0	0	0	0	0	0	2	0	0	0	3	0	3	0	3	3	0	3	1	100	100	100
14	7	6	Actellic Mud R1	4	2	0	0	0	5	0	0	0	2	0	0	0	0	5	0	0	0	7	0	7	0	7	5	0	7	1	100	100	71.4286
15	7	6	Actellic Mud R1	4	3	0	0	0	3	0	0	1	1	0	0	0	0	3	0	1	0	4	1	4	0	5	3	0	5	1	80	100	60
16	7	6	Actellic Mud R1	4	4	0	2	0	1	0	0	0	6	0	0	0	0	6	0	0	2	7	0	9	2	7	3	0	9	1	100	77.7778	33.3333
17	7	6	Actellic Mud R1	4	5	0	0	0	1	0	0	0	5	0	0	0	0	6	0	0	0	6	0	6	0	6	1	0	6	1	100	100	16.6667
18	7	6	Actellic Mud R1	4	6	0	0	0	5	0	0	1	5	0	0	0	0	8	0	1	0	10	1	10	0	11	5	0	11	1	90.9091	100	45.4545
19	7	6	Actellic Mud R1	4	7	0	0	0	6	0	0	0	1	0	0	0	0	7	0	0	0	7	0	7	0	7	6	0	7	1	100	100	85.7143
20	7	6	Actellic Mud R1	4	8	0	0	0	2	0	0	0	4	0	0	0	0	5	0	0	0	6	0	6	0	6	2	0	6	1	100	100	33.3333
21	7	6	Actellic Mud R1	4	9	0	0	0	2	0	0	0	2	0	0	0	0	3	0	0	0	4	0	4	0	4	2	0	4	1	100	100	50
22	7	6	Actellic Mud R1	4	1	0	0	0	2	0	0	0	8	0	0	0	0	9	0	0	0	10	0	10	0	10	2	0	10	1	100	100	20
23	7	6	Actellic Mud R1	4	2	0	1	0	5	0	0	0	1	0	0	0	0	5	0	0	1	6	0	7	1	6	6	0	7	1	100	85.7143	85.7143
24	7	6	Actellic Mud R1	4	3	0	0	0	2	0	0	0	2	0	0	0	0	4	0	0	0	4	0	4	0	4	2	0	4	1	100	100	50
25	7	6	Actellic Mud R1	4	4	0	1	0	2	0	0	0	2	0	0	0	0	4	0	0	1	4	0	5	1	4	3	0	5	1	100	80	60
26	7	6	Actellic Mud R1	4	5	0	1	0	1	0	0	0	4	0	0	0	0	4	0	0	1	5	0	6	1	5	2	0	6	1	100	83.3333	33.3333
27	7	6	Actellic Mud R1	4	6	0	0	0	2	0	0	0	4	0	0	0	0	6	0	0	0	6	0	6	0	6	2	0	6	1	100	100	33.3333
28	7	6	Actellic Mud R1	4	7	0	0	0	3	0	0	0	1	0	0	0	0	4	0	0	0	4	0	4	0	4	3	0	4	1	100	100	75
29	7	6	Actellic Mud R1	4	8	0	0	0	9	0	0	0	4	0	0	0	0	13	0	0	0	13	0	13	0	13	9	0	13	1	100	100	69.2308
30	7	6	Actellic Mud R1	4	9	1	0	0	2	0	0	0	3	0	0	0	0	5	1	0	0	5	1	5	1	5	3	0	6	1	83.3333	83.3333	50
31	7	6	Actellic Mud R1	4	1	0	1	0	5	0	0	0	2	0	0	0	0	6	0	0	1	7	0	8	1	7	6	0	8	1	100	87.5	75
32	7	6	Actellic Mud R1	4	2	0	0	0	4	0	0	0	2	0	0	0	0	6	0	0	0	6	0	6	0	6	4	0	6	1	100	100	66.6667
33	7	6	Actellic Mud R1	4	3	0	1	1	3	0	0	0	6	0	0	0	0	10	0	1	1	9	1	10	1	10	5	0	11	1	90.9091	90.9091	45.4545
34	7	6	Actellic Mud R1	4	4	0	0	0	2	0	0	0	14	0	0	0	0	15	0	0	0	16	0	16	0	16	2	0	16	1	100	100	12.5
35	7	6	Actellic Mud R1	4	5	0	0	0	4	0	0	0	0	0	0	0	0	4	0	0	0	4	0	4	0	4	4	0	4	1	100	100	100
36	7	6	Actellic Mud R1	4	6	0	1	0	1	0	0	0	2	0	0	0	0	3	0	0	1	3	0	4	1	3	2	0	4	1	100	75	50
37	7	6	Actellic Mud R1	4	7	0	0	0	6	0	0	0	0	0	0	0	0	6	0	0	0	6	0	6	0	6	6	0	6	1	100	100	100
38	7	6	Actellic Mud R1	4	8	0	1	0	9	0	0	0	6	0	0	0	0	11	0	0	1	15	0	16	1	15	10	0	16	1	100	93.75	62.5
39	7	6	Actellic Mud R1	4	9	0	0	0	1	0	0	0	2	0	0	0	0	3	0	0	0	3	0	3	0	3	1	0	3	1	100	100	33.3333
40	7	6	Actellic Mud R1	4	1	0	0	0	4	0	0	0	5	0	0	0	0	9	0	0	0	9	0	9	0	9	4	0	9	1	100	100	44.4444
41	7	6	Actellic Mud R1	4	2	0	0	0	2	0	0	0	2	0	0	0	0	4	0	0	0	4	0	4	0	4	2	0	4	1	100	100	50
42	7	6	Actellic Mud R1	4	3	0	1	0	4	0	0	0	1	0	0	0	0	4	0	0	1	5	0	6	1	5	5	0	6	1	100	83.3333	83.3333
43	7	6	Actellic Mud R1	4	4	0	0	0	8	0	0	0	3	0	0	0	0	11	0	0	0	11	0	11	0	11	8	0	11	1	100	100	72.7273
44	7	6	Actellic Mud R1	4	5	0	3	0	10	0	0	0	18	0	0	0	0	28	0	0	3	28	0	31	3	28	13	0	31	1	100	90.3226	41.9355
45	7	6	Actellic Mud R1	4	6	0	3	0	16	0	0	0	8	0	0	0	0	18	0	0	3	24	0	27	3	24	19	0	27	1	100	88.8889	70.3704
46	7	6	Actellic Mud R1	4	7	0	2	0	7	0	0	0	4	0	0	0	0	11	0	0	2	11	0	13	2	11	9	0	13	1	100	84.6154	69.2308
47	7	6	Actellic Mud R1	4	8	0	2	0	14	0	0	0	18	0	0	0	0	29	0	0	2	32	0	34	2	32	16	0	34	1	100	94.1176	47.0588
48	7	6	Actellic Mud R1	4	9	0	1	0	19	0	0	0	7	0	0	0	0	24	0	0	1	26	0	27	1	26	20	0	27	1	100	96.2963	74.0741
49	7	6	Actellic Mud R1	4	1	1	16	1	28	0	0	0	8	0	0	0	0	29	1	1	16	36	2	52	17	37	46	0	54	1	96.2963	68.5185	85.1852
50	7	6	Actellic Mud R1	4	2	0	3	1	6	0	0	5	12	0	0	0	0	23	0	6	3	18	6	21	3	24	10	0	27	1	77.7778	88.8889	37.037
51	7	6	Actellic Mud R1	4	3	0	8	0	22	0	0	0	17	0	0	0	0	31	0	0	8	39	0	47	8	39	30	0	47	1	100	82.9787	63.8298
52	7	6	Actellic Mud R1	4	4	0	11	0	7	0	0	0	17	0	0	0	0	18	0	0	11	24	0	35	11	24	18	0	35	1	100	68.5714	51.4286
53	7	6	Actellic Mud R1	4	5	0	1	4	13	0	0	0	8	0	0	0	0	23	0	4	1	21	4	22	1	25	18	0	26	1	84.6154	96.1538	69.2308
54	7	6	Actellic Mud R1	4	6	0	1	0	23	0	0	3	33	0	0	0	0	52	0	3	1	56	3	57	1	59	24	0	60	1	95	98.3333	40
67	7	6	Actellic Mud R1	4	7	0	0	0	3	0	0	1	1	0	0	0	0	5	0	1	0	4	1	4	0	5	3	0	5	1	80	100	60
68	7	6	Actellic Mud R1	4	8	0	0	3	16	0	0	2	9	0	0	0	0	25	0	5	0	25	5	25	0	30	19	0	30	1	83.3333	100	63.3333
69	7	6	Actellic Mud R1	4	9	0	0	0	6	0	0	0	2	0	0	0	0	2	0	0	0	8	0	8	0	8	6	0	8	1	100	100	75
70	7	6	Actellic Mud R1	4	1	0	2	0	25	0	0	0	15	0	0	0	0	39	0	0	2	40	0	42	2	40	27	0	42	1	100	95.2381	64.2857
71	7	6	Actellic Mud R1	4	2	0	2	0	2	0	0	2	22	0	0	0	0	24	0	2	2	24	2	26	2	26	4	0	28	1	92.8571	92.8571	14.2857
72	7	6	Actellic Mud R1	4	3	0	4	0	11	0	0	0	14	0	0	0	0	23	0	0	4	25	0	29	4	25	15	0	29	1	100	86.2069	51.7241
73	7	6	Actellic Mud R1	4	4	0	0	1	11	0	0	1	12	0	0	0	0	25	0	2	0	23	2	23	0	25	12	0	25	1	92	100	48
74	7	6	Actellic Mud R1	4	5	0	2	1	0	0	0	2	18	0	0	0	0	21	0	3	2	18	3	20	2	21	3	0	23	1	86.9565	91.3043	13.0435
75	7	6	Actellic Mud R1	4	6	0	4	0	4	0	0	1	15	0	0	0	0	19	0	1	4	19	1	23	4	20	8	0	24	1	95.8333	83.3333	33.3333
76	7	6	Actellic Mud R1	4	7	0	0	0	4	0	0	1	14	0	0	0	0	19	0	1	0	18	1	18	0	19	4	0	19	1	94.7368	100	21.0526
77	7	6	Actellic Mud R1	4	8	0	0	2	17	0	0	2	3	0	0	0	0	24	0	4	0	20	4	20	0	24	19	0	24	1	83.3333	100	79.1667
78	7	6	Actellic Mud R1	4	9	0	1	0	5	0	0	0	13	0	0	0	0	15	0	0	1	18	0	19	1	18	6	0	19	1	100	94.7368	31.5789
79	7	6	Actellic Mud R1	4	1	0	2	0	1	0	0	1	10	0	0	0	0	11	0	1	2	11	1	13	2	12	3	0	14	1	92.8571	85.7143	21.4286
80	7	6	Actellic Mud R1	4	2	0	1	2	9	0	0	0	30	0	0	0	0	36	0	2	1	39	2	40	1	41	12	0	42	1	95.2381	97.619	28.5714
81	7	6	Actellic Mud R1	4	3	0	2	0	1	0	0	0	12	0	0	0	0	12	0	0	2	13	0	15	2	13	3	0	15	1	100	86.6667	20
82	7	6	Actellic Mud R1	4	4	0	3	0	1	0	0	2	21	0	0	0	0	24	0	2	3	22	2	25	3	24	4	0	27	1	92.5926	88.8889	14.8148
83	7	6	Actellic Mud R1	4	5	0	8	0	3	0	0	0	1	0	0	0	0	2	0	0	8	4	0	12	8	4	11	0	12	1	100	33.3333	91.6667
84	7	6	Actellic Mud R1	4	6	0	0	0	2	0	0	2	6	0	0	0	0	9	0	2	0	8	2	8	0	10	2	0	10	1	80	100	20
85	7	6	Actellic Mud R1	4	7	0	1	0	2	0	0	0	2	0	0	0	0	3	0	0	1	4	0	5	1	4	3	0	5	1	100	80	60
86	7	6	Actellic Mud R1	4	8	0	0	1	0	0	0	1	0	0	0	0	0	2	0	2	0	0	2	0	0	2	1	0	2	1	0	100	50
87	7	6	Actellic Mud R1	4	9	0	0	0	1	0	0	0	0	0	0	0	0	0	0	0	0	1	0	1	0	1	1	0	1	1	100	100	100
88	7	6	Actellic Mud R1	4	1	0	5	0	3	0	0	0	4	0	0	0	0	5	0	0	5	7	0	12	5	7	8	0	12	1	100	58.3333	66.6667
89	7	6	Actellic Mud R1	4	2	0	0	0	8	0	0	0	24	0	0	0	0	30	0	0	0	32	0	32	0	32	8	0	32	1	100	100	25
90	7	6	Actellic Mud R1	4	3	0	2	0	3	0	0	1	10	0	0	0	0	14	0	1	2	13	1	15	2	14	5	0	16	1	93.75	87.5	31.25
91	7	6	Actellic Mud R1	4	4	0	3	0	2	0	0	1	11	0	0	0	0	14	0	1	3	13	1	16	3	14	5	0	17	1	94.1176	82.3529	29.4118
92	7	6	Actellic Mud R1	4	5	0	3	0	5	0	0	0	0	0	0	0	0	4	0	0	3	5	0	8	3	5	8	0	8	1	100	62.5	100
93	7	6	Actellic Mud R1	4	6	0	11	0	7	0	0	0	12	0	0	0	0	19	0	0	11	19	0	30	11	19	18	0	30	1	100	63.3333	60
94	7	6	Actellic Mud R1	4	7	0	3	2	1	0	0	0	12	0	0	0	0	15	0	2	3	13	2	16	3	15	6	0	18	1	88.8889	83.3333	33.3333
95	7	6	Actellic Mud R1	4	8	0	2	0	4	0	0	0	3	0	0	0	0	5	0	0	2	7	0	9	2	7	6	0	9	1	100	77.7778	66.6667
96	7	6	Actellic Mud R1	4	9	0	2	0	1	0	0	0	18	0	0	0	0	18	0	0	2	19	0	21	2	19	3	0	21	1	100	90.4762	14.2857
97	7	6	Actellic Mud R1	4	1	0	5	0	2	0	0	0	8	0	0	0	0	8	0	0	5	10	0	15	5	10	7	0	15	1	100	66.6667	46.6667
98	7	6	Actellic Mud R1	4	2	0	2	0	1	0	0	0	6	0	0	0	0	6	0	0	2	7	0	9	2	7	3	0	9	1	100	77.7778	33.3333
99	7	6	Actellic Mud R1	4	3	0	2	0	10	0	0	0	9	0	0	0	0	17	0	0	2	19	0	21	2	19	12	0	21	1	100	90.4762	57.1429
100	7	6	Actellic Mud R1	4	4	0	1	0	4	0	0	0	4	0	0	0	0	7	0	0	1	8	0	9	1	8	5	0	9	1	100	88.8889	55.5556
101	7	6	Actellic Mud R1	4	5	0	2	0	0	0	0	0	3	0	0	0	0	3	0	0	2	3	0	5	2	3	2	0	5	1	100	60	40
102	7	6	Actellic Mud R1	4	6	0	8	0	2	0	0	0	2	0	0	0	0	3	0	0	8	4	0	12	8	4	10	0	12	1	100	33.3333	83.3333
103	7	6	Actellic Mud R1	4	7	0	1	0	2	0	0	0	9	0	0	0	0	9	0	0	1	11	0	12	1	11	3	0	12	1	100	91.6667	25
104	7	6	Actellic Mud R1	4	8	0	0	0	3	0	0	0	2	0	0	0	0	4	0	0	0	5	0	5	0	5	3	0	5	1	100	100	60
105	7	6	Actellic Mud R1	4	9	0	1	0	0	0	0	0	0	0	0	0	0	0	0	0	1	0	0	1	1	0	1	0	1	1	100	0	100
106	7	6	Actellic Mud R1	4	1	0	4	0	1	0	0	0	10	0	0	0	0	11	0	0	4	11	0	15	4	11	5	0	15	1	100	73.3333	33.3333
107	7	6	Actellic Mud R1	4	2	0	0	0	2	0	0	0	9	0	0	0	0	11	0	0	0	11	0	11	0	11	2	0	11	1	100	100	18.1818
108	7	6	Actellic Mud R1	4	3	0	1	0	8	0	0	0	2	0	0	0	0	6	0	0	1	10	0	11	1	10	9	0	11	1	100	90.9091	81.8182
109	7	6	Actellic Mud R1	4	4	0	1	0	12	0	0	0	0	0	0	0	0	8	0	0	1	12	0	13	1	12	13	0	13	1	100	92.3077	100
110	7	6	Actellic Mud R1	4	5	0	0	0	6	0	0	0	0	0	0	0	0	3	0	0	0	6	0	6	0	6	6	0	6	1	100	100	100
111	7	6	Actellic Mud R1	4	6	0	0	0	3	0	0	0	4	0	0	0	0	6	0	0	0	7	0	7	0	7	3	0	7	1	100	100	42.8571
112	7	6	Actellic Mud R1	4	7	0	0	0	7	0	0	0	5	0	0	0	0	10	0	0	0	12	0	12	0	12	7	0	12	1	100	100	58.3333
113	7	6	Actellic Mud R1	4	8	0	0	0	4	0	0	0	0	0	0	0	0	4	0	0	0	4	0	4	0	4	4	0	4	1	100	100	100
114	7	6	Actellic Mud R1	4	9	0	0	0	0	0	0	0	4	0	0	0	0	4	0	0	0	4	0	4	0	4	0	0	4	1	100	100	0
115	7	6	Actellic Mud R1	4	1	0	0	0	3	0	0	0	6	0	0	0	0	8	0	0	0	9	0	9	0	9	3	0	9	1	100	100	33.3333
116	7	6	Actellic Mud R1	4	2	0	2	0	4	0	0	0	6	0	0	0	0	9	0	0	2	10	0	12	2	10	6	0	12	1	100	83.3333	50
117	7	6	Actellic Mud R1	4	3	0	0	0	3	0	0	0	0	0	0	0	0	2	0	0	0	3	0	3	0	3	3	0	3	1	100	100	100
118	7	6	Actellic Mud R1	4	4	0	5	0	2	0	0	0	0	0	0	0	0	2	0	0	5	2	0	7	5	2	7	0	7	1	100	28.5714	100
119	7	6	Actellic Mud R1	4	5	1	3	0	2	0	0	0	0	0	0	0	0	2	1	0	3	2	1	5	4	2	6	0	6	1	83.3333	33.3333	100
120	7	6	Actellic Mud R1	4	6	0	6	0	11	0	0	0	0	0	0	0	0	4	0	0	6	11	0	17	6	11	17	0	17	1	100	64.7059	100
121	7	6	Actellic Mud R1	4	7	0	1	0	4	0	0	0	8	0	0	0	0	12	0	0	1	12	0	13	1	12	5	0	13	1	100	92.3077	38.4615
122	7	6	Actellic Mud R1	4	8	0	0	0	5	0	0	0	0	0	0	0	0	3	0	0	0	5	0	5	0	5	5	0	5	1	100	100	100
123	7	6	Actellic Mud R1	4	9	0	1	0	0	0	0	0	3	0	0	0	0	3	0	0	1	3	0	4	1	3	1	0	4	1	100	75	25
124	7	6	Actellic Mud R1	4	1	0	1	0	0	0	0	0	0	0	0	0	0	0	0	0	1	0	0	1	1	0	1	0	1	1	100	0	100
125	7	6	Actellic Mud R1	4	2	0	4	0	0	0	0	0	0	0	0	0	0	0	0	0	4	0	0	4	4	0	4	0	4	1	100	0	100
126	7	6	Actellic Mud R1	4	3	0	0	0	2	0	0	0	2	0	0	0	0	2	0	0	0	4	0	4	0	4	2	0	4	1	100	100	50
127	7	6	Actellic Mud R1	4	4	1	1	0	4	0	0	0	0	0	0	0	0	0	1	0	1	4	1	5	2	4	6	0	6	1	83.3333	66.6667	100
128	7	6	Actellic Mud R1	4	5	0	3	0	1	0	0	0	0	0	0	0	0	1	0	0	3	1	0	4	3	1	4	0	4	1	100	25	100
129	7	6	Actellic Mud R1	4	6	0	4	0	3	0	0	0	1	0	0	0	0	3	0	0	4	4	0	8	4	4	7	0	8	1	100	50	87.5
130	7	6	Actellic Mud R1	4	7	0	3	0	3	0	0	0	7	0	0	0	0	9	0	0	3	10	0	13	3	10	6	0	13	1	100	76.9231	46.1538
131	7	6	Actellic Mud R1	4	8	0	2	0	5	0	0	0	1	0	0	0	0	4	0	0	2	6	0	8	2	6	7	0	8	1	100	75	87.5
132	7	6	Actellic Mud R1	4	9	0	4	0	3	0	0	0	3	0	0	0	0	6	0	0	4	6	0	10	4	6	7	0	10	1	100	60	70
133	7	6	Actellic Mud R1	4	1	0	5	0	2	0	0	0	8	0	0	0	0	10	0	0	5	10	0	15	5	10	7	0	15	1	100	66.6667	46.6667
134	7	6	Actellic Mud R1	4	2	0	3	0	5	0	0	0	1	0	0	0	0	4	0	0	3	6	0	9	3	6	8	0	9	1	100	66.6667	88.8889
135	7	6	Actellic Mud R1	4	3	1	1	0	6	0	0	0	5	0	0	0	0	8	1	0	1	11	1	12	2	11	8	0	13	1	92.3077	84.6154	61.5385
136	7	6	Actellic Mud R1	4	4	0	11	0	3	0	0	0	8	0	0	0	0	10	0	0	11	11	0	22	11	11	14	0	22	1	100	50	63.6364
137	7	6	Actellic Mud R1	4	5	0	0	0	5	0	0	0	1	0	0	0	0	1	0	0	0	6	0	6	0	6	5	0	6	1	100	100	83.3333
138	7	6	Actellic Mud R1	4	6	0	3	0	2	0	0	0	1	0	0	0	0	1	0	0	3	3	0	6	3	3	5	0	6	1	100	50	83.3333
139	7	6	Actellic Mud R1	4	7	0	0	0	5	0	0	0	3	0	0	0	0	7	0	0	0	8	0	8	0	8	5	0	8	1	100	100	62.5
140	7	6	Actellic Mud R1	4	8	0	2	0	0	0	0	0	2	0	0	0	0	2	0	0	2	2	0	4	2	2	2	0	4	1	100	50	50
141	7	6	Actellic Mud R1	4	9	0	2	0	1	0	0	0	13	0	0	0	0	13	0	0	2	14	0	16	2	14	3	0	16	1	100	87.5	18.75
142	7	6	Actellic Mud R1	4	1	0	4	0	4	0	0	0	4	0	0	0	0	6	0	0	4	8	0	12	4	8	8	0	12	1	100	66.6667	66.6667
143	7	6	Actellic Mud R1	4	2	0	5	0	1	0	0	0	7	0	0	0	0	7	0	0	5	8	0	13	5	8	6	0	13	1	100	61.5385	46.1538
144	7	6	Actellic Mud R1	4	3	0	3	0	2	0	0	0	7	0	0	0	0	8	0	0	3	9	0	12	3	9	5	0	12	1	100	75	41.6667
145	7	6	Actellic Mud R1	4	4	0	4	0	0	0	0	0	6	0	0	0	0	6	0	0	4	6	0	10	4	6	4	0	10	1	100	60	40
146	7	6	Actellic Mud R1	4	5	0	7	1	0	0	0	0	0	0	0	0	0	0	0	1	7	0	1	7	7	1	8	0	8	1	87.5	12.5	100
147	7	6	Actellic Mud R1	4	6	0	1	0	1	0	0	0	0	0	0	0	0	1	0	0	1	1	0	2	1	1	2	0	2	1	100	50	100
148	7	6	Actellic Mud R1	4	7	0	8	0	0	0	0	0	0	0	0	0	0	0	0	0	8	0	0	8	8	0	8	0	8	1	100	0	100
149	7	6	Actellic Mud R1	4	8	0	2	0	5	0	0	0	0	0	0	0	0	5	0	0	2	5	0	7	2	5	7	0	7	1	100	71.4286	100
150	7	6	Actellic Mud R1	4	9	0	4	0	0	0	0	0	0	0	0	0	0	0	0	0	4	0	0	4	4	0	4	0	4	1	100	0	100
151	7	6	Actellic Mud R1	4	1	0	3	0	0	0	0	0	5	0	0	0	0	5	0	0	3	5	0	8	3	5	3	0	8	1	100	62.5	37.5
152	7	6	Actellic Mud R1	4	2	0	1	0	2	0	0	0	4	0	0	0	0	6	0	0	1	6	0	7	1	6	3	0	7	1	100	85.7143	42.8571
153	7	6	Actellic Mud R1	4	3	0	2	0	4	0	0	0	3	0	0	0	0	4	0	0	2	7	0	9	2	7	6	0	9	1	100	77.7778	66.6667
154	7	6	Actellic Mud R1	4	4	0	6	0	1	0	0	0	6	0	0	0	0	7	0	0	6	7	0	13	6	7	7	0	13	1	100	53.8462	53.8462
155	7	6	Actellic Mud R1	4	5	0	1	0	2	0	0	0	0	0	0	0	0	2	0	0	1	2	0	3	1	2	3	0	3	1	100	66.6667	100
156	7	6	Actellic Mud R1	4	6	0	3	0	4	0	0	0	3	0	0	0	0	7	0	0	3	7	0	10	3	7	7	0	10	1	100	70	70
157	7	6	Actellic Mud R1	4	7	1	6	0	0	0	0	0	4	0	0	0	0	4	1	0	6	4	1	10	7	4	7	0	11	1	90.9091	36.3636	63.6364
158	7	6	Actellic Mud R1	4	8	0	6	0	5	0	0	0	0	0	0	0	0	5	0	0	6	5	0	11	6	5	11	0	11	1	100	45.4545	100
159	7	6	Actellic Mud R1	4	9	0	6	0	1	0	0	0	5	0	0	0	0	6	0	0	6	6	0	12	6	6	7	0	12	1	100	50	58.3333
160	7	6	Actellic Mud R1	4	1	0	7	0	5	0	0	0	4	0	0	0	0	8	0	0	7	9	0	16	7	9	12	0	16	1	100	56.25	75
161	7	6	Actellic Mud R1	4	2	0	12	0	0	0	0	0	12	0	0	0	0	12	0	0	12	12	0	24	12	12	12	0	24	1	100	50	50
162	7	6	Actellic Mud R1	4	3	0	5	0	3	0	0	0	7	0	0	0	0	9	0	0	5	10	0	15	5	10	8	0	15	1	100	66.6667	53.3333
163	7	6	Actellic Mud R1	4	4	0	4	0	0	0	0	0	5	0	0	0	0	5	0	0	4	5	0	9	4	5	4	0	9	1	100	55.5556	44.4444
164	7	6	Actellic Mud R1	4	5	0	6	0	3	0	0	0	0	0	0	0	0	3	0	0	6	3	0	9	6	3	9	0	9	1	100	33.3333	100
165	7	6	Actellic Mud R1	4	6	0	8	0	2	0	0	0	3	0	0	0	0	5	0	0	8	5	0	13	8	5	10	0	13	1	100	38.4615	76.9231
166	7	6	Actellic Mud R1	4	7	0	4	0	4	0	0	0	5	0	0	0	0	9	0	0	4	9	0	13	4	9	8	0	13	1	100	69.2308	61.5385
167	7	6	Actellic Mud R1	4	8	0	1	0	0	0	0	0	3	0	0	0	0	3	0	0	1	3	0	4	1	3	1	0	4	1	100	75	25
168	7	6	Actellic Mud R1	4	9	0	8	0	2	0	0	0	2	0	0	0	0	4	0	0	8	4	0	12	8	4	10	0	12	1	100	33.3333	83.3333
169	7	6	Actellic Mud R1	4	1	0	3	0	2	0	0	0	7	0	0	0	0	9	0	0	3	9	0	12	3	9	5	0	12	1	100	75	41.6667
170	7	6	Actellic Mud R1	4	2	0	11	0	1	0	0	0	10	0	0	0	0	11	0	0	11	11	0	22	11	11	12	0	22	1	100	50	54.5455
171	7	6	Actellic Mud R1	4	3	0	5	0	3	0	0	0	8	0	0	0	0	11	0	0	5	11	0	16	5	11	8	0	16	1	100	68.75	50
172	7	6	Actellic Mud R1	4	4	0	7	0	3	0	0	0	7	0	0	0	0	10	0	0	7	10	0	17	7	10	10	0	17	1	100	58.8235	58.8235
173	7	6	Actellic Mud R1	4	5	0	11	0	4	0	0	0	0	0	0	0	0	4	0	0	11	4	0	15	11	4	15	0	15	1	100	26.6667	100
174	7	6	Actellic Mud R1	4	6	0	31	0	4	0	0	0	11	0	0	0	0	15	0	0	31	15	0	46	31	15	35	0	46	1	100	32.6087	76.087
175	7	6	Actellic Mud R1	4	7	0	6	0	6	0	0	0	28	0	0	0	0	34	0	0	6	34	0	40	6	34	12	0	40	1	100	85	30
176	7	6	Actellic Mud R1	4	8	0	13	0	9	0	0	0	4	0	0	0	0	12	0	0	13	13	0	26	13	13	22	0	26	1	100	50	84.6154
177	7	6	Actellic Mud R1	4	9	0	12	0	5	0	0	0	8	0	0	0	0	13	0	0	12	13	0	25	12	13	17	0	25	1	100	52	68
178	7	6	Actellic Mud R1	4	1	0	11	0	5	0	0	0	7	0	0	0	0	12	0	0	11	12	0	23	11	12	16	0	23	1	100	52.1739	69.5652
179	7	6	Actellic Mud R1	4	2	0	2	0	0	0	0	1	11	0	0	0	0	12	0	1	2	11	1	13	2	12	2	0	14	1	92.8571	85.7143	14.2857
180	7	6	Actellic Mud R1	4	3	0	11	0	1	0	0	0	11	0	0	0	0	11	0	0	11	12	0	23	11	12	12	0	23	1	100	52.1739	52.1739
181	7	6	Actellic Mud R1	4	4	0	7	0	1	0	0	0	4	0	0	0	0	5	0	0	7	5	0	12	7	5	8	0	12	1	100	41.6667	66.6667
182	7	6	Actellic Mud R1	4	5	0	5	0	4	0	0	0	0	0	0	0	0	3	0	0	5	4	0	9	5	4	9	0	9	1	100	44.4444	100
183	7	6	Actellic Mud R1	4	6	0	4	0	2	0	0	0	2	0	0	0	0	4	0	0	4	4	0	8	4	4	6	0	8	1	100	50	75
184	7	6	Actellic Mud R1	4	7	0	3	0	2	0	0	0	9	0	0	0	0	11	0	0	3	11	0	14	3	11	5	0	14	1	100	78.5714	35.7143
185	7	6	Actellic Mud R1	4	8	0	1	0	2	0	0	0	0	0	0	0	0	2	0	0	1	2	0	3	1	2	3	0	3	1	100	66.6667	100
186	7	6	Actellic Mud R1	4	9	0	6	0	1	0	0	0	0	0	0	0	0	1	0	0	6	1	0	7	6	1	7	0	7	1	100	14.2857	100
187	7	6	Actellic Mud R1	4	1	0	1	0	3	0	0	0	0	0	0	0	0	3	0	0	1	3	0	4	1	3	4	0	4	1	100	75	100
188	7	6	Actellic Mud R1	4	2	0	10	0	2	0	0	0	13	0	0	0	0	13	0	0	10	15	0	25	10	15	12	0	25	1	100	60	48
189	7	6	Actellic Mud R1	4	3	2	15	0	3	0	0	0	10	0	0	0	0	13	2	0	15	13	2	28	17	13	20	0	30	1	93.3333	43.3333	66.6667
190	7	6	Actellic Mud R1	4	4	0	10	0	1	0	0	0	4	0	0	0	0	5	0	0	10	5	0	15	10	5	11	0	15	1	100	33.3333	73.3333
191	7	6	Actellic Mud R1	4	5	0	3	0	3	0	0	0	0	0	0	0	0	3	0	0	3	3	0	6	3	3	6	0	6	1	100	50	100
192	7	6	Actellic Mud R1	4	6	0	8	0	5	0	0	0	8	0	0	0	0	13	0	0	8	13	0	21	8	13	13	0	21	1	100	61.9048	61.9048
193	7	6	Actellic Mud R1	4	7	0	1	0	2	0	0	0	7	0	0	0	0	9	0	0	1	9	0	10	1	9	3	0	10	1	100	90	30
194	7	6	Actellic Mud R1	4	8	0	0	0	0	0	0	0	5	0	0	0	0	5	0	0	0	5	0	5	0	5	0	0	5	1	100	100	0
195	7	6	Actellic Mud R1	4	9	0	1	0	1	0	0	0	7	0	0	0	0	8	0	0	1	8	0	9	1	8	2	0	9	1	100	88.8889	22.2222
196	7	6	Actellic Mud R1	4	1	0	3	0	2	0	0	0	2	0	0	0	0	4	0	0	3	4	0	7	3	4	5	0	7	1	100	57.1429	71.4286
197	7	6	Actellic Mud R1	4	2	0	5	0	0	0	0	0	9	0	0	0	0	9	0	0	5	9	0	14	5	9	5	0	14	1	100	64.2857	35.7143
198	7	6	Actellic Mud R1	4	3	0	8	1	9	0	0	0	10	0	0	0	0	19	0	1	8	19	1	27	8	20	18	0	28	1	96.4286	71.4286	64.2857
199	7	6	Actellic Mud R1	4	4	0	4	0	2	0	0	0	6	0	0	0	0	8	0	0	4	8	0	12	4	8	6	0	12	1	100	66.6667	50
200	7	6	Actellic Mud R1	4	5	0	0	1	4	0	0	0	0	0	0	0	0	3	0	1	0	4	1	4	0	5	5	0	5	1	80	100	100
201	7	6	Actellic Mud R1	4	6	0	1	0	4	0	0	0	0	0	0	0	0	4	0	0	1	4	0	5	1	4	5	0	5	1	100	80	100
202	7	6	Actellic Mud R1	4	7	0	0	0	0	0	0	0	1	0	0	0	0	1	0	0	0	1	0	1	0	1	0	0	1	1	100	100	0
204	7	6	Actellic Mud R1	4	9	0	2	0	1	0	0	0	4	0	0	0	0	5	0	0	2	5	0	7	2	5	3	0	7	1	100	71.4286	42.8571
205	7	6	Actellic Mud R1	4	1	0	4	0	1	0	0	0	9	0	0	0	0	9	0	0	4	10	0	14	4	10	5	0	14	1	100	71.4286	35.7143
206	7	6	Actellic Mud R1	4	2	0	1	0	0	0	0	0	9	0	0	0	0	9	0	0	1	9	0	10	1	9	1	0	10	1	100	90	10
207	7	6	Actellic Mud R1	4	3	0	7	0	0	0	0	0	2	0	0	0	0	2	0	0	7	2	0	9	7	2	7	0	9	1	100	22.2222	77.7778
208	7	6	Actellic Mud R1	4	4	0	2	0	1	0	0	0	2	0	0	0	0	3	0	0	2	3	0	5	2	3	3	0	5	1	100	60	60
209	7	6	Actellic Mud R1	4	5	0	1	0	0	0	0	0	0	0	0	0	0	0	0	0	1	0	0	1	1	0	1	0	1	1	100	0	100
210	7	6	Actellic Mud R1	4	6	0	1	0	0	0	0	0	0	0	0	0	0	0	0	0	1	0	0	1	1	0	1	0	1	1	100	0	100
211	7	6	Actellic Mud R1	4	7	0	0	0	0	0	0	0	2	0	0	0	0	2	0	0	0	2	0	2	0	2	0	0	2	1	100	100	0
212	7	6	Actellic Mud R1	4	8	0	1	0	2	0	0	0	0	0	0	0	0	2	0	0	1	2	0	3	1	2	3	0	3	1	100	66.6667	100
213	7	6	Actellic Mud R1	4	9	0	1	0	0	0	0	0	2	0	0	0	0	2	0	0	1	2	0	3	1	2	1	0	3	1	100	66.6667	33.3333
214	7	6	Actellic Mud R1	4	1	0	6	0	1	0	0	0	2	0	0	0	0	3	0	0	6	3	0	9	6	3	7	0	9	1	100	33.3333	77.7778
215	7	6	Actellic Mud R1	4	2	0	1	0	2	0	0	0	1	0	0	0	0	3	0	0	1	3	0	4	1	3	3	0	4	1	100	75	75
216	7	6	Actellic Mud R1	4	3	0	2	0	0	0	0	0	3	0	0	0	0	3	0	0	2	3	0	5	2	3	2	0	5	1	100	60	40
218	7	6	Actellic Mud R1	4	5	1	0	0	1	0	0	0	0	0	0	0	0	1	1	0	0	1	1	1	1	1	2	0	2	1	50	50	100
219	7	6	Actellic Mud R1	4	6	0	0	0	0	0	0	0	4	0	0	0	0	4	0	0	0	4	0	4	0	4	0	0	4	1	100	100	0
220	7	6	Actellic Mud R1	4	7	0	1	0	0	0	0	0	2	0	0	0	0	2	0	0	1	2	0	3	1	2	1	0	3	1	100	66.6667	33.3333
223	7	6	Actellic Mud R1	4	1	0	1	0	0	0	0	0	1	0	0	0	0	1	0	0	1	1	0	2	1	1	1	0	2	1	100	50	50
224	7	6	Actellic Mud R1	4	2	0	1	0	0	0	0	0	0	0	0	0	0	0	0	0	1	0	0	1	1	0	1	0	1	1	100	0	100
225	7	6	Actellic Mud R1	4	3	2	0	0	0	0	0	0	1	0	0	0	0	1	2	0	0	1	2	1	2	1	2	0	3	1	33.3333	33.3333	66.6667
226	7	6	Actellic Mud R1	4	4	0	1	0	0	0	0	0	2	0	0	0	0	2	0	0	1	2	0	3	1	2	1	0	3	1	100	66.6667	33.3333
228	7	6	Actellic Mud R1	4	6	0	4	0	0	0	0	0	2	0	0	0	0	2	0	0	4	2	0	6	4	2	4	0	6	1	100	33.3333	66.6667
229	7	6	Actellic Mud R1	4	7	0	0	0	1	0	0	0	1	0	0	0	0	1	0	0	0	2	0	2	0	2	1	0	2	1	100	100	50
230	7	6	Actellic Mud R1	4	8	1	0	0	0	0	0	0	0	0	0	0	0	0	1	0	0	0	1	0	1	0	1	0	1	1	0	0	100
231	7	6	Actellic Mud R1	4	9	0	1	0	0	0	0	0	0	0	0	0	0	0	0	0	1	0	0	1	1	0	1	0	1	1	100	0	100
233	7	6	Actellic Mud R1	4	2	0	2	0	0	0	0	0	0	0	0	0	0	0	0	0	2	0	0	2	2	0	2	0	2	1	100	0	100
234	7	6	Actellic Mud R1	4	3	0	2	0	0	0	0	0	0	0	0	0	0	0	0	0	2	0	0	2	2	0	2	0	2	1	100	0	100
235	7	6	Actellic Mud R1	4	4	0	2	0	0	0	0	0	3	0	0	0	0	3	0	0	2	3	0	5	2	3	2	0	5	1	100	60	40
237	7	6	Actellic Mud R1	4	6	0	0	0	0	0	0	0	1	0	0	0	0	1	0	0	0	1	0	1	0	1	0	0	1	1	100	100	0
240	7	6	Actellic Mud R1	4	9	0	1	0	0	0	0	0	0	0	0	0	0	0	0	0	1	0	0	1	1	0	1	0	1	1	100	0	100
253	7	6	Actellic Mud R1	4	4	0	0	0	0	0	0	0	1	0	0	0	0	1	0	0	0	1	0	1	0	1	0	0	1	1	100	100	0
254	7	6	Actellic Mud R1	4	5	0	0	0	0	0	0	0	1	0	0	0	0	1	0	0	0	1	0	1	0	1	0	0	1	1	100	100	0
256	7	6	Actellic Mud R1	4	7	0	1	0	0	0	0	0	0	0	0	0	0	0	0	0	1	0	0	1	1	0	1	0	1	1	100	0	100
260	7	6	Actellic Mud R1	4	2	0	1	0	0	0	0	0	0	0	0	0	0	0	0	0	1	0	0	1	1	0	1	0	1	1	100	0	100
261	7	6	Actellic Mud R1	4	3	0	1	0	0	0	0	0	0	0	0	0	0	0	0	0	1	0	0	1	1	0	1	0	1	1	100	0	100
262	7	6	Actellic Mud R1	4	4	0	4	0	0	0	0	0	0	0	0	0	0	0	0	0	4	0	0	4	4	0	4	0	4	1	100	0	100
263	7	6	Actellic Mud R1	4	5	0	1	0	0	0	0	0	0	0	0	0	0	0	0	0	1	0	0	1	1	0	1	0	1	1	100	0	100
264	7	6	Actellic Mud R1	4	6	0	3	0	0	0	0	0	0	0	0	0	0	0	0	0	3	0	0	3	3	0	3	0	3	1	100	0	100
266	7	6	Actellic Mud R1	4	8	0	2	0	0	0	0	0	0	0	0	0	0	0	0	0	2	0	0	2	2	0	2	0	2	1	100	0	100
269	7	6	Actellic Mud R1	4	2	1	1	0	0	0	0	0	2	0	0	0	0	2	1	0	1	2	1	3	2	2	2	0	4	1	75	50	50
270	7	6	Actellic Mud R1	4	3	0	1	0	0	0	0	0	0	0	0	0	0	0	0	0	1	0	0	1	1	0	1	0	1	1	100	0	100
272	7	6	Actellic Mud R1	4	5	0	2	0	1	0	0	0	0	0	0	0	0	0	0	0	2	1	0	3	2	1	3	0	3	1	100	33.3333	100
273	7	6	Actellic Mud R1	4	6	0	1	0	0	0	0	0	0	0	0	0	0	0	0	0	1	0	0	1	1	0	1	0	1	1	100	0	100
274	7	6	Actellic Mud R1	4	7	0	2	0	0	0	0	0	0	0	0	0	0	0	0	0	2	0	0	2	2	0	2	0	2	1	100	0	100
275	7	6	Actellic Mud R1	4	8	0	2	0	0	0	0	0	0	0	0	0	0	0	0	0	2	0	0	2	2	0	2	0	2	1	100	0	100
276	7	6	Actellic Mud R1	4	9	0	1	0	0	0	0	0	0	0	0	0	0	0	0	0	1	0	0	1	1	0	1	0	1	1	100	0	100
277	7	6	Actellic Mud R1	4	1	1	0	0	0	0	0	0	0	0	0	0	0	0	1	0	0	0	1	0	1	0	1	0	1	1	0	0	100
281	7	6	Actellic Mud R1	4	5	2	1	1	0	0	0	0	0	0	0	0	0	1	2	1	1	0	3	1	3	1	4	0	4	1	25	25	100
282	7	6	Actellic Mud R1	4	6	0	2	0	0	0	0	0	0	0	0	0	0	0	0	0	2	0	0	2	2	0	2	0	2	1	100	0	100
283	7	6	Actellic Mud R1	4	7	0	2	0	0	0	0	0	0	0	0	0	0	0	0	0	2	0	0	2	2	0	2	0	2	1	100	0	100
285	7	6	Actellic Mud R1	4	9	0	1	0	0	0	0	0	0	0	0	0	0	0	0	0	1	0	0	1	1	0	1	0	1	1	100	0	100
286	7	6	Actellic Mud R1	4	1	0	4	0	0	0	0	0	0	0	0	0	0	0	0	0	4	0	0	4	4	0	4	0	4	1	100	0	100
288	7	6	Actellic Mud R1	4	3	0	2	0	0	0	0	0	0	0	0	0	0	0	0	0	2	0	0	2	2	0	2	0	2	1	100	0	100
2	8	7	Pirikool Mud R2	3	9	0	0	0	2	0	0	0	0	0	0	0	0	2	0	0	0	2	0	2	0	2	2	0	2	1	100	100	100
3	8	7	Pirikool Mud R2	3	1	0	0	0	0	0	0	2	1	0	0	0	0	3	0	2	0	1	2	1	0	3	0	0	3	1	33.3333	100	0
4	8	7	Pirikool Mud R2	3	2	0	0	0	0	0	0	0	1	0	0	0	0	1	0	0	0	1	0	1	0	1	0	0	1	1	100	100	0
5	8	7	Pirikool Mud R2	3	3	0	0	0	2	0	0	0	6	0	0	0	0	8	0	0	0	8	0	8	0	8	2	0	8	1	100	100	25
6	8	7	Pirikool Mud R2	3	4	0	0	0	0	0	1	0	1	0	0	0	0	0	0	0	1	1	0	2	1	1	0	0	2	1	100	50	0
7	8	7	Pirikool Mud R2	3	5	0	0	0	2	0	0	0	1	0	0	0	0	2	0	0	0	3	0	3	0	3	2	0	3	1	100	100	66.6667
8	8	7	Pirikool Mud R2	3	6	0	0	0	9	0	0	0	5	0	0	0	0	13	0	0	0	14	0	14	0	14	9	0	14	1	100	100	64.2857
9	8	7	Pirikool Mud R2	3	7	0	0	0	4	0	0	0	0	0	0	0	0	4	0	0	0	4	0	4	0	4	4	0	4	1	100	100	100
10	8	7	Pirikool Mud R2	3	8	0	0	0	1	0	0	0	8	0	0	0	0	8	0	0	0	9	0	9	0	9	1	0	9	1	100	100	11.1111
11	8	7	Pirikool Mud R2	3	9	0	0	0	5	0	0	0	3	0	0	0	0	4	0	0	0	8	0	8	0	8	5	0	8	1	100	100	62.5
12	8	7	Pirikool Mud R2	3	1	0	0	0	1	0	0	0	2	0	0	0	0	3	0	0	0	3	0	3	0	3	1	0	3	1	100	100	33.3333
13	8	7	Pirikool Mud R2	3	2	0	0	0	1	0	0	0	2	0	0	0	0	2	0	0	0	3	0	3	0	3	1	0	3	1	100	100	33.3333
14	8	7	Pirikool Mud R2	3	3	0	0	0	9	0	0	0	4	0	0	0	0	9	0	0	0	13	0	13	0	13	9	0	13	1	100	100	69.2308
15	8	7	Pirikool Mud R2	3	4	0	0	0	2	0	0	1	7	0	0	0	0	9	0	1	0	9	1	9	0	10	2	0	10	1	90	100	20
16	8	7	Pirikool Mud R2	3	5	0	0	1	1	0	0	0	3	0	0	0	0	3	0	1	0	4	1	4	0	5	2	0	5	1	80	100	40
17	8	7	Pirikool Mud R2	3	6	0	3	1	20	0	0	0	9	0	0	0	0	25	0	1	3	29	1	32	3	30	24	0	33	1	96.9697	90.9091	72.7273
18	8	7	Pirikool Mud R2	3	7	0	0	0	3	0	0	0	3	0	0	0	0	6	0	0	0	6	0	6	0	6	3	0	6	1	100	100	50
19	8	7	Pirikool Mud R2	3	8	0	0	0	4	0	0	0	8	0	0	0	0	11	0	0	0	12	0	12	0	12	4	0	12	1	100	100	33.3333
20	8	7	Pirikool Mud R2	3	9	0	0	0	3	0	0	0	1	0	0	0	0	4	0	0	0	4	0	4	0	4	3	0	4	1	100	100	75
21	8	7	Pirikool Mud R2	3	1	0	0	0	8	0	0	0	2	0	0	0	0	10	0	0	0	10	0	10	0	10	8	0	10	1	100	100	80
22	8	7	Pirikool Mud R2	3	2	0	0	0	5	0	0	0	3	0	0	0	0	7	0	0	0	8	0	8	0	8	5	0	8	1	100	100	62.5
23	8	7	Pirikool Mud R2	3	3	0	1	0	11	0	0	1	7	0	0	0	0	15	0	1	1	18	1	19	1	19	12	0	20	1	95	95	60
24	8	7	Pirikool Mud R2	3	4	0	1	0	7	0	0	0	9	0	0	0	0	16	0	0	1	16	0	17	1	16	8	0	17	1	100	94.1176	47.0588
25	8	7	Pirikool Mud R2	3	5	0	0	0	11	0	0	0	2	0	0	0	0	12	0	0	0	13	0	13	0	13	11	0	13	1	100	100	84.6154
26	8	7	Pirikool Mud R2	3	6	0	0	0	15	0	0	1	11	0	0	0	0	24	0	1	0	26	1	26	0	27	15	0	27	1	96.2963	100	55.5556
27	8	7	Pirikool Mud R2	3	7	0	1	2	12	0	0	0	12	0	0	0	0	22	0	2	1	24	2	25	1	26	15	0	27	1	92.5926	96.2963	55.5556
28	8	7	Pirikool Mud R2	3	8	0	0	0	5	0	0	0	5	0	0	0	0	9	0	0	0	10	0	10	0	10	5	0	10	1	100	100	50
29	8	7	Pirikool Mud R2	3	9	0	0	0	8	0	0	1	1	0	0	0	0	7	0	1	0	9	1	9	0	10	8	0	10	1	90	100	80
30	8	7	Pirikool Mud R2	3	1	0	1	0	3	0	0	0	7	0	0	0	0	10	0	0	1	10	0	11	1	10	4	0	11	1	100	90.9091	36.3636
31	8	7	Pirikool Mud R2	3	2	0	0	0	2	0	0	0	1	0	0	0	0	3	0	0	0	3	0	3	0	3	2	0	3	1	100	100	66.6667
32	8	7	Pirikool Mud R2	3	3	0	0	0	11	0	0	0	12	0	0	0	0	23	0	0	0	23	0	23	0	23	11	0	23	1	100	100	47.8261
33	8	7	Pirikool Mud R2	3	4	0	0	0	8	0	0	0	3	0	0	0	0	10	0	0	0	11	0	11	0	11	8	0	11	1	100	100	72.7273
34	8	7	Pirikool Mud R2	3	5	0	0	0	5	0	0	0	5	0	0	0	0	9	0	0	0	10	0	10	0	10	5	0	10	1	100	100	50
35	8	7	Pirikool Mud R2	3	6	0	3	0	8	0	0	0	5	0	0	0	0	13	0	0	3	13	0	16	3	13	11	0	16	1	100	81.25	68.75
36	8	7	Pirikool Mud R2	3	7	0	1	0	8	0	0	0	8	0	0	0	0	16	0	0	1	16	0	17	1	16	9	0	17	1	100	94.1176	52.9412
37	8	7	Pirikool Mud R2	3	8	0	0	0	7	0	0	0	11	0	0	0	0	17	0	0	0	18	0	18	0	18	7	0	18	1	100	100	38.8889
38	8	7	Pirikool Mud R2	3	9	0	0	0	7	0	0	0	0	0	0	0	0	7	0	0	0	7	0	7	0	7	7	0	7	1	100	100	100
39	8	7	Pirikool Mud R2	3	1	0	0	0	2	0	0	0	5	0	0	0	0	7	0	0	0	7	0	7	0	7	2	0	7	1	100	100	28.5714
40	8	7	Pirikool Mud R2	3	2	0	0	0	4	0	0	0	1	0	0	0	0	3	0	0	0	5	0	5	0	5	4	0	5	1	100	100	80
41	8	7	Pirikool Mud R2	3	3	0	0	0	7	0	0	0	12	0	0	0	0	18	0	0	0	19	0	19	0	19	7	0	19	1	100	100	36.8421
42	8	7	Pirikool Mud R2	3	4	0	1	0	12	0	0	0	10	0	0	0	0	22	0	0	1	22	0	23	1	22	13	0	23	1	100	95.6522	56.5217
43	8	7	Pirikool Mud R2	3	5	0	0	0	26	0	0	0	8	0	0	0	0	34	0	0	0	34	0	34	0	34	26	0	34	1	100	100	76.4706
44	8	7	Pirikool Mud R2	3	6	0	0	0	20	0	0	0	38	0	0	0	0	58	0	0	0	58	0	58	0	58	20	0	58	1	100	100	34.4828
45	8	7	Pirikool Mud R2	3	7	0	3	0	15	0	0	0	16	0	0	0	0	31	0	0	3	31	0	34	3	31	18	0	34	1	100	91.1765	52.9412
46	8	7	Pirikool Mud R2	3	8	0	1	2	11	0	0	0	11	0	0	0	0	23	0	2	1	22	2	23	1	24	14	0	25	1	92	96	56
47	8	7	Pirikool Mud R2	3	9	0	1	0	10	0	0	0	9	0	0	0	0	19	0	0	1	19	0	20	1	19	11	0	20	1	100	95	55
48	8	7	Pirikool Mud R2	3	1	0	1	1	36	0	0	0	14	0	0	0	0	48	0	1	1	50	1	51	1	51	38	0	52	1	98.0769	98.0769	73.0769
49	8	7	Pirikool Mud R2	3	2	0	1	0	18	0	0	0	4	0	0	0	0	22	0	0	1	22	0	23	1	22	19	0	23	1	100	95.6522	82.6087
50	8	7	Pirikool Mud R2	3	3	0	0	1	19	0	0	0	30	0	0	0	0	50	0	1	0	49	1	49	0	50	20	0	50	1	98	100	40
51	8	7	Pirikool Mud R2	3	4	0	1	0	16	0	0	0	14	0	0	0	0	28	0	0	1	30	0	31	1	30	17	0	31	1	100	96.7742	54.8387
52	8	7	Pirikool Mud R2	3	5	0	1	0	8	0	0	0	12	0	0	0	0	20	0	0	1	20	0	21	1	20	9	0	21	1	100	95.2381	42.8571
53	8	7	Pirikool Mud R2	3	6	0	0	26	30	0	0	0	32	0	0	0	0	88	0	26	0	62	26	62	0	88	56	0	88	1	70.4545	100	63.6364
54	8	7	Pirikool Mud R2	3	7	0	1	0	17	0	0	3	5	0	0	0	0	25	0	3	1	22	3	23	1	25	18	0	26	1	88.4615	96.1538	69.2308
67	8	7	Pirikool Mud R2	3	8	0	0	0	9	0	0	0	20	0	0	0	0	29	0	0	0	29	0	29	0	29	9	0	29	1	100	100	31.0345
68	8	7	Pirikool Mud R2	3	9	0	0	2	14	0	0	2	18	0	0	0	0	36	0	4	0	32	4	32	0	36	16	0	36	1	88.8889	100	44.4444
69	8	7	Pirikool Mud R2	3	1	0	0	0	10	0	0	0	3	0	0	0	0	13	0	0	0	13	0	13	0	13	10	0	13	1	100	100	76.9231
70	8	7	Pirikool Mud R2	3	2	0	0	0	9	0	0	0	11	0	0	0	0	20	0	0	0	20	0	20	0	20	9	0	20	1	100	100	45
71	8	7	Pirikool Mud R2	3	3	0	0	0	12	0	0	0	22	0	0	0	0	33	0	0	0	34	0	34	0	34	12	0	34	1	100	100	35.2941
72	8	7	Pirikool Mud R2	3	4	0	0	3	31	0	0	0	35	0	0	0	0	69	0	3	0	66	3	66	0	69	34	0	69	1	95.6522	100	49.2754
73	8	7	Pirikool Mud R2	3	5	0	0	1	35	0	0	1	27	0	0	0	0	63	0	2	0	62	2	62	0	64	36	0	64	1	96.875	100	56.25
74	8	7	Pirikool Mud R2	3	6	0	0	2	18	0	0	1	16	0	0	0	0	37	0	3	0	34	3	34	0	37	20	0	37	1	91.8919	100	54.0541
75	8	7	Pirikool Mud R2	3	7	0	1	0	5	0	0	1	13	0	0	0	0	19	0	1	1	18	1	19	1	19	6	0	20	1	95	95	30
76	8	7	Pirikool Mud R2	3	8	0	0	1	18	0	0	0	4	0	0	0	0	23	0	1	0	22	1	22	0	23	19	0	23	1	95.6522	100	82.6087
77	8	7	Pirikool Mud R2	3	9	0	0	0	23	0	0	1	21	0	0	0	0	45	0	1	0	44	1	44	0	45	23	0	45	1	97.7778	100	51.1111
78	8	7	Pirikool Mud R2	3	1	0	0	1	12	0	0	0	16	0	0	0	0	29	0	1	0	28	1	28	0	29	13	0	29	1	96.5517	100	44.8276
79	8	7	Pirikool Mud R2	3	2	0	0	0	5	0	0	0	7	0	0	0	0	10	0	0	0	12	0	12	0	12	5	0	12	1	100	100	41.6667
80	8	7	Pirikool Mud R2	3	3	0	0	0	3	0	0	0	2	0	0	0	0	5	0	0	0	5	0	5	0	5	3	0	5	1	100	100	60
81	8	7	Pirikool Mud R2	3	4	0	-2	1	6	0	0	0	10	0	0	0	0	15	0	1	-2	16	1	14	-2	17	5	0	15	1	93.3333	113.333	33.3333
82	8	7	Pirikool Mud R2	3	5	0	2	0	5	0	0	0	3	0	0	0	0	8	0	0	2	8	0	10	2	8	7	0	10	1	100	80	70
83	8	7	Pirikool Mud R2	3	6	0	0	0	1	0	0	1	1	0	0	0	0	3	0	1	0	2	1	2	0	3	1	0	3	1	66.6667	100	33.3333
84	8	7	Pirikool Mud R2	3	7	0	0	0	2	0	0	1	1	0	0	0	0	4	0	1	0	3	1	3	0	4	2	0	4	1	75	100	50
85	8	7	Pirikool Mud R2	3	8	0	0	0	5	0	0	0	1	0	0	0	0	6	0	0	0	6	0	6	0	6	5	0	6	1	100	100	83.3333
86	8	7	Pirikool Mud R2	3	9	0	0	0	1	0	0	0	2	0	0	0	0	3	0	0	0	3	0	3	0	3	1	0	3	1	100	100	33.3333
87	8	7	Pirikool Mud R2	3	1	0	0	0	3	0	0	0	1	0	0	0	0	4	0	0	0	4	0	4	0	4	3	0	4	1	100	100	75
88	8	7	Pirikool Mud R2	3	2	0	0	1	13	0	0	2	15	0	0	0	0	31	0	3	0	28	3	28	0	31	14	0	31	1	90.3226	100	45.1613
89	8	7	Pirikool Mud R2	3	3	0	0	0	11	0	0	0	18	0	0	0	0	29	0	0	0	29	0	29	0	29	11	0	29	1	100	100	37.931
90	8	7	Pirikool Mud R2	3	4	0	0	1	5	0	0	0	9	0	0	0	0	15	0	1	0	14	1	14	0	15	6	0	15	1	93.3333	100	40
91	8	7	Pirikool Mud R2	3	5	0	0	0	4	0	0	0	5	0	0	0	0	9	0	0	0	9	0	9	0	9	4	0	9	1	100	100	44.4444
92	8	7	Pirikool Mud R2	3	6	0	0	1	15	0	0	0	16	0	0	0	0	31	0	1	0	31	1	31	0	32	16	0	32	1	96.875	100	50
93	8	7	Pirikool Mud R2	3	7	0	0	1	10	0	0	0	13	0	0	0	0	24	0	1	0	23	1	23	0	24	11	0	24	1	95.8333	100	45.8333
94	8	7	Pirikool Mud R2	3	8	0	0	0	4	0	0	0	4	0	0	0	0	8	0	0	0	8	0	8	0	8	4	0	8	1	100	100	50
95	8	7	Pirikool Mud R2	3	9	0	0	0	7	0	0	0	15	0	0	0	0	22	0	0	0	22	0	22	0	22	7	0	22	1	100	100	31.8182
96	8	7	Pirikool Mud R2	3	1	0	0	0	16	0	0	0	24	0	0	0	0	40	0	0	0	40	0	40	0	40	16	0	40	1	100	100	40
97	8	7	Pirikool Mud R2	3	2	0	0	0	18	0	0	0	21	0	0	0	0	39	0	0	0	39	0	39	0	39	18	0	39	1	100	100	46.1538
98	8	7	Pirikool Mud R2	3	3	0	0	0	6	0	0	0	13	0	0	0	0	19	0	0	0	19	0	19	0	19	6	0	19	1	100	100	31.5789
99	8	7	Pirikool Mud R2	3	4	0	0	0	3	0	0	0	12	0	0	0	0	15	0	0	0	15	0	15	0	15	3	0	15	1	100	100	20
100	8	7	Pirikool Mud R2	3	5	0	0	0	5	0	0	0	6	0	0	0	0	11	0	0	0	11	0	11	0	11	5	0	11	1	100	100	45.4545
101	8	7	Pirikool Mud R2	3	6	0	0	0	2	0	0	0	5	0	0	0	0	7	0	0	0	7	0	7	0	7	2	0	7	1	100	100	28.5714
102	8	7	Pirikool Mud R2	3	7	0	0	0	5	0	0	0	4	0	0	0	0	9	0	0	0	9	0	9	0	9	5	0	9	1	100	100	55.5556
103	8	7	Pirikool Mud R2	3	8	0	0	0	13	0	0	0	4	0	0	0	0	17	0	0	0	17	0	17	0	17	13	0	17	1	100	100	76.4706
104	8	7	Pirikool Mud R2	3	9	0	0	0	7	0	0	0	14	0	0	0	0	21	0	0	0	21	0	21	0	21	7	0	21	1	100	100	33.3333
105	8	7	Pirikool Mud R2	3	1	0	0	0	12	0	0	0	16	0	0	0	0	28	0	0	0	28	0	28	0	28	12	0	28	1	100	100	42.8571
106	8	7	Pirikool Mud R2	3	2	0	0	0	28	0	0	0	23	0	0	0	0	51	0	0	0	51	0	51	0	51	28	0	51	1	100	100	54.902
107	8	7	Pirikool Mud R2	3	3	0	0	0	5	0	0	0	12	0	0	0	0	17	0	0	0	17	0	17	0	17	5	0	17	1	100	100	29.4118
108	8	7	Pirikool Mud R2	3	4	0	0	0	17	0	0	0	16	0	0	0	0	33	0	0	0	33	0	33	0	33	17	0	33	1	100	100	51.5152
109	8	7	Pirikool Mud R2	3	5	0	0	0	11	0	0	0	3	0	0	0	0	14	0	0	0	14	0	14	0	14	11	0	14	1	100	100	78.5714
110	8	7	Pirikool Mud R2	3	6	0	0	0	8	0	0	0	6	0	0	0	0	14	0	0	0	14	0	14	0	14	8	0	14	1	100	100	57.1429
111	8	7	Pirikool Mud R2	3	7	0	0	0	8	0	0	0	6	0	0	0	0	14	0	0	0	14	0	14	0	14	8	0	14	1	100	100	57.1429
112	8	7	Pirikool Mud R2	3	8	0	0	0	8	0	0	0	5	0	0	0	0	13	0	0	0	13	0	13	0	13	8	0	13	1	100	100	61.5385
113	8	7	Pirikool Mud R2	3	9	0	0	0	4	0	0	0	7	0	0	0	0	11	0	0	0	11	0	11	0	11	4	0	11	1	100	100	36.3636
114	8	7	Pirikool Mud R2	3	1	0	0	0	3	0	0	0	1	0	0	0	0	4	0	0	0	4	0	4	0	4	3	0	4	1	100	100	75
115	8	7	Pirikool Mud R2	3	2	0	0	0	4	0	0	0	7	0	0	0	0	11	0	0	0	11	0	11	0	11	4	0	11	1	100	100	36.3636
116	8	7	Pirikool Mud R2	3	3	0	0	0	2	0	0	0	3	0	0	0	0	5	0	0	0	5	0	5	0	5	2	0	5	1	100	100	40
117	8	7	Pirikool Mud R2	3	4	0	0	0	4	0	0	0	6	0	0	0	0	10	0	0	0	10	0	10	0	10	4	0	10	1	100	100	40
118	8	7	Pirikool Mud R2	3	5	0	0	0	4	0	0	0	0	0	0	0	0	4	0	0	0	4	0	4	0	4	4	0	4	1	100	100	100
119	8	7	Pirikool Mud R2	3	6	0	0	1	10	0	0	0	10	0	0	0	0	18	0	1	0	20	1	20	0	21	11	0	21	1	95.2381	100	52.381
120	8	7	Pirikool Mud R2	3	7	0	0	0	6	0	0	0	7	0	0	0	0	13	0	0	0	13	0	13	0	13	6	0	13	1	100	100	46.1538
121	8	7	Pirikool Mud R2	3	8	0	0	0	4	0	0	0	0	0	0	0	0	4	0	0	0	4	0	4	0	4	4	0	4	1	100	100	100
122	8	7	Pirikool Mud R2	3	9	0	0	0	5	0	0	0	4	0	0	0	0	9	0	0	0	9	0	9	0	9	5	0	9	1	100	100	55.5556
123	8	7	Pirikool Mud R2	3	1	0	0	0	14	0	0	0	1	0	0	0	0	15	0	0	0	15	0	15	0	15	14	0	15	1	100	100	93.3333
124	8	7	Pirikool Mud R2	3	2	0	0	0	3	0	0	0	0	0	0	0	0	3	0	0	0	3	0	3	0	3	3	0	3	1	100	100	100
125	8	7	Pirikool Mud R2	3	3	0	1	0	1	0	0	0	7	0	0	0	0	7	0	0	1	8	0	9	1	8	2	0	9	1	100	88.8889	22.2222
126	8	7	Pirikool Mud R2	3	4	0	0	0	4	0	0	0	5	0	0	0	0	7	0	0	0	9	0	9	0	9	4	0	9	1	100	100	44.4444
127	8	7	Pirikool Mud R2	3	5	0	0	0	7	0	0	0	2	0	0	0	0	6	0	0	0	9	0	9	0	9	7	0	9	1	100	100	77.7778
128	8	7	Pirikool Mud R2	3	6	0	0	0	6	0	0	0	1	0	0	0	0	5	0	0	0	7	0	7	0	7	6	0	7	1	100	100	85.7143
129	8	7	Pirikool Mud R2	3	7	0	0	0	8	0	0	0	6	0	0	0	0	11	0	0	0	14	0	14	0	14	8	0	14	1	100	100	57.1429
130	8	7	Pirikool Mud R2	3	8	0	0	0	5	0	0	0	5	0	0	0	0	10	0	0	0	10	0	10	0	10	5	0	10	1	100	100	50
131	8	7	Pirikool Mud R2	3	9	0	0	0	9	0	0	0	7	0	0	0	0	13	0	0	0	16	0	16	0	16	9	0	16	1	100	100	56.25
132	8	7	Pirikool Mud R2	3	1	0	4	0	18	0	0	0	9	0	0	0	0	27	0	0	4	27	0	31	4	27	22	0	31	1	100	87.0968	70.9677
133	8	7	Pirikool Mud R2	3	2	0	0	0	8	0	0	0	0	0	0	0	0	4	0	0	0	8	0	8	0	8	8	0	8	1	100	100	100
134	8	7	Pirikool Mud R2	3	3	0	1	0	7	0	0	0	12	0	0	0	0	19	0	0	1	19	0	20	1	19	8	0	20	1	100	95	40
135	8	7	Pirikool Mud R2	3	4	1	-1	0	8	0	0	0	11	0	0	0	0	18	1	0	-1	19	1	18	0	19	8	0	19	1	94.7368	100	42.1053
136	8	7	Pirikool Mud R2	3	5	0	0	0	6	0	0	0	6	0	0	0	0	10	0	0	0	12	0	12	0	12	6	0	12	1	100	100	50
137	8	7	Pirikool Mud R2	3	6	0	0	0	6	0	0	0	14	0	0	0	0	17	0	0	0	20	0	20	0	20	6	0	20	1	100	100	30
138	8	7	Pirikool Mud R2	3	7	0	0	0	7	0	0	0	6	0	0	0	0	9	0	0	0	13	0	13	0	13	7	0	13	1	100	100	53.8462
139	8	7	Pirikool Mud R2	3	8	0	1	0	11	0	0	0	3	0	0	0	0	13	0	0	1	14	0	15	1	14	12	0	15	1	100	93.3333	80
140	8	7	Pirikool Mud R2	3	9	0	1	0	3	0	0	0	12	0	0	0	0	14	0	0	1	15	0	16	1	15	4	0	16	1	100	93.75	25
141	8	7	Pirikool Mud R2	3	1	0	6	0	11	0	0	0	18	0	0	0	0	24	0	0	6	29	0	35	6	29	17	0	35	1	100	82.8571	48.5714
142	8	7	Pirikool Mud R2	3	2	0	2	0	6	0	0	0	23	0	0	0	0	28	0	0	2	29	0	31	2	29	8	0	31	1	100	93.5484	25.8065
143	8	7	Pirikool Mud R2	3	3	0	0	0	3	0	0	0	1	0	0	0	0	4	0	0	0	4	0	4	0	4	3	0	4	1	100	100	75
144	8	7	Pirikool Mud R2	3	4	0	1	0	7	0	0	0	2	0	0	0	0	8	0	0	1	9	0	10	1	9	8	0	10	1	100	90	80
145	8	7	Pirikool Mud R2	3	5	0	0	3	3	0	0	0	2	0	0	0	0	5	0	3	0	5	3	5	0	8	6	0	8	1	62.5	100	75
146	8	7	Pirikool Mud R2	3	6	0	0	0	7	0	0	0	0	0	0	0	0	7	0	0	0	7	0	7	0	7	7	0	7	1	100	100	100
147	8	7	Pirikool Mud R2	3	7	0	4	0	6	0	0	0	6	0	0	0	0	12	0	0	4	12	0	16	4	12	10	0	16	1	100	75	62.5
148	8	7	Pirikool Mud R2	3	8	0	3	0	1	0	0	0	1	0	0	0	0	2	0	0	3	2	0	5	3	2	4	0	5	1	100	40	80
149	8	7	Pirikool Mud R2	3	9	0	5	0	4	0	0	0	9	0	0	0	0	13	0	0	5	13	0	18	5	13	9	0	18	1	100	72.2222	50
150	8	7	Pirikool Mud R2	3	1	0	8	0	9	0	0	0	1	0	0	0	0	10	0	0	8	10	0	18	8	10	17	0	18	1	100	55.5556	94.4444
151	8	7	Pirikool Mud R2	3	2	0	4	0	2	0	0	0	0	0	0	0	0	2	0	0	4	2	0	6	4	2	6	0	6	1	100	33.3333	100
152	8	7	Pirikool Mud R2	3	3	0	0	0	9	0	0	0	0	0	0	0	0	5	0	0	0	9	0	9	0	9	9	0	9	1	100	100	100
153	8	7	Pirikool Mud R2	3	4	0	2	0	8	0	0	0	6	0	0	0	0	14	0	0	2	14	0	16	2	14	10	0	16	1	100	87.5	62.5
154	8	7	Pirikool Mud R2	3	5	0	2	0	5	0	0	0	2	0	0	0	0	7	0	0	2	7	0	9	2	7	7	0	9	1	100	77.7778	77.7778
155	8	7	Pirikool Mud R2	3	6	0	5	0	4	0	0	0	2	0	0	0	0	5	0	0	5	6	0	11	5	6	9	0	11	1	100	54.5455	81.8182
156	8	7	Pirikool Mud R2	3	7	0	3	0	5	0	0	0	7	0	0	0	0	11	0	0	3	12	0	15	3	12	8	0	15	1	100	80	53.3333
157	8	7	Pirikool Mud R2	3	8	0	4	0	8	0	0	0	4	0	0	0	0	12	0	0	4	12	0	16	4	12	12	0	16	1	100	75	75
158	8	7	Pirikool Mud R2	3	9	0	2	0	5	0	0	0	10	0	0	0	0	15	0	0	2	15	0	17	2	15	7	0	17	1	100	88.2353	41.1765
159	8	7	Pirikool Mud R2	3	1	0	8	0	5	0	0	0	9	0	0	0	0	14	0	0	8	14	0	22	8	14	13	0	22	1	100	63.6364	59.0909
160	8	7	Pirikool Mud R2	3	2	0	10	0	10	0	0	0	7	0	0	0	0	15	0	0	10	17	0	27	10	17	20	0	27	1	100	62.963	74.0741
161	8	7	Pirikool Mud R2	3	3	0	7	0	4	0	0	0	6	0	0	0	0	9	0	0	7	10	0	17	7	10	11	0	17	1	100	58.8235	64.7059
162	8	7	Pirikool Mud R2	3	4	0	15	0	10	0	0	0	0	0	0	0	0	10	0	0	15	10	0	25	15	10	25	0	25	1	100	40	100
163	8	7	Pirikool Mud R2	3	5	0	4	0	3	0	0	0	0	0	0	0	0	3	0	0	4	3	0	7	4	3	7	0	7	1	100	42.8571	100
164	8	7	Pirikool Mud R2	3	6	0	27	0	12	0	0	0	5	0	0	0	0	13	0	0	27	17	0	44	27	17	39	0	44	1	100	38.6364	88.6364
165	8	7	Pirikool Mud R2	3	7	0	5	0	4	0	0	0	10	0	0	0	0	14	0	0	5	14	0	19	5	14	9	0	19	1	100	73.6842	47.3684
166	8	7	Pirikool Mud R2	3	8	0	8	0	9	0	0	0	3	0	0	0	0	11	0	0	8	12	0	20	8	12	17	0	20	1	100	60	85
167	8	7	Pirikool Mud R2	3	9	0	2	0	15	0	0	0	16	0	0	0	0	29	0	0	2	31	0	33	2	31	17	0	33	1	100	93.9394	51.5152
168	8	7	Pirikool Mud R2	3	1	0	8	0	8	0	0	0	8	0	0	0	0	15	0	0	8	16	0	24	8	16	16	0	24	1	100	66.6667	66.6667
169	8	7	Pirikool Mud R2	3	2	0	11	0	2	0	0	0	8	0	0	0	0	10	0	0	11	10	0	21	11	10	13	0	21	1	100	47.619	61.9048
170	8	7	Pirikool Mud R2	3	3	0	10	0	9	0	0	0	8	0	0	0	0	16	0	0	10	17	0	27	10	17	19	0	27	1	100	62.963	70.3704
171	8	7	Pirikool Mud R2	3	4	0	4	0	16	0	0	0	8	0	0	0	0	21	0	0	4	24	0	28	4	24	20	0	28	1	100	85.7143	71.4286
172	8	7	Pirikool Mud R2	3	5	0	5	0	8	0	0	0	0	0	0	0	0	8	0	0	5	8	0	13	5	8	13	0	13	1	100	61.5385	100
173	8	7	Pirikool Mud R2	3	6	0	10	0	11	0	0	0	10	0	0	0	0	17	0	0	10	21	0	31	10	21	21	0	31	1	100	67.7419	67.7419
174	8	7	Pirikool Mud R2	3	7	0	23	0	22	0	0	0	7	0	0	0	0	25	0	0	23	29	0	52	23	29	45	0	52	1	100	55.7692	86.5385
175	8	7	Pirikool Mud R2	3	8	0	0	0	6	0	0	0	8	0	0	0	0	14	0	0	0	14	0	14	0	14	6	0	14	1	100	100	42.8571
176	8	7	Pirikool Mud R2	3	9	0	3	0	10	0	0	0	12	0	0	0	0	21	0	0	3	22	0	25	3	22	13	0	25	1	100	88	52
177	8	7	Pirikool Mud R2	3	1	0	11	0	26	0	0	0	17	0	0	0	0	42	0	0	11	43	0	54	11	43	37	0	54	1	100	79.6296	68.5185
178	8	7	Pirikool Mud R2	3	2	0	9	0	19	0	0	0	11	0	0	0	0	30	0	0	9	30	0	39	9	30	28	0	39	1	100	76.9231	71.7949
179	8	7	Pirikool Mud R2	3	3	0	5	0	3	0	0	0	8	0	0	0	0	11	0	0	5	11	0	16	5	11	8	0	16	1	100	68.75	50
180	8	7	Pirikool Mud R2	3	4	0	7	0	5	0	0	0	4	0	0	0	0	9	0	0	7	9	0	16	7	9	12	0	16	1	100	56.25	75
181	8	7	Pirikool Mud R2	3	5	0	5	0	3	0	0	0	0	0	0	0	0	3	0	0	5	3	0	8	5	3	8	0	8	1	100	37.5	100
182	8	7	Pirikool Mud R2	3	6	0	3	0	8	0	0	0	13	0	0	0	0	21	0	0	3	21	0	24	3	21	11	0	24	1	100	87.5	45.8333
183	8	7	Pirikool Mud R2	3	7	0	5	0	4	0	0	0	13	0	0	0	0	17	0	0	5	17	0	22	5	17	9	0	22	1	100	77.2727	40.9091
184	8	7	Pirikool Mud R2	3	8	0	1	0	4	0	0	0	2	0	0	0	0	6	0	0	1	6	0	7	1	6	5	0	7	1	100	85.7143	71.4286
185	8	7	Pirikool Mud R2	3	9	0	4	0	5	0	0	0	0	0	0	0	0	5	0	0	4	5	0	9	4	5	9	0	9	1	100	55.5556	100
186	8	7	Pirikool Mud R2	3	1	0	6	0	6	0	0	0	6	0	0	0	0	10	0	0	6	12	0	18	6	12	12	0	18	1	100	66.6667	66.6667
187	8	7	Pirikool Mud R2	3	2	0	0	0	3	0	0	0	4	0	0	0	0	7	0	0	0	7	0	7	0	7	3	0	7	1	100	100	42.8571
188	8	7	Pirikool Mud R2	3	3	2	6	0	3	0	0	0	6	0	0	0	0	9	2	0	6	9	2	15	8	9	11	0	17	1	88.2353	52.9412	64.7059
189	8	7	Pirikool Mud R2	3	4	0	19	0	0	0	0	0	16	0	0	0	0	16	0	0	19	16	0	35	19	16	19	0	35	1	100	45.7143	54.2857
190	8	7	Pirikool Mud R2	3	5	0	3	0	4	0	0	0	0	0	0	0	0	4	0	0	3	4	0	7	3	4	7	0	7	1	100	57.1429	100
191	8	7	Pirikool Mud R2	3	6	0	5	0	9	0	0	0	11	0	0	0	0	16	0	0	5	20	0	25	5	20	14	0	25	1	100	80	56
192	8	7	Pirikool Mud R2	3	7	0	2	0	6	0	0	0	10	0	0	0	0	16	0	0	2	16	0	18	2	16	8	0	18	1	100	88.8889	44.4444
194	8	7	Pirikool Mud R2	3	9	0	4	0	2	0	0	0	8	0	0	0	0	10	0	0	4	10	0	14	4	10	6	0	14	1	100	71.4286	42.8571
195	8	7	Pirikool Mud R2	3	1	0	1	0	1	0	0	0	1	0	0	0	0	2	0	0	1	2	0	3	1	2	2	0	3	1	100	66.6667	66.6667
196	8	7	Pirikool Mud R2	3	2	0	2	0	2	0	0	0	3	0	0	0	0	5	0	0	2	5	0	7	2	5	4	0	7	1	100	71.4286	57.1429
197	8	7	Pirikool Mud R2	3	3	0	5	0	4	0	0	0	6	0	0	0	0	8	0	0	5	10	0	15	5	10	9	0	15	1	100	66.6667	60
198	8	7	Pirikool Mud R2	3	4	2	6	3	1	0	0	0	0	0	0	0	0	3	2	3	6	1	5	7	8	4	12	0	12	1	58.3333	33.3333	100
199	8	7	Pirikool Mud R2	3	5	0	1	0	2	0	0	0	0	0	0	0	0	2	0	0	1	2	0	3	1	2	3	0	3	1	100	66.6667	100
200	8	7	Pirikool Mud R2	3	6	0	3	0	6	0	0	0	0	0	0	0	0	5	0	0	3	6	0	9	3	6	9	0	9	1	100	66.6667	100
201	8	7	Pirikool Mud R2	3	7	0	2	0	3	0	0	0	0	0	0	0	0	3	0	0	2	3	0	5	2	3	5	0	5	1	100	60	100
202	8	7	Pirikool Mud R2	3	8	0	1	0	4	0	0	0	1	0	0	0	0	5	0	0	1	5	0	6	1	5	5	0	6	1	100	83.3333	83.3333
203	8	7	Pirikool Mud R2	3	9	0	1	0	2	0	0	0	3	0	0	0	0	5	0	0	1	5	0	6	1	5	3	0	6	1	100	83.3333	50
204	8	7	Pirikool Mud R2	3	1	0	3	0	8	0	0	0	0	0	0	0	0	7	0	0	3	8	0	11	3	8	11	0	11	1	100	72.7273	100
205	8	7	Pirikool Mud R2	3	2	0	2	0	2	0	0	0	8	0	0	0	0	10	0	0	2	10	0	12	2	10	4	0	12	1	100	83.3333	33.3333
206	8	7	Pirikool Mud R2	3	3	0	2	0	0	0	0	0	13	0	0	0	0	13	0	0	2	13	0	15	2	13	2	0	15	1	100	86.6667	13.3333
207	8	7	Pirikool Mud R2	3	4	3	7	0	9	0	0	0	3	0	0	0	0	11	3	0	7	12	3	19	10	12	19	0	22	1	86.3636	54.5455	86.3636
208	8	7	Pirikool Mud R2	3	5	0	6	0	6	0	0	0	0	0	0	0	0	5	0	0	6	6	0	12	6	6	12	0	12	1	100	50	100
209	8	7	Pirikool Mud R2	3	6	0	2	0	2	0	0	0	3	0	0	0	0	5	0	0	2	5	0	7	2	5	4	0	7	1	100	71.4286	57.1429
210	8	7	Pirikool Mud R2	3	7	0	4	0	0	0	0	0	2	0	0	0	0	2	0	0	4	2	0	6	4	2	4	0	6	1	100	33.3333	66.6667
211	8	7	Pirikool Mud R2	3	8	0	2	0	6	0	0	0	1	0	0	0	0	7	0	0	2	7	0	9	2	7	8	0	9	1	100	77.7778	88.8889
212	8	7	Pirikool Mud R2	3	9	0	2	1	1	0	0	0	2	0	0	0	0	3	0	1	2	3	1	5	2	4	4	0	6	1	83.3333	66.6667	66.6667
213	8	7	Pirikool Mud R2	3	1	0	1	0	1	0	0	0	2	0	0	0	0	2	0	0	1	3	0	4	1	3	2	0	4	1	100	75	50
214	8	7	Pirikool Mud R2	3	2	0	6	0	6	0	0	0	0	0	0	0	0	4	0	0	6	6	0	12	6	6	12	0	12	1	100	50	100
215	8	7	Pirikool Mud R2	3	3	0	2	0	4	0	0	0	3	0	0	0	0	7	0	0	2	7	0	9	2	7	6	0	9	1	100	77.7778	66.6667
216	8	7	Pirikool Mud R2	3	4	0	0	1	2	0	0	0	1	0	0	0	0	3	0	1	0	3	1	3	0	4	3	0	4	1	75	100	75
217	8	7	Pirikool Mud R2	3	5	0	0	0	0	0	0	0	3	0	0	0	0	3	0	0	0	3	0	3	0	3	0	0	3	1	100	100	0
218	8	7	Pirikool Mud R2	3	6	1	6	0	0	0	0	0	3	0	0	0	0	3	1	0	6	3	1	9	7	3	7	0	10	1	90	30	70
219	8	7	Pirikool Mud R2	3	7	0	1	0	1	0	0	0	3	0	0	0	0	4	0	0	1	4	0	5	1	4	2	0	5	1	100	80	40
220	8	7	Pirikool Mud R2	3	8	0	0	0	0	0	0	0	1	0	0	0	0	1	0	0	0	1	0	1	0	1	0	0	1	1	100	100	0
221	8	7	Pirikool Mud R2	3	9	0	3	0	0	0	0	0	1	0	0	0	0	1	0	0	3	1	0	4	3	1	3	0	4	1	100	25	75
223	8	7	Pirikool Mud R2	3	2	0	0	0	2	0	0	0	0	0	0	0	0	2	0	0	0	2	0	2	0	2	2	0	2	1	100	100	100
224	8	7	Pirikool Mud R2	3	3	1	0	0	4	0	0	1	1	0	0	0	0	4	1	1	0	5	2	5	1	6	5	0	7	1	71.4286	85.7143	71.4286
225	8	7	Pirikool Mud R2	3	4	0	0	0	0	0	0	0	3	0	0	0	0	3	0	0	0	3	0	3	0	3	0	0	3	1	100	100	0
228	8	7	Pirikool Mud R2	3	7	0	1	0	0	0	0	0	1	0	0	0	0	1	0	0	1	1	0	2	1	1	1	0	2	1	100	50	50
230	8	7	Pirikool Mud R2	3	9	0	1	0	0	0	0	0	0	0	0	0	0	0	0	0	1	0	0	1	1	0	1	0	1	1	100	0	100
231	8	7	Pirikool Mud R2	3	1	0	1	0	0	0	0	0	0	0	0	0	0	0	0	0	1	0	0	1	1	0	1	0	1	1	100	0	100
233	8	7	Pirikool Mud R2	3	3	0	2	0	0	0	0	0	2	0	0	0	0	2	0	0	2	2	0	4	2	2	2	0	4	1	100	50	50
234	8	7	Pirikool Mud R2	3	4	1	1	0	0	0	0	0	0	0	0	0	0	0	1	0	1	0	1	1	2	0	2	0	2	1	50	0	100
236	8	7	Pirikool Mud R2	3	6	0	1	0	0	0	0	0	0	0	0	0	0	0	0	0	1	0	0	1	1	0	1	0	1	1	100	0	100
239	8	7	Pirikool Mud R2	3	9	0	0	0	0	0	0	0	1	0	0	0	0	1	0	0	0	1	0	1	0	1	0	0	1	1	100	100	0
252	8	7	Pirikool Mud R2	3	4	1	0	0	1	0	0	0	1	0	0	0	0	2	1	0	0	2	1	2	1	2	2	0	3	1	66.6667	66.6667	66.6667
253	8	7	Pirikool Mud R2	3	5	0	0	0	0	0	0	0	1	0	0	0	0	1	0	0	0	1	0	1	0	1	0	0	1	1	100	100	0
254	8	7	Pirikool Mud R2	3	6	0	0	0	0	0	0	0	1	0	0	0	0	1	0	0	0	1	0	1	0	1	0	0	1	1	100	100	0
256	8	7	Pirikool Mud R2	3	8	1	0	0	1	0	0	0	0	0	0	0	0	1	1	0	0	1	1	1	1	1	2	0	2	1	50	50	100
261	8	7	Pirikool Mud R2	3	4	0	1	0	0	0	0	0	0	0	0	0	0	0	0	0	1	0	0	1	1	0	1	0	1	1	100	0	100
262	8	7	Pirikool Mud R2	3	5	0	0	0	4	0	0	0	0	0	0	0	0	1	0	0	0	4	0	4	0	4	4	0	4	1	100	100	100
264	8	7	Pirikool Mud R2	3	7	0	1	0	0	0	0	0	0	0	0	0	0	0	0	0	1	0	0	1	1	0	1	0	1	1	100	0	100
266	8	7	Pirikool Mud R2	3	9	0	0	0	0	0	0	0	2	0	0	0	0	2	0	0	0	2	0	2	0	2	0	0	2	1	100	100	0
267	8	7	Pirikool Mud R2	3	1	0	0	0	0	0	0	0	2	0	0	0	0	2	0	0	0	2	0	2	0	2	0	0	2	1	100	100	0
270	8	7	Pirikool Mud R2	3	4	0	2	0	0	0	0	0	0	0	0	0	0	0	0	0	2	0	0	2	2	0	2	0	2	1	100	0	100
271	8	7	Pirikool Mud R2	3	5	0	3	0	0	0	0	0	1	0	0	0	0	1	0	0	3	1	0	4	3	1	3	0	4	1	100	25	75
272	8	7	Pirikool Mud R2	3	6	0	0	0	4	0	0	0	0	0	0	0	0	4	0	0	0	4	0	4	0	4	4	0	4	1	100	100	100
274	8	7	Pirikool Mud R2	3	8	1	1	0	0	0	0	0	2	0	0	0	0	2	1	0	1	2	1	3	2	2	2	0	4	1	75	50	50
275	8	7	Pirikool Mud R2	3	9	0	1	0	0	0	0	0	0	0	0	0	0	0	0	0	1	0	0	1	1	0	1	0	1	1	100	0	100
276	8	7	Pirikool Mud R2	3	1	0	2	0	1	0	0	0	0	0	0	0	0	1	0	0	2	1	0	3	2	1	3	0	3	1	100	33.3333	100
277	8	7	Pirikool Mud R2	3	2	0	2	0	0	0	0	0	0	0	0	0	0	0	0	0	2	0	0	2	2	0	2	0	2	1	100	0	100
280	8	7	Pirikool Mud R2	3	5	0	2	0	0	0	0	0	0	0	0	0	0	0	0	0	2	0	0	2	2	0	2	0	2	1	100	0	100
283	8	7	Pirikool Mud R2	3	8	0	1	0	0	0	0	0	0	0	0	0	0	0	0	0	1	0	0	1	1	0	1	0	1	1	100	0	100
284	8	7	Pirikool Mud R2	3	9	0	2	0	0	0	0	0	0	0	0	0	0	0	0	0	2	0	0	2	2	0	2	0	2	1	100	0	100
286	8	7	Pirikool Mud R2	3	2	0	3	0	0	0	0	0	0	0	0	0	0	0	0	0	3	0	0	3	3	0	3	0	3	1	100	0	100
287	8	7	Pirikool Mud R2	3	3	0	4	0	1	0	0	0	0	0	0	0	0	1	0	0	4	1	0	5	4	1	5	0	5	1	100	20	100
288	8	7	Pirikool Mud R2	3	4	0	1	0	0	0	0	0	0	0	0	0	0	0	0	0	1	0	0	1	1	0	1	0	1	1	100	0	100
3	9	8	Actellic Mud R2	4	2	0	0	0	1	0	0	0	0	0	0	0	0	1	0	0	0	1	0	1	0	1	1	0	1	1	100	100	100
4	9	8	Actellic Mud R2	4	3	0	0	1	0	0	0	0	1	0	0	0	0	2	0	1	0	1	1	1	0	2	1	0	2	1	50	100	50
6	9	8	Actellic Mud R2	4	5	0	0	0	0	0	0	2	6	0	0	0	0	8	0	2	0	6	2	6	0	8	0	0	8	1	75	100	0
8	9	8	Actellic Mud R2	4	7	0	0	0	3	0	0	0	2	0	0	0	0	5	0	0	0	5	0	5	0	5	3	0	5	1	100	100	60
9	9	8	Actellic Mud R2	4	8	0	0	0	2	0	0	0	5	0	0	0	0	6	0	0	0	7	0	7	0	7	2	0	7	1	100	100	28.5714
10	9	8	Actellic Mud R2	4	9	0	0	1	4	0	0	1	2	0	0	0	0	5	0	2	0	6	2	6	0	8	5	0	8	1	75	100	62.5
11	9	8	Actellic Mud R2	4	1	0	0	0	1	0	0	0	3	0	0	0	0	4	0	0	0	4	0	4	0	4	1	0	4	1	100	100	25
12	9	8	Actellic Mud R2	4	2	0	0	0	1	0	0	0	4	0	0	0	0	4	0	0	0	5	0	5	0	5	1	0	5	1	100	100	20
13	9	8	Actellic Mud R2	4	3	0	0	0	2	0	0	0	0	0	0	0	0	1	0	0	0	2	0	2	0	2	2	0	2	1	100	100	100
14	9	8	Actellic Mud R2	4	4	0	0	0	2	0	0	0	0	0	0	0	0	2	0	0	0	2	0	2	0	2	2	0	2	1	100	100	100
15	9	8	Actellic Mud R2	4	5	0	1	0	5	0	0	0	5	0	0	0	0	6	0	0	1	10	0	11	1	10	6	0	11	1	100	90.9091	54.5455
16	9	8	Actellic Mud R2	4	6	0	0	0	4	0	0	0	0	0	0	0	0	4	0	0	0	4	0	4	0	4	4	0	4	1	100	100	100
17	9	8	Actellic Mud R2	4	7	0	0	0	4	0	0	0	6	0	0	0	0	8	0	0	0	10	0	10	0	10	4	0	10	1	100	100	40
18	9	8	Actellic Mud R2	4	8	0	0	0	14	0	0	0	8	0	0	0	0	17	0	0	0	22	0	22	0	22	14	0	22	1	100	100	63.6364
19	9	8	Actellic Mud R2	4	9	0	0	0	2	0	0	0	4	0	0	0	0	4	0	0	0	6	0	6	0	6	2	0	6	1	100	100	33.3333
20	9	8	Actellic Mud R2	4	1	0	0	0	6	0	0	0	4	0	0	0	0	7	0	0	0	10	0	10	0	10	6	0	10	1	100	100	60
21	9	8	Actellic Mud R2	4	2	0	0	0	9	0	0	0	2	0	0	0	0	11	0	0	0	11	0	11	0	11	9	0	11	1	100	100	81.8182
22	9	8	Actellic Mud R2	4	3	0	1	1	9	0	0	0	13	0	0	0	0	21	0	1	1	22	1	23	1	23	11	0	24	1	95.8333	95.8333	45.8333
23	9	8	Actellic Mud R2	4	4	0	4	0	6	0	0	0	5	0	0	0	0	11	0	0	4	11	0	15	4	11	10	0	15	1	100	73.3333	66.6667
24	9	8	Actellic Mud R2	4	5	0	1	0	12	0	0	0	9	0	0	0	0	21	0	0	1	21	0	22	1	21	13	0	22	1	100	95.4545	59.0909
25	9	8	Actellic Mud R2	4	6	0	0	0	9	0	0	1	7	0	0	0	0	17	0	1	0	16	1	16	0	17	9	0	17	1	94.1176	100	52.9412
26	9	8	Actellic Mud R2	4	7	0	0	0	4	0	0	0	1	0	0	0	0	5	0	0	0	5	0	5	0	5	4	0	5	1	100	100	80
27	9	8	Actellic Mud R2	4	8	0	3	0	15	0	0	0	15	0	0	0	0	29	0	0	3	30	0	33	3	30	18	0	33	1	100	90.9091	54.5455
28	9	8	Actellic Mud R2	4	9	0	1	0	7	0	0	0	7	0	0	0	0	14	0	0	1	14	0	15	1	14	8	0	15	1	100	93.3333	53.3333
29	9	8	Actellic Mud R2	4	1	0	0	0	5	0	0	0	10	0	0	0	0	15	0	0	0	15	0	15	0	15	5	0	15	1	100	100	33.3333
30	9	8	Actellic Mud R2	4	2	0	0	0	2	0	0	0	2	0	0	0	0	3	0	0	0	4	0	4	0	4	2	0	4	1	100	100	50
31	9	8	Actellic Mud R2	4	3	0	1	0	0	0	0	0	7	0	0	0	0	7	0	0	1	7	0	8	1	7	1	0	8	1	100	87.5	12.5
32	9	8	Actellic Mud R2	4	4	0	1	0	4	0	0	0	2	0	0	0	0	6	0	0	1	6	0	7	1	6	5	0	7	1	100	85.7143	71.4286
33	9	8	Actellic Mud R2	4	5	0	1	0	10	0	0	0	14	0	0	0	0	22	0	0	1	24	0	25	1	24	11	0	25	1	100	96	44
34	9	8	Actellic Mud R2	4	6	0	0	0	10	0	0	0	9	0	0	0	0	19	0	0	0	19	0	19	0	19	10	0	19	1	100	100	52.6316
35	9	8	Actellic Mud R2	4	7	0	0	0	6	0	0	0	2	0	0	0	0	8	0	0	0	8	0	8	0	8	6	0	8	1	100	100	75
36	9	8	Actellic Mud R2	4	8	0	2	0	8	0	0	0	11	0	0	0	0	17	0	0	2	19	0	21	2	19	10	0	21	1	100	90.4762	47.619
37	9	8	Actellic Mud R2	4	9	0	3	0	7	0	0	0	12	0	0	0	0	18	0	0	3	19	0	22	3	19	10	0	22	1	100	86.3636	45.4545
38	9	8	Actellic Mud R2	4	1	0	1	0	5	0	0	0	10	0	0	0	0	14	0	0	1	15	0	16	1	15	6	0	16	1	100	93.75	37.5
39	9	8	Actellic Mud R2	4	2	0	0	0	2	0	0	0	2	0	0	0	0	4	0	0	0	4	0	4	0	4	2	0	4	1	100	100	50
40	9	8	Actellic Mud R2	4	3	0	0	0	9	0	0	0	16	0	0	0	0	21	0	0	0	25	0	25	0	25	9	0	25	1	100	100	36
41	9	8	Actellic Mud R2	4	4	0	0	0	6	0	0	0	0	0	0	0	0	5	0	0	0	6	0	6	0	6	6	0	6	1	100	100	100
42	9	8	Actellic Mud R2	4	5	0	1	0	26	0	0	0	16	0	0	0	0	37	0	0	1	42	0	43	1	42	27	0	43	1	100	97.6744	62.7907
43	9	8	Actellic Mud R2	4	6	0	1	0	6	0	0	0	2	0	0	0	0	8	0	0	1	8	0	9	1	8	7	0	9	1	100	88.8889	77.7778
44	9	8	Actellic Mud R2	4	7	0	2	0	14	0	0	0	13	0	0	0	0	25	0	0	2	27	0	29	2	27	16	0	29	1	100	93.1034	55.1724
45	9	8	Actellic Mud R2	4	8	0	2	8	35	0	0	0	8	0	0	0	0	38	0	8	2	43	8	45	2	51	45	0	53	1	84.9057	96.2264	84.9057
46	9	8	Actellic Mud R2	4	9	0	1	0	12	0	0	1	12	0	0	0	0	23	0	1	1	24	1	25	1	25	13	0	26	1	96.1538	96.1538	50
47	9	8	Actellic Mud R2	4	1	0	6	0	43	0	0	0	40	0	0	0	0	78	0	0	6	83	0	89	6	83	49	0	89	1	100	93.2584	55.0562
48	9	8	Actellic Mud R2	4	2	0	1	0	16	0	0	0	10	0	0	0	0	25	0	0	1	26	0	27	1	26	17	0	27	1	100	96.2963	62.963
49	9	8	Actellic Mud R2	4	3	0	12	0	19	0	0	0	20	0	0	0	0	33	0	0	12	39	0	51	12	39	31	0	51	1	100	76.4706	60.7843
50	9	8	Actellic Mud R2	4	4	1	7	0	9	0	0	1	4	0	0	0	0	14	1	1	7	13	2	20	8	14	17	0	22	1	90.9091	63.6364	77.2727
51	9	8	Actellic Mud R2	4	5	0	20	0	11	0	0	0	12	0	0	0	0	18	0	0	20	23	0	43	20	23	31	0	43	1	100	53.4884	72.093
52	9	8	Actellic Mud R2	4	6	0	6	0	8	0	0	0	10	0	0	0	0	13	0	0	6	18	0	24	6	18	14	0	24	1	100	75	58.3333
53	9	8	Actellic Mud R2	4	7	2	10	5	10	0	0	1	22	0	0	0	0	35	2	6	10	32	8	42	12	38	27	0	50	1	84	76	54
54	9	8	Actellic Mud R2	4	8	0	13	0	23	0	0	0	26	0	0	0	0	44	0	0	13	49	0	62	13	49	36	0	62	1	100	79.0323	58.0645
67	9	8	Actellic Mud R2	4	9	0	7	0	3	0	0	0	0	0	0	0	0	2	0	0	7	3	0	10	7	3	10	0	10	1	100	30	100
68	9	8	Actellic Mud R2	4	1	0	7	0	17	0	0	0	25	0	0	0	0	37	0	0	7	42	0	49	7	42	24	0	49	1	100	85.7143	48.9796
69	9	8	Actellic Mud R2	4	2	0	2	2	20	0	0	2	21	0	0	0	0	41	0	4	2	41	4	43	2	45	24	0	47	1	91.4894	95.7447	51.0638
70	9	8	Actellic Mud R2	4	3	0	0	0	6	0	0	0	15	0	0	0	0	21	0	0	0	21	0	21	0	21	6	0	21	1	100	100	28.5714
71	9	8	Actellic Mud R2	4	4	0	1	0	15	0	0	1	20	0	0	0	0	36	0	1	1	35	1	36	1	36	16	0	37	1	97.2973	97.2973	43.2432
72	9	8	Actellic Mud R2	4	5	0	0	3	40	0	0	0	15	0	0	0	0	44	0	3	0	55	3	55	0	58	43	0	58	1	94.8276	100	74.1379
73	9	8	Actellic Mud R2	4	6	1	3	0	16	0	0	2	34	0	0	0	0	51	1	2	3	50	3	53	4	52	20	0	56	1	94.6429	92.8571	35.7143
74	9	8	Actellic Mud R2	4	7	0	3	0	0	0	0	0	27	0	0	0	0	27	0	0	3	27	0	30	3	27	3	0	30	1	100	90	10
75	9	8	Actellic Mud R2	4	8	1	6	0	0	0	0	1	6	0	0	0	0	7	1	1	6	6	2	12	7	7	7	0	14	1	85.7143	50	50
76	9	8	Actellic Mud R2	4	9	0	0	0	8	0	0	1	10	0	0	0	0	15	0	1	0	18	1	18	0	19	8	0	19	1	94.7368	100	42.1053
77	9	8	Actellic Mud R2	4	1	0	11	1	10	0	0	0	16	0	0	0	0	22	0	1	11	26	1	37	11	27	22	0	38	1	97.3684	71.0526	57.8947
78	9	8	Actellic Mud R2	4	2	0	2	0	3	0	0	2	49	0	0	0	0	54	0	2	2	52	2	54	2	54	5	0	56	1	96.4286	96.4286	8.92857
79	9	8	Actellic Mud R2	4	3	0	3	0	0	0	0	0	3	0	0	0	0	3	0	0	3	3	0	6	3	3	3	0	6	1	100	50	50
80	9	8	Actellic Mud R2	4	4	0	9	0	1	0	0	0	15	0	0	0	0	15	0	0	9	16	0	25	9	16	10	0	25	1	100	64	40
81	9	8	Actellic Mud R2	4	5	0	4	1	2	0	0	0	5	0	0	0	0	6	0	1	4	7	1	11	4	8	7	0	12	1	91.6667	66.6667	58.3333
82	9	8	Actellic Mud R2	4	6	0	1	1	2	0	0	0	1	0	0	0	0	4	0	1	1	3	1	4	1	4	4	0	5	1	80	80	80
83	9	8	Actellic Mud R2	4	7	0	1	1	1	0	0	0	3	0	0	0	0	3	0	1	1	4	1	5	1	5	3	0	6	1	83.3333	83.3333	50
84	9	8	Actellic Mud R2	4	8	0	1	0	3	0	0	0	0	0	0	0	0	1	0	0	1	3	0	4	1	3	4	0	4	1	100	75	100
85	9	8	Actellic Mud R2	4	9	0	2	0	1	0	0	0	2	0	0	0	0	2	0	0	2	3	0	5	2	3	3	0	5	1	100	60	60
86	9	8	Actellic Mud R2	4	1	0	6	0	1	0	0	0	2	0	0	0	0	2	0	0	6	3	0	9	6	3	7	0	9	1	100	33.3333	77.7778
87	9	8	Actellic Mud R2	4	2	0	4	0	0	0	0	0	4	0	0	0	0	4	0	0	4	4	0	8	4	4	4	0	8	1	100	50	50
88	9	8	Actellic Mud R2	4	3	0	9	0	3	0	0	0	1	0	0	0	0	3	0	0	9	4	0	13	9	4	12	0	13	1	100	30.7692	92.3077
89	9	8	Actellic Mud R2	4	4	1	5	0	5	0	0	0	7	0	0	0	0	9	1	0	5	12	1	17	6	12	11	0	18	1	94.4444	66.6667	61.1111
90	9	8	Actellic Mud R2	4	5	0	1	0	8	0	0	0	3	0	0	0	0	5	0	0	1	11	0	12	1	11	9	0	12	1	100	91.6667	75
91	9	8	Actellic Mud R2	4	6	0	3	2	6	0	0	1	15	0	0	0	0	23	0	3	3	21	3	24	3	24	11	0	27	1	88.8889	88.8889	40.7407
92	9	8	Actellic Mud R2	4	7	0	2	0	4	0	0	0	4	0	0	0	0	6	0	0	2	8	0	10	2	8	6	0	10	1	100	80	60
93	9	8	Actellic Mud R2	4	8	0	2	1	10	0	0	0	5	0	0	0	0	12	0	1	2	15	1	17	2	16	13	0	18	1	94.4444	88.8889	72.2222
94	9	8	Actellic Mud R2	4	9	0	3	0	2	0	0	0	10	0	0	0	0	10	0	0	3	12	0	15	3	12	5	0	15	1	100	80	33.3333
95	9	8	Actellic Mud R2	4	1	1	1	1	11	0	0	0	1	0	0	0	0	7	1	1	1	12	2	13	2	13	14	0	15	1	86.6667	86.6667	93.3333
96	9	8	Actellic Mud R2	4	2	0	14	0	6	0	0	0	10	0	0	0	0	10	0	0	14	16	0	30	14	16	20	0	30	1	100	53.3333	66.6667
97	9	8	Actellic Mud R2	4	3	0	3	0	3	0	0	0	4	0	0	0	0	7	0	0	3	7	0	10	3	7	6	0	10	1	100	70	60
98	9	8	Actellic Mud R2	4	4	0	5	0	2	0	0	0	6	0	0	0	0	6	0	0	5	8	0	13	5	8	7	0	13	1	100	61.5385	53.8462
99	9	8	Actellic Mud R2	4	5	7	6	0	2	0	0	0	0	0	0	0	0	0	7	0	6	2	7	8	13	2	15	0	15	1	53.3333	13.3333	100
100	9	8	Actellic Mud R2	4	6	0	4	0	4	0	0	0	4	0	0	0	0	7	0	0	4	8	0	12	4	8	8	0	12	1	100	66.6667	66.6667
101	9	8	Actellic Mud R2	4	7	0	5	0	1	0	0	0	2	0	0	0	0	2	0	0	5	3	0	8	5	3	6	0	8	1	100	37.5	75
102	9	8	Actellic Mud R2	4	8	0	2	0	0	0	0	0	4	0	0	0	0	4	0	0	2	4	0	6	2	4	2	0	6	1	100	66.6667	33.3333
103	9	8	Actellic Mud R2	4	9	0	3	0	1	0	0	0	5	0	0	0	0	5	0	0	3	6	0	9	3	6	4	0	9	1	100	66.6667	44.4444
104	9	8	Actellic Mud R2	4	1	0	4	0	6	0	0	0	8	0	0	0	0	14	0	0	4	14	0	18	4	14	10	0	18	1	100	77.7778	55.5556
105	9	8	Actellic Mud R2	4	2	1	5	0	0	0	0	0	4	0	0	0	0	4	1	0	5	4	1	9	6	4	6	0	10	1	90	40	60
106	9	8	Actellic Mud R2	4	3	0	8	0	6	0	0	0	6	0	0	0	0	12	0	0	8	12	0	20	8	12	14	0	20	1	100	60	70
107	9	8	Actellic Mud R2	4	4	3	1	0	0	0	0	0	7	0	0	0	0	7	3	0	1	7	3	8	4	7	4	0	11	1	72.7273	63.6364	36.3636
108	9	8	Actellic Mud R2	4	5	0	5	0	5	0	0	0	0	0	0	0	0	5	0	0	5	5	0	10	5	5	10	0	10	1	100	50	100
[truncated: 140 more rows]

## Sheet: treatment codes
Code	Treatment name
0	Untreated Hut
1	Pirikool Cement R1
2	Actellic Cement R1
3	Pirikool Cement R2
4	Actellic Cement R2
5	Pirikool Mud R1
6	Actellic Mud R1
7	Pirikool Mud R2
8	Actellic Mud R2
